# Supplementary material for: Identification of Novel COVID-19 Biomarkers by Multiple Feature Selection Strategies
Source: Hindawi journal article supplement (doi:10.1155/2021/2203636), 2021-09-27
Supplement: f1 [file 2203636.f1.pdf]

## Supplementary Table S1 Acquired genes after standardization

id

A1BG

A1CF

A2M

A2ML1

A4GALT

AAAS

AACS

AADACL2

AADACP1

AADAT

AAGAB

AAK1

AAMDC

AAMP

AAR2

AARD

AARS1

AARS2

AARSD1

AASDH

AASDHPPT

AASS

AATF

AATK

ABAT

ABCA1

ABCA10

ABCA11P

ABCA12

ABCA13

ABCA2

ABCA3

ABCA4

ABCA5

ABCA6

ABCA7

ABCA8

ABCA9

ABCB1

ABCB10

ABCB11

ABCB5

ABCB6

ABCB7

ABCB8

ABCB9

ABCC1

ABCC10

ABCC11

ABCC13

ABCC2

ABCC3

ABCC4

ABCC5

ABCC6

ABCC6P1

ABCC6P2

ABCC9  
ABCD1  
ABCD2  
ABCD3  
ABCD4  
ABCE1  
ABCF1  
ABCF2  
ABCF3  
ABCG1  
ABCG8  
ABHD1  
ABHD10  
ABHD11  
ABHD11-AS1  
ABHD12  
ABHD12B  
ABHD13  
ABHD14A  
ABHD14B  
ABHD15  
ABHD16A  
ABHD16B  
ABHD17A  
ABHD17B  
ABHD17C  
ABHD18  
ABHD2  
ABHD3  
ABHD4  
ABHD5  
ABHD6  
ABHD8  
ABI1  
ABI2  
ABI3  
ABI3BP  
ABITRAM  
ABL1  
ABL2  
ABLIM1  
ABLIM3  
ABO  
ABR  
ABRACL  
ABRAXAS1  
ABRAXAS2  
ABT1  
ABTB1  
ABTB2  
AC000367.1  
AC001226.2  
AC002543.1  
AC002996.1  
AC003002.2  
AC003005.1  
AC003080.1  
AC003688.2

AC004076.1  
AC004805.1  
AC004890.2  
AC004910.1  
AC004923.1  
AC004951.2  
AC004980.1  
AC004980.6  
AC005041.1  
AC005077.4  
AC005154.2  
AC005154.5  
AC005324.3  
AC005324.4  
AC005476.1  
AC005515.1  
AC005520.3  
AC005531.1  
AC005622.1  
AC005726.1  
AC005822.1  
AC005832.4  
AC005833.1  
AC005865.1  
AC006001.3  
AC006030.1  
AC006042.2  
AC006254.1  
AC006453.3  
AC006486.1  
AC006978.1  
AC006978.2  
AC007000.3  
AC007040.2  
AC007068.1  
AC007192.1  
AC007318.1  
AC007325.1  
AC007325.2  
AC007325.4  
AC007342.3  
AC007424.1  
AC007906.2  
AC008013.2  
AC008038.1  
AC008072.1  
AC008073.3  
AC008132.1  
AC008163.1  
AC008267.2  
AC008565.1  
AC008567.1  
AC008575.1  
AC008695.1  
AC008752.4  
AC008758.1  
AC008763.2  
AC008770.2

AC008878.3  
AC008982.1  
AC008982.3  
AC009053.2  
AC009093.3  
AC009133.6  
AC009220.2  
AC009237.3  
AC009299.1  
AC009779.4  
AC009879.1  
AC009927.1  
AC010132.3  
AC010186.2  
AC010203.1  
AC010240.3  
AC010255.3  
AC010319.1  
AC010325.1  
AC010326.4  
AC010422.6  
AC010507.1  
AC010522.1  
AC010615.1  
AC010886.1  
AC010970.1  
AC011043.1  
AC011295.1  
AC011295.2  
AC011330.1  
AC011448.1  
AC011479.2  
AC011497.2  
AC011498.4  
AC011511.1  
AC011511.4  
AC011939.1  
AC012085.1  
AC012184.2  
AC012254.2  
AC012435.2  
AC012618.3  
AC012651.1  
AC013394.1  
AC013470.2  
AC015688.4  
AC015813.2  
AC015871.1  
AC015911.7  
AC016571.1  
AC016582.1  
AC016582.3  
AC017083.3  
AC017099.1  
AC018523.2  
AC018552.1  
AC018635.1  
AC018638.4

AC018638.5  
AC018644.1  
AC018755.2  
AC018797.2  
AC019117.4  
AC020779.1  
AC020915.1  
AC020915.5  
AC022080.2  
AC022149.1  
AC022182.3  
AC022384.1  
AC022400.7  
AC022415.2  
AC022973.2  
AC023050.5  
AC023055.1  
AC024293.1  
AC024560.2  
AC024568.1  
AC025423.2  
AC026150.3  
AC026348.1  
AC026412.1  
AC026464.4  
AC026464.6  
AC027796.3  
AC034102.2  
AC034236.1  
AC036176.2  
AC040162.1  
AC040978.1  
AC044860.1  
AC046176.1  
AC053481.2  
AC060766.1  
AC063952.1  
AC063976.2  
AC066616.1  
AC066616.2  
AC067968.1  
AC068279.1  
AC068491.1  
AC068533.4  
AC068547.1  
AC068580.4  
AC068620.3  
AC068631.3  
AC068647.1  
AC068896.3  
AC069368.1  
AC069503.2  
AC073065.1  
AC073107.1  
AC073135.7  
AC073896.1  
AC074141.1  
AC078819.1

AC078927.1  
AC079363.1  
AC079414.2  
AC079416.2  
AC079447.1  
AC079594.2  
AC079781.1  
AC079880.2  
AC083899.1  
AC084337.1  
AC084871.1  
AC087163.2  
AC087289.3  
AC087359.1  
AC087632.2  
AC087633.2  
AC087894.1  
AC090004.1  
AC090114.3  
AC090151.1  
AC090227.2  
AC090519.1  
AC090527.3  
AC090607.2  
AC090950.1  
AC090971.4  
AC091057.1  
AC091167.2  
AC091390.5  
AC091959.3  
AC092045.1  
AC092053.2  
AC092070.2  
AC092104.1  
AC092299.1  
AC092329.3  
AC092418.2  
AC092427.1  
AC092474.1  
AC092656.1  
AC092718.3  
AC092747.2  
AC092821.2  
AC092835.1  
AC093323.1  
AC093392.1  
AC093525.2  
AC093668.1  
AC093752.1  
AC093829.1  
AC093899.2  
AC097374.1  
AC097376.2  
AC097504.1  
AC097637.1  
AC098650.1  
AC098934.1  
AC098934.2

AC099489.1  
AC099811.2  
AC100821.1  
AC103810.1  
AC104109.3  
AC104162.1  
AC104332.1  
AC104452.1  
AC104772.1  
AC104966.1  
AC105052.3  
AC105233.2  
AC106782.1  
AC106795.1  
AC106795.4  
AC106865.1  
AC106886.6  
AC107081.3  
AC107871.1  
AC108108.1  
AC109992.1  
AC110079.1  
AC110373.1  
AC110926.1  
AC110998.1  
AC113208.4  
AC114490.1  
AC114490.2  
AC114936.1  
AC117529.1  
AC117529.2  
AC118459.2  
AC118549.1  
AC119396.1  
AC120057.2  
AC121758.2  
AC122718.1  
AC122718.2  
AC124242.2  
AC124312.1  
AC124944.2  
AC124947.2  
AC126755.1  
AC127502.1  
AC127502.3  
AC131392.1  
AC131392.2  
AC132008.2  
AC132812.1  
AC132825.1  
AC133548.2  
AC133552.1  
AC134669.1  
AC135352.1  
AC135977.1  
AC135983.3  
AC137834.1  
AC138207.8

AC138392.1  
AC138393.1  
AC138409.1  
AC138409.2  
AC138696.1  
AC138811.2  
AC138827.1  
AC138827.3  
AC138866.1  
AC138866.2  
AC138894.1  
AC138932.1  
AC138969.1  
AC139256.2  
AC139494.1  
AC139495.1  
AC139495.2  
AC139677.2  
AC139677.4  
AC139769.1  
AC139795.1  
AC141586.1  
AC145212.1  
AC146944.1  
AC183084.2  
AC211429.2  
AC211476.10  
AC211476.8  
AC211485.1  
AC211486.1  
AC211486.6  
AC233702.6  
AC233968.1  
AC235565.1  
AC240274.1  
AC241952.2  
AC242426.2  
AC243772.3  
AC243791.3  
AC243807.2  
AC243919.1  
AC243967.1  
AC244197.3  
AC244260.1  
AC244489.1  
AC244489.3  
AC244635.2  
AC244636.2  
AC244669.1  
AC245049.2  
AC245060.4  
AC245100.2  
AC245100.4  
AC245297.1  
AC245690.2  
ACAA1  
ACAA2  
ACACA



ACACB  
ACAD10  
ACAD11  
ACAD8  
ACAD9  
ACADM  
ACADS  
ACADSB  
ACADVL  
ACAN  
ACAP1  
ACAP2  
ACAP3  
ACAT1  
ACAT2  
ACBD3  
ACBD4  
ACBD5  
ACBD6  
ACBD7  
ACCS  
ACD  
ACE  
ACE2  
ACER2  
ACER3  
ACIN1  
ACKR2  
ACKR3  
ACKR4  
ACKR4P1  
ACLY  
ACO1  
ACO2  
ACOD1  
ACOT1  
ACOT11  
ACOT13  
ACOT2  
ACOT4  
ACOT7  
ACOT8  
ACOT9  
ACOX1  
ACOX2  
ACOX3  
ACOXL  
ACP1  
ACP2  
ACP3  
ACP5  
ACP6  
ACP7  
ACSBG1  
ACSF2  
ACSF3  
ACSL1  
ACSL3

ACSL4  
ACSL5  
ACSL6  
ACSM2A  
ACSM2B  
ACSM3  
ACSM6  
ACSS1  
ACSS2  
ACSS3  
ACTA2  
ACTB  
ACTG1  
ACTG1P1  
ACTG1P14  
ACTG1P17  
ACTG1P9  
ACTG2  
ACTL6A  
ACTN1  
ACTN4  
ACTR10  
ACTR1A  
ACTR1B  
ACTR2  
ACTR3  
ACTR3B  
ACTR3C  
ACTR5  
ACTR6  
ACTR8  
ACVR1  
ACVR1B  
ACVR1C  
ACVR2A  
ACVR2B  
ACVRL1  
ACY1  
ACYP1  
ACYP2  
ADA  
ADA2  
ADAD2  
ADAL  
ADAM10  
ADAM12  
ADAM15  
ADAM17  
ADAM19  
ADAM1A  
ADAM1B  
ADAM20P1  
ADAM21  
ADAM22  
ADAM28  
ADAM29  
ADAM32  
ADAM3A

ADAM8  
ADAM9  
ADAMDEC1  
ADAMTS1  
ADAMTS12  
ADAMTS14  
ADAMTS16  
ADAMTS17  
ADAMTS3  
ADAMTS4  
ADAMTS6  
ADAMTS7P1  
ADAMTS7P4  
ADAMTS9  
ADAMTSL1  
ADAMTSL3  
ADAMTSL4  
ADAMTSL5  
ADAP1  
ADAP2  
ADAR  
ADARB1  
ADARB2  
ADAT1  
ADAT2  
ADAT3  
ADCK1  
ADCK2  
ADCY1  
ADCY10  
ADCY10P1  
ADCY2  
ADCY3  
ADCY4  
ADCY5  
ADCY6  
ADCY7  
ADCY9  
ADD1  
ADD2  
ADD3  
ADGB  
ADGRA2  
ADGRA3  
ADGRB2  
ADGRD1  
ADGRD2  
ADGRE1  
ADGRE2  
ADGRE3  
ADGRE4P  
ADGRE5  
ADGRF1  
ADGRF2  
ADGRF3  
ADGRF5  
ADGRG1  
ADGRG2

ADGRG3  
ADGRG4  
ADGRG5  
ADGRG6  
ADGRL1  
ADGRL2  
ADGRL3  
ADGRV1  
ADH1A  
ADH1B  
ADH1C  
ADH4  
ADH5  
ADH6  
ADH7  
ADHFE1  
ADI1  
ADIPOQ  
ADIPOR1  
ADIPOR2  
ADIRF  
ADK  
ADM  
ADM2  
ADNP  
ADNP2  
ADO  
ADORA2A  
ADORA2B  
ADORA3  
ADPGK  
ADPRH  
ADPRHL1  
ADPRM  
ADPRS  
ADRA1A  
ADRA2A  
ADRA2B  
ADRB1  
ADRB2  
ADRB3  
ADRM1  
ADSL  
ADSS1  
ADSS2  
ADTRP  
AEBP2  
AEN  
AF107885.1  
AFAP1  
AFAP1L1  
AFAP1L2  
AFDN  
AFF1  
AFF2  
AFF3  
AFF4  
AFG1L

AFG3L1P  
AFG3L2  
AFMID  
AFTPH  
AGA  
AGAP1  
AGAP12P  
AGAP2  
AGAP3  
AGAP4  
AGAP5  
AGAP6  
AGAP7P  
AGAP9  
AGBL1  
AGBL2  
AGBL3  
AGBL4  
AGBL5  
AGER  
AGFG1  
AGFG2  
AGGF1  
AGK  
AGL  
AGMAT  
AGO1  
AGO2  
AGO3  
AGO4  
AGPAT1  
AGPAT2  
AGPAT3  
AGPAT4  
AGPAT5  
AGPS  
AGR2  
AGR3  
AGRN  
AGTPBP1  
AGTRAP  
AGXT  
AHCTF1  
AHCTF1P1  
AHCY  
AHCYL1  
AHCYL2  
AHDC1  
AHI1  
AHNAK  
AHNAK2  
AHR  
AHRR  
AHSA1  
AHSA2P  
AICDA  
AIDA  
AIDAP2

AIF1  
AIF1L  
AIFM1  
AIFM2  
AIG1  
AIM2  
AIMP1  
AIMP2  
AIP  
AIPL1  
AIRE  
AJAP1  
AJM1  
AJUBA  
AK1  
AK2  
AK3  
AK4  
AK5  
AK6  
AK7  
AK8  
AK9  
AKAP1  
AKAP10  
AKAP11  
AKAP12  
AKAP13  
AKAP14  
AKAP17A  
AKAP3  
AKAP5  
AKAP6  
AKAP7  
AKAP8  
AKAP8L  
AKAP9  
AKIP1  
AKIRIN1  
AKIRIN2  
AKNA  
AKR1A1  
AKR1B1  
AKR1B10  
AKR1B15  
AKR1C1  
AKR1C2  
AKR1C3  
AKR1D1  
AKR1E2  
AKR7A2  
AKR7L  
AKT1  
AKT1S1  
AKT2  
AKT3  
AKTIP  
AL021920.2

AL022334.1  
AL022578.1  
AL031282.1  
AL031708.1  
AL031777.2  
AL035411.1  
AL035456.1  
AL035555.2  
AL035685.1  
AL049697.1  
AL049697.3  
AL109809.1  
AL109811.3  
AL109827.1  
AL109918.1  
AL117692.1  
AL121581.1  
AL121594.1  
AL121845.3  
AL132671.2  
AL132780.3  
AL133216.2  
AL133268.1  
AL133352.1  
AL136231.1  
AL136295.1  
AL136295.4  
AL136295.5  
AL136981.1  
AL136981.2  
AL137161.1  
AL138709.1  
AL138752.2  
AL138787.1  
AL139011.2  
AL139260.3  
AL139274.1  
AL139300.1  
AL139353.1  
AL157392.5  
AL157935.3  
AL162615.1  
AL162726.3  
AL163636.2  
AL353588.1  
AL353625.1  
AL353729.2  
AL353743.1  
AL353807.3  
AL354822.1  
AL355315.1  
AL355355.1  
AL355377.1  
AL355916.3  
AL356234.1  
AL356235.1  
AL356273.4  
AL356432.3

AL356968.2  
AL357315.2  
AL359641.1  
AL359736.1  
AL359955.1  
AL359976.1  
AL365205.1  
AL390334.1  
AL390719.1  
AL390726.4  
AL390728.4  
AL390879.1  
AL391058.1  
AL391903.1  
AL391987.2  
AL445665.1  
AL449283.1  
AL450326.2  
AL450996.1  
AL512378.1  
AL512506.3  
AL512605.1  
AL513477.1  
AL513523.13  
AL513523.3  
AL513523.7  
AL589743.1  
AL589993.1  
AL590065.1  
AL590396.2  
AL591379.1  
AL591438.2  
AL591499.1  
AL591806.4  
AL591846.2  
AL604028.2  
AL627309.6  
AL645924.2  
AL662796.1  
AL669831.1  
AL669831.3  
AL669831.4  
AL671883.2  
AL671986.1  
AL672207.1  
AL691432.1  
AL731556.1  
AL731892.1  
AL732372.2  
AL732372.3  
AL773545.3  
AL807752.1  
AL928654.3  
ALAD  
ALAS1  
ALAS2  
ALCAM  
ALDH16A1



ALDH18A1  
ALDH1A1  
ALDH1A2  
ALDH1A3  
ALDH1B1  
ALDH1L1  
ALDH1L2  
ALDH2  
ALDH3A1  
ALDH3A2  
ALDH3B1  
ALDH3B2  
ALDH4A1  
ALDH5A1  
ALDH6A1  
ALDH7A1  
ALDH8A1  
ALDH9A1  
ALDOA  
ALDOC  
ALG1  
ALG10  
ALG10B  
ALG11  
ALG12  
ALG13  
ALG14  
ALG1L  
ALG2  
ALG3  
ALG5  
ALG6  
ALG8  
ALG9  
ALKBH1  
ALKBH2  
ALKBH3  
ALKBH4  
ALKBH5  
ALKBH6  
ALKBH7  
ALKBH8  
ALMS1  
ALMS1P1  
ALOX12  
ALOX12P2  
ALOX15  
ALOX15B  
ALOX15P1  
ALOX5  
ALOX5AP  
ALPK1  
ALPK2  
ALPK3  
ALPL  
ALS2  
ALS2CL  
ALYREF

AMACR  
AMBRA1  
AMD1  
AMD1P4  
AMDHD1  
AMDHD2  
AMER1  
AMER2  
AMFR  
AMIGO1  
AMIGO2  
AMIGO3  
AMMECR1  
AMMECR1L  
AMN  
AMN1  
AMOT  
AMOTL1  
AMOTL2  
AMPD2  
AMPD3  
AMT  
AMY1A  
AMY1B  
AMY1C  
AMY2B  
AMZ1  
AMZ2  
AMZ2P1  
AMZ2P2  
ANAPC1  
ANAPC10  
ANAPC11  
ANAPC13  
ANAPC15  
ANAPC16  
ANAPC1P1  
ANAPC1P2  
ANAPC1P4  
ANAPC2  
ANAPC4  
ANAPC5  
ANAPC7  
ANG  
ANGEL1  
ANGEL2  
ANGPT1  
ANGPT2  
ANGPT4  
ANGPTL1  
ANGPTL2  
ANGPTL4  
ANK1  
ANK2  
ANK3  
ANKAR  
ANKDD1A  
ANKDD1B

ANKEF1  
ANKFN1  
ANKFY1  
ANKH  
ANKHD1  
ANKHD1-EIF4EBP3  
ANKIB1  
ANKK1  
ANKLE2  
ANKMY1  
ANKMY2  
ANKRA2  
ANKRD10  
ANKRD11  
ANKRD12  
ANKRD13A  
ANKRD13C  
ANKRD13D  
ANKRD16  
ANKRD17  
ANKRD18A  
ANKRD18B  
ANKRD18CP  
ANKRD18EP  
ANKRD20A1  
ANKRD20A11P  
ANKRD20A19P  
ANKRD20A21P  
ANKRD20A3P  
ANKRD20A4P  
ANKRD20A5P  
ANKRD20A8P  
ANKRD22  
ANKRD23  
ANKRD24  
ANKRD26  
ANKRD27  
ANKRD28  
ANKRD29  
ANKRD30B  
ANKRD30BL  
ANKRD30BP2  
ANKRD31  
ANKRD33B  
ANKRD34A  
ANKRD35  
ANKRD36  
ANKRD36B  
ANKRD36BP1  
ANKRD36BP2  
ANKRD36C  
ANKRD37  
ANKRD39  
ANKRD40  
ANKRD40CL  
ANKRD42  
ANKRD44  
ANKRD45

ANKRD46  
ANKRD49  
ANKRD49P1  
ANKRD50  
ANKRD52  
ANKRD54  
ANKRD6  
ANKRD62  
ANKRD65  
ANKRD66  
ANKRD9  
ANKS1A  
ANKS1B  
ANKS3  
ANKS4B  
ANKS6  
ANKUB1  
ANKZF1  
ANLN  
ANO1  
ANO10  
ANO4  
ANO6  
ANO8  
ANO9  
ANOS1  
ANP32A  
ANP32B  
ANP32E  
ANPEP  
ANTKMT  
ANTXR1  
ANTXR2  
ANXA1  
ANXA11  
ANXA13  
ANXA2  
ANXA2P2  
ANXA2R  
ANXA3  
ANXA4  
ANXA5  
ANXA6  
ANXA7  
ANXA8  
ANXA8L1  
ANXA9  
AOAH  
AOC1  
AOC2  
AOC3  
AOPEP  
AOX2P  
AP000295.1  
AP000311.1  
AP000346.2  
AP000347.1  
AP000769.1

AP001885.1  
AP001931.1  
AP001992.1  
AP002008.2  
AP002414.2  
AP002495.1  
AP002748.5  
AP002981.1  
AP002990.1  
AP003084.1  
AP003108.2  
AP003170.1  
AP003419.1  
AP004289.1  
AP005061.2  
AP005901.1  
AP006222.1  
AP006285.2  
AP1AR  
AP1B1  
AP1G1  
AP1G2  
AP1M1  
AP1M2  
AP1S1  
AP1S2  
AP1S3  
AP2A1  
AP2A2  
AP2B1  
AP2M1  
AP2S1  
AP3B1  
AP3B2  
AP3D1  
AP3M1  
AP3M2  
AP3S1  
AP3S2  
AP4B1  
AP4E1  
AP4M1  
AP4S1  
AP5B1  
AP5M1  
AP5S1  
AP5Z1  
APAF1  
APBA1  
APBA2  
APBA3  
APBB1  
APBB1IP  
APBB2  
APBB3  
APC  
APC2  
APCDD1

APEH  
APELA  
APEX1  
APEX2  
APH1A  
APH1B  
API5  
APIP  
APLF  
APLP1  
APLP2  
APMAP  
APOA2  
APOB  
APOBEC3A  
APOBEC3B  
APOBEC3C  
APOBEC3D  
APOBEC3F  
APOBEC3G  
APOBEC4  
APOBR  
APOC1  
APOD  
APOE  
APOL1  
APOL2  
APOL3  
APOL4  
APOL6  
APOLD1  
APOM  
APOO  
APOOL  
APP  
APPBP2  
APPL1  
APPL2  
APRT  
APTX  
AQP1  
AQP11  
AQP3  
AQP4  
AQP5  
AQP6  
AQP7  
AQP9  
AQR  
AR  
ARAF  
ARAP1  
ARAP2  
ARAP3  
ARC  
ARCN1  
AREG  
AREL1

ARF1  
ARF3  
ARF4  
ARF5  
ARF6  
ARFGAP1  
ARFGAP2  
ARFGAP3  
ARFGEF1  
ARFGEF2  
ARFGEF3  
ARFIP1  
ARFIP2  
ARFRP1  
ARG1  
ARG2  
ARGFXP2  
ARGLU1  
ARHGAP1  
ARHGAP10  
ARHGAP11A  
ARHGAP12  
ARHGAP15  
ARHGAP17  
ARHGAP18  
ARHGAP19  
ARHGAP19-SLIT1  
ARHGAP20  
ARHGAP21  
ARHGAP22  
ARHGAP23  
ARHGAP24  
ARHGAP25  
ARHGAP26  
ARHGAP27  
ARHGAP28  
ARHGAP29  
ARHGAP30  
ARHGAP31  
ARHGAP32  
ARHGAP33  
ARHGAP35  
ARHGAP39  
ARHGAP4  
ARHGAP42  
ARHGAP42P4  
ARHGAP44  
ARHGAP45  
ARHGAP5  
ARHGAP6  
ARHGAP8  
ARHGAP9  
ARHGDIA  
ARHGDIB  
ARHGEF1  
ARHGEF10  
ARHGEF10L  
ARHGEF11

ARHGEF12  
ARHGEF16  
ARHGEF17  
ARHGEF18  
ARHGEF19  
ARHGEF2  
ARHGEF26  
ARHGEF28  
ARHGEF3  
ARHGEF33  
ARHGEF34P  
ARHGEF35  
ARHGEF37  
ARHGEF38  
ARHGEF39  
ARHGEF4  
ARHGEF40  
ARHGEF5  
ARHGEF6  
ARHGEF7  
ARHGEF9  
ARID1A  
ARID1B  
ARID2  
ARID3A  
ARID3B  
ARID4A  
ARID4B  
ARID5A  
ARID5B  
ARIH1  
ARIH2  
ARL1  
ARL10  
ARL11  
ARL13B  
ARL14EP  
ARL15  
ARL16  
ARL17A  
ARL17B  
ARL2  
ARL2BP  
ARL3  
ARL4A  
ARL4C  
ARL4D  
ARL5A  
ARL5B  
ARL6  
ARL6IP1  
ARL6IP4  
ARL6IP5  
ARL6IP6  
ARL8A  
ARL8B  
ARMC1  
ARMC10



ARMC2  
ARMC3  
ARMC4  
ARMC5  
ARMC6  
ARMC7  
ARMC8  
ARMC9  
ARMCX2  
ARMCX3  
ARMCX4  
ARMCX5  
ARMCX6  
ARMCX7P  
ARMH1  
ARMH3  
ARMH4  
ARMT1  
ARNT  
ARNT2  
ARNTL  
ARNTL2  
ARPC1A  
ARPC1B  
ARPC2  
ARPC3  
ARPC4  
ARPC4-TTLL3  
ARPC5  
ARPC5L  
ARPIN  
ARPIN-AP3S2  
ARPP19  
ARRB1  
ARRB2  
ARRDC1  
ARRDC2  
ARRDC3  
ARRDC4  
ARSA  
ARSB  
ARSD  
ARSG  
ARSJ  
ARSK  
ART3  
ART4  
ARV1  
ARVCF  
ARX  
AS3MT  
ASAH1  
ASAH2  
ASAH2B  
ASAP1  
ASAP2  
ASAP3  
ASB1

ASB13  
ASB14  
ASB16  
ASB18  
ASB2  
ASB3  
ASB4  
ASB6  
ASB7  
ASB8  
ASB9  
ASCC1  
ASCC2  
ASCC3  
ASCL3  
ASF1A  
ASF1B  
ASGR1  
ASH1L  
ASH2L  
ASIC1  
ASIC3  
ASL  
ASMTL  
ASNS  
ASNSD1  
ASPA  
ASPH  
ASPHD2  
ASPM  
ASPRV1  
ASPSCR1  
ASRGL1  
ASS1  
ASS1P2  
ASTE1  
ASTL  
ASTN2  
ASXL1  
ASXL2  
ASXL3  
ASZ1  
ATAD1  
ATAD2  
ATAD2B  
ATAD3A  
ATAD3B  
ATAD3C  
ATAD5  
ATAT1  
ATCAY  
ATE1  
ATF1  
ATF2  
ATF3  
ATF4  
ATF5  
ATF6

ATF6B  
ATF7  
ATF7-NPFF  
ATF7IP  
ATF7IP2  
ATG10  
ATG101  
ATG12  
ATG13  
ATG14  
ATG16L1  
ATG16L2  
ATG2A  
ATG2B  
ATG3  
ATG4A  
ATG4B  
ATG4C  
ATG4D  
ATG5  
ATG7  
ATG9A  
ATG9B  
ATIC  
ATL1  
ATL2  
ATL3  
ATM  
ATMIN  
ATN1  
ATOH8  
ATOX1  
ATP10A  
ATP10B  
ATP10D  
ATP11A  
ATP11B  
ATP11C  
ATP12A  
ATP13A1  
ATP13A2  
ATP13A3  
ATP13A4  
ATP13A5  
ATP1A1  
ATP1A4  
ATP1B1  
ATP1B2  
ATP1B3  
ATP1B4  
ATP23  
ATP2A1  
ATP2A2  
ATP2A3  
ATP2B1  
ATP2B2  
ATP2B4  
ATP2C1

ATP2C2  
ATP5F1A  
ATP5F1AP10  
ATP5F1B  
ATP5F1BP1  
ATP5F1C  
ATP5F1D  
ATP5F1E  
ATP5IF1  
ATP5MC1  
ATP5MC2  
ATP5MC3  
ATP5MD  
ATP5ME  
ATP5MF  
ATP5MG  
ATP5MPL  
ATP5PB  
ATP5PD  
ATP5PF  
ATP5PO  
ATP6AP1  
ATP6AP1L  
ATP6AP2  
ATP6V0A1  
ATP6V0A2  
ATP6V0A4  
ATP6V0B  
ATP6V0C  
ATP6V0D1  
ATP6V0D2  
ATP6V0E1  
ATP6V0E2  
ATP6V1A  
ATP6V1B1  
ATP6V1B2  
ATP6V1C1  
ATP6V1C2  
ATP6V1D  
ATP6V1E1  
ATP6V1E2  
ATP6V1F  
ATP6V1G1  
ATP6V1H  
ATP7A  
ATP7B  
ATP8A1  
ATP8A2  
ATP8A2P2  
ATP8B1  
ATP8B2  
ATP8B3  
ATP8B4  
ATP9A  
ATP9B  
ATPAF1  
ATPAF2  
ATPSCKMT

ATR  
ATRAID  
ATRIP  
ATRN  
ATRX  
ATXN1  
ATXN10  
ATXN1L  
ATXN2  
ATXN2L  
ATXN3  
ATXN7  
ATXN7L1  
ATXN7L2  
ATXN7L3  
ATXN7L3B  
AUH  
AUNIP  
AUP1  
AURKA  
AURKAIP1  
AURKB  
AUTS2  
AVEN  
AVIL  
AVL9  
AVPI1  
AVPR1A  
AXDND1  
AXIN1  
AXIN2  
AXL  
AZGP1  
AZI2  
AZIN1  
AZIN2  
B2M  
B3GALNT1  
B3GALNT2  
B3GALT1  
B3GALT2  
B3GALT4  
B3GALT5  
B3GALT6  
B3GAT1  
B3GAT2  
B3GAT3  
B3GLCT  
B3GNT10  
B3GNT2  
B3GNT3  
B3GNT4  
B3GNT5  
B3GNT6  
B3GNT7  
B3GNT8  
B3GNT9  
B3GNTL1

B4GALNT2  
B4GALNT3  
B4GALT1  
B4GALT2  
B4GALT3  
B4GALT4  
B4GALT5  
B4GALT6  
B4GALT7  
B4GAT1  
B9D1  
B9D2  
BAALC  
BABAM1  
BABAM2  
BACE1  
BACE2  
BACH1  
BACH2  
BAD  
BAG1  
BAG2  
BAG3  
BAG4  
BAG5  
BAG6  
BAGE2  
BAHCC1  
BAHD1  
BAIAP2  
BAIAP2L1  
BAIAP3  
BAK1  
BAMBI  
BANF1  
BANK1  
BANP  
BAP1  
BARD1  
BARX2  
BASP1  
BATF  
BATF2  
BAX  
BAZ1A  
BAZ1B  
BAZ2A  
BAZ2B  
BBC3  
BBIP1  
BBOF1  
BBOX1  
BBS1  
BBS12  
BBS2  
BBS4  
BBS5  
BBS7

BBS9  
BBX  
BCAM  
BCAP29  
BCAP31  
BCAR1  
BCAR3  
BCAS1  
BCAS2  
BCAS2P2  
BCAS3  
BCAS4  
BCAT1  
BCAT2  
BCCIP  
BCDIN3D  
BCKDHA  
BCKDHB  
BCKDK  
BCL10  
BCL11A  
BCL11B  
BCL2  
BCL2A1  
BCL2L1  
BCL2L11  
BCL2L12  
BCL2L13  
BCL2L14  
BCL2L15  
BCL2L2  
BCL2L2-PABPN1  
BCL3  
BCL6  
BCL7A  
BCL7B  
BCL7C  
BCL9  
BCL9L  
BCLAF1  
BCLAF3  
BCO1  
BCO2  
BCOR  
BCORL1  
BCORP1  
BCR  
BCRP2  
BCS1L  
BDH1  
BDH2  
BDKRB1  
BDKRB2  
BDNF  
BDP1  
BEAN1  
BECN1  
BEGAIN

BEND2  
BEND3  
BEND3P1  
BEND4  
BEND5  
BEND6  
BEND7  
BEST1  
BEST3  
BEST4  
BET1  
BET1L  
BEX2  
BEX3  
BEX4  
BFAR  
BGN  
BHLHB9  
BHLHE40  
BHLHE41  
BHMT  
BHMT2  
BICC1  
BICD1  
BICD2  
BICDL1  
BICDL2  
BICRA  
BICRAL  
BID  
BIK  
BIN1  
BIN2  
BIN3  
BIRC2  
BIRC3  
BIRC5  
BIRC6  
BIVM  
BLACAT1  
BLCAP  
BLK  
BLM  
BLMH  
BLNK  
BLOC1S1  
BLOC1S2  
BLOC1S3  
BLOC1S4  
BLOC1S5  
BLOC1S6  
BLVRA  
BLVRB  
BLZF1  
BMERB1  
BMF  
BMI1  
BMP1



BMP10  
BMP2K  
BMP3  
BMP4  
BMP6  
BMP7  
BMP8A  
BMP8B  
BMPR1A  
BMPR1B  
BMPR2  
BMS1  
BMS1P1  
BMS1P17  
BMS1P2  
BMS1P4  
BMS1P7  
BMT2  
BMX  
BNC1  
BNC2  
BNIP1  
BNIP2  
BNIP3  
BNIP3L  
BNIP3P28  
BNIPL  
BOC  
BOD1  
BOD1L1  
BOK  
BOLA1  
BOLA2  
BOLA2-SMG1P6  
BOLA2B  
BOLA3  
BOLL  
BOP1  
BORCS5  
BORCS6  
BORCS7  
BORCS8  
BORCS8-MEF2B  
BPGM  
BPHL  
BPI  
BPIFA1  
BPIFA2  
BPIFB1  
BPIFB2  
BPNT1  
BPTF  
BPTFP1  
BRAF  
BRAP  
BRAT1  
BRCA1  
BRCA2

BRCC3  
BRD1  
BRD2  
BRD3  
BRD3OS  
BRD4  
BRD7  
BRD7P4  
BRD8  
BRD9  
BRF1  
BRF2  
BRI3  
BRI3BP  
BRIP1  
BRIX1  
BRK1  
BRMS1  
BRMS1L  
BROX  
BRPF1  
BRPF3  
BRWD1  
BRWD3  
BSCL2  
BSDC1  
BSG  
BSN  
BSPRY  
BST1  
BST2  
BTAF1  
BTBD1  
BTBD10  
BTBD11  
BTBD18  
BTBD19  
BTBD2  
BTBD3  
BTBD6  
BTBD7  
BTBD7P1  
BTBD8  
BTBD9  
BTC  
BTD  
BTF3  
BTF3L4  
BTG1  
BTG2  
BTG3  
BTG4  
BTK  
BTLA  
BTN2A1  
BTN2A2  
BTN2A3P  
BTN3A1

BTN3A2  
BTN3A3  
BTNL3  
BTNL8  
BTNL9  
BTRC  
BUB1  
BUB1B  
BUB3  
BUD13  
BUD23  
BUD31  
BVES  
BX004987.1  
BX005195.1  
BX284613.1  
BX322639.1  
BYSL  
BZW1  
BZW1P2  
BZW2  
C10orf105  
C10orf53  
C10orf55  
C10orf67  
C10orf82  
C10orf88  
C10orf95  
C11orf1  
C11orf16  
C11orf21  
C11orf24  
C11orf45  
C11orf49  
C11orf52  
C11orf54  
C11orf58  
C11orf65  
C11orf68  
C11orf71  
C11orf80  
C11orf88  
C11orf95  
C11orf97  
C11orf98  
C12orf10  
C12orf29  
C12orf4  
C12orf40  
C12orf43  
C12orf45  
C12orf49  
C12orf50  
C12orf57  
C12orf60  
C12orf65  
C12orf66  
C12orf73

C12orf75  
C12orf76  
C13orf42  
C13orf46  
C14orf119  
C14orf132  
C14orf28  
C14orf39  
C14orf93  
C15orf39  
C15orf40  
C15orf41  
C15orf48  
C15orf61  
C15orf62  
C15orf65  
C16orf46  
C16orf54  
C16orf58  
C16orf70  
C16orf71  
C16orf72  
C16orf74  
C16orf87  
C16orf89  
C16orf91  
C16orf95  
C17orf100  
C17orf107  
C17orf113  
C17orf49  
C17orf58  
C17orf67  
C17orf75  
C17orf80  
C17orf97  
C18orf21  
C18orf25  
C18orf32  
C18orf54  
C19orf12  
C19orf25  
C19orf33  
C19orf38  
C19orf44  
C19orf47  
C19orf48  
C19orf53  
C19orf54  
C1D  
C1GALT1  
C1GALT1C1  
C1GALT1C1L  
C1orf109  
C1orf112  
C1orf115  
C1orf116  
C1orf122

C1orf127  
C1orf131  
C1orf141  
C1orf146  
C1orf158  
C1orf159  
C1orf162  
C1orf167  
C1orf174  
C1orf189  
C1orf194  
C1orf198  
C1orf21  
C1orf210  
C1orf216  
C1orf226  
C1orf35  
C1orf43  
C1orf50  
C1orf52  
C1orf54  
C1orf56  
C1orf61  
C1orf74  
C1orf87  
C1QA  
C1QB  
C1QBP  
C1QC  
C1QL3  
C1QTNF1  
C1QTNF3  
C1QTNF5  
C1QTNF6  
C1QTNF7  
C1R  
C1RL  
C1S  
C2  
C20orf194  
C20orf27  
C20orf85  
C20orf96  
C21orf58  
C21orf62  
C21orf91  
C22orf15  
C22orf23  
C22orf39  
C22orf46  
C2CD2  
C2CD2L  
C2CD3  
C2CD4A  
C2CD4B  
C2CD5  
C2orf15  
C2orf16

C2orf27A  
C2orf42  
C2orf49  
C2orf50  
C2orf66  
C2orf68  
C2orf69  
C2orf73  
C2orf74  
C2orf76  
C2orf83  
C2orf88  
C2orf91  
C2orf92  
C3  
C3AR1  
C3orf14  
C3orf18  
C3orf20  
C3orf33  
C3orf38  
C3orf52  
C3orf62  
C3orf67  
C3orf70  
C3orf86  
C4A  
C4B  
C4B\_2  
C4BPA  
C4BPB  
C4orf17  
C4orf19  
C4orf3  
C4orf33  
C4orf36  
C4orf46  
C4orf47  
C5  
C5AR1  
C5AR2  
C5orf15  
C5orf22  
C5orf24  
C5orf34  
C5orf49  
C5orf51  
C5orf58  
C5orf63  
C6  
C6orf118  
C6orf120  
C6orf132  
C6orf136  
C6orf141  
C6orf163  
C6orf223  
C6orf47

C6orf62  
C6orf89  
C7  
C7orf25  
C7orf26  
C7orf31  
C7orf50  
C7orf57  
C8orf33  
C8orf34  
C8orf37  
C8orf58  
C8orf76  
C8orf82  
C9orf116  
C9orf131  
C9orf135  
C9orf152  
C9orf16  
C9orf24  
C9orf40  
C9orf43  
C9orf64  
C9orf72  
C9orf78  
C9orf85  
CA1  
CA12  
CA13  
CA14  
CA2  
CA4  
CA5A  
CA5B  
CA5BP1  
CA6  
CA8  
CAAP1  
CAB39  
CAB39L  
CABCOCO1  
CABIN1  
CABLES1  
CABLES2  
CABP1  
CABP4  
CABYR  
CACFD1  
CACHD1  
CACNA1A  
CACNA1B  
CACNA1D  
CACNA1E  
CACNA1F  
CACNA2D1  
CACNA2D2  
CACNA2D3  
CACNB1

CACNB2  
CACNB3  
CACNB4  
CACNG4  
CACNG6  
CACNG8  
CACTIN  
CACUL1  
CACYBP  
CAD  
CADM1  
CADM4  
CADPS  
CADPS2  
CALB1  
CALCOCO1  
CALCOCO2  
CALCRL  
CALD1  
CALHM2  
CALHM5  
CALHM6  
CALM1  
CALM2  
CALM3  
CALML3  
CALML4  
CALN1  
CALR  
CALU  
CAMK1  
CAMK1D  
CAMK1G  
CAMK2B  
CAMK2D  
CAMK2G  
CAMK2N1  
CAMK4  
CAMKK1  
CAMKK2  
CAMKMT  
CAMLG  
CAMSAP1  
CAMSAP2  
CAMSAP3  
CAMTA1  
CAMTA2  
CAND1  
CAND2  
CANT1  
CANX  
CAP1  
CAP2  
CAPG  
CAPN1  
CAPN10  
CAPN12  
CAPN13



CAPN14  
CAPN15  
CAPN2  
CAPN3  
CAPN5  
CAPN7  
CAPN8  
CAPN9  
CAPNS1  
CAPRIN1  
CAPRIN2  
CAPS  
CAPS2  
CAPSL  
CAPZA1  
CAPZA2  
CAPZB  
CARD10  
CARD11  
CARD14  
CARD16  
CARD19  
CARD6  
CARD8  
CARD9  
CARF  
CARHSP1  
CARM1  
CARMIL1  
CARMIL2  
CARNMT1  
CARNS1  
CARS1  
CARS2  
CASC1  
CASC3  
CASC4  
CASD1  
CASK  
CASKIN2  
CASP1  
CASP10  
CASP14  
CASP16P  
CASP17P  
CASP2  
CASP3  
CASP4  
CASP5  
CASP6  
CASP7  
CASP8  
CASP8AP2  
CASP9  
CASS4  
CAST  
CASTOR1  
CASTOR2

CASTOR3  
CASZ1  
CAT  
CATIP  
CATSPER2  
CATSPER2P1  
CATSPERB  
CATSPERD  
CATSPERE  
CATSPERG  
CAV1  
CAV2  
CAVIN1  
CAVIN2  
CBFA2T2  
CBFA2T3  
CBFB  
CBL  
CBLB  
CBLC  
CBLL1  
CBLN3  
CBR1  
CBR3  
CBR4  
CBS  
CBWD1  
CBWD2  
CBWD3  
CBWD5  
CBWD6  
CBX1  
CBX3  
CBX4  
CBX5  
CBX6  
CBX7  
CBY1  
CC2D1A  
CC2D1B  
CC2D2A  
CC2D2B  
CCAR1  
CCAR2  
CCBE1  
CCDC102A  
CCDC102B  
CCDC103  
CCDC106  
CCDC107  
CCDC110  
CCDC112  
CCDC113  
CCDC114  
CCDC115  
CCDC117  
CCDC12  
CCDC120

CCDC121  
CCDC122  
CCDC124  
CCDC125  
CCDC126  
CCDC127  
CCDC13  
CCDC130  
CCDC134  
CCDC136  
CCDC137  
CCDC138  
CCDC14  
CCDC141  
CCDC142  
CCDC144A  
CCDC144B  
CCDC144CP  
CCDC146  
CCDC148  
CCDC149  
CCDC15  
CCDC150  
CCDC151  
CCDC152  
CCDC153  
CCDC157  
CCDC158  
CCDC159  
CCDC160  
CCDC162P  
CCDC163  
CCDC168  
CCDC169  
CCDC17  
CCDC170  
CCDC171  
CCDC173  
CCDC174  
CCDC175  
CCDC18  
CCDC180  
CCDC181  
CCDC186  
CCDC187  
CCDC189  
CCDC190  
CCDC191  
CCDC198  
CCDC200  
CCDC22  
CCDC24  
CCDC25  
CCDC27  
CCDC28A  
CCDC28A-AS1  
CCDC28B  
CCDC30

CCDC32  
CCDC33  
CCDC34  
CCDC36  
CCDC38  
CCDC39  
CCDC40  
CCDC43  
CCDC47  
CCDC50  
CCDC51  
CCDC57  
CCDC58  
CCDC59  
CCDC6  
CCDC60  
CCDC61  
CCDC62  
CCDC65  
CCDC66  
CCDC68  
CCDC69  
CCDC7  
CCDC71  
CCDC71L  
CCDC73  
CCDC74A  
CCDC74B  
CCDC77  
CCDC78  
CCDC8  
CCDC80  
CCDC81  
CCDC82  
CCDC84  
CCDC85B  
CCDC85C  
CCDC86  
CCDC88A  
CCDC88B  
CCDC88C  
CCDC89  
CCDC9  
CCDC90B  
CCDC91  
CCDC92  
CCDC93  
CCDC96  
CCDC97  
CCDC9B  
CCHCR1  
CCL14  
CCL15  
CCL15-CCL14  
CCL16  
CCL2  
CCL20  
CCL22

CCL28  
CCL3  
CCL3L1  
CCL3L3  
CCL4  
CCL4L2  
CCL5  
CCL8  
CCM2  
CCN1  
CCN2  
CCN3  
CCN4  
CCN5  
CCNA1  
CCNA2  
CCNB1  
CCNB1IP1  
CCNB2  
CCNB3  
CCNB3P1  
CCNC  
CCND1  
CCND2  
CCND3  
CCNDBP1  
CCNE1  
CCNE2  
CCNF  
CCNG1  
CCNG1P1  
CCNG2  
CCNH  
CCNI  
CCNI2  
CCNJ  
CCNJL  
CCNK  
CCNL1  
CCNL2  
CCNO  
CCNQ  
CCNT1  
CCNT2  
CCNY  
CCNYL1  
CCNYL2  
CCP110  
CCPG1  
CCR1  
CCR2  
CCR3  
CCR4  
CCR5  
CCR6  
CCR7  
CCRL2  
CCS

CCSAP  
CCSER1  
CCSER2  
CCT2  
CCT3  
CCT4  
CCT5  
CCT5P1  
CCT6A  
CCT6B  
CCT6P1  
CCT6P3  
CCT7  
CCT7P1  
CCT8  
CCT8P1  
CCZ1  
CCZ1B  
CD101  
CD109  
CD14  
CD151  
CD160  
CD163  
CD163L1  
CD164  
CD164L2  
CD177  
CD180  
CD19  
CD1C  
CD1E  
CD2  
CD200  
CD200R1  
CD200R1L  
CD207  
CD209  
CD22  
CD226  
CD24  
CD244  
CD247  
CD27  
CD274  
CD276  
CD28  
CD2AP  
CD2BP2  
CD300A  
CD300E  
CD300LB  
CD300LF  
CD300LG  
CD302  
CD320  
CD33  
CD34

CD36  
CD37  
CD38  
CD3D  
CD3E  
CD3EAP  
CD3G  
CD4  
CD40  
CD40LG  
CD44  
CD46  
CD46P1  
CD47  
CD48  
CD5  
CD52  
CD53  
CD55  
CD58  
CD59  
CD6  
CD63  
CD68  
CD69  
CD7  
CD72  
CD74  
CD79A  
CD79B  
CD80  
CD81  
CD82  
CD83  
CD84  
CD86  
CD8A  
CD8B  
CD9  
CD93  
CD96  
CD99  
CD99L2  
CD99P1  
CDA  
CDADC1  
CDAN1  
CDC123  
CDC14A  
CDC14B  
CDC16  
CDC20  
CDC20B  
CDC23  
CDC25A  
CDC25B  
CDC26  
CDC27

CDC27P1  
CDC34  
CDC37  
CDC37L1  
CDC40  
CDC42  
CDC42BPA  
CDC42BPB  
CDC42BPG  
CDC42EP1  
CDC42EP2  
CDC42EP3  
CDC42EP4  
CDC42SE1  
CDC42SE2  
CDC5L  
CDC6  
CDC7  
CDC73  
CDCA2  
CDCA3  
CDCA4  
CDCA7  
CDCA7L  
CDCA8  
CDCP1  
CDH1  
CDH11  
CDH12  
CDH13  
CDH15  
CDH17  
CDH18  
CDH19  
CDH2  
CDH23  
CDH24  
CDH26  
CDH3  
CDH4  
CDH6  
CDH7  
CDH8  
CDHR3  
CDHR4  
CDIP1  
CDIPT  
CDK1  
CDK10  
CDK11A  
CDK11B  
CDK12  
CDK13  
CDK14  
CDK15  
CDK16  
CDK17  
CDK18



CDK19  
CDK2  
CDK20  
CDK2AP1  
CDK2AP2  
CDK4  
CDK5  
CDK5R1  
CDK5RAP1  
CDK5RAP2  
CDK5RAP3  
CDK6  
CDK7  
CDK8  
CDK9  
CDKAL1  
CDKL1  
CDKL2  
CDKL3  
CDKL5  
CDKN1A  
CDKN1B  
CDKN1C  
CDKN2A  
CDKN2AIP  
CDKN2AIPNL  
CDKN2B  
CDKN2C  
CDKN2D  
CDNF  
CDON  
CDR2  
CDR2L  
CDRT1  
CDRT4  
CDS1  
CDS2  
CDT1  
CDV3  
CDYL  
CDYL2  
CEACAM1  
CEACAM19  
CEACAM22P  
CEACAM3  
CEACAM4  
CEACAM5  
CEACAM6  
CEACAM7  
CEACAM8  
CEBPA  
CEBPB  
CEBPD  
CEBPG  
CEBPZ  
CEBPZOS  
CECR2  
CECR7

CEL  
CELF1  
CELF2  
CELF5  
CELF6  
CELP  
CELSR1  
CELSR2  
CELSR3  
CEMIP  
CEMIP2  
CENPB  
CENPBD1P1  
CENPC  
CENPE  
CENPF  
CENPH  
CENPI  
CENPJ  
CENPK  
CENPL  
CENPM  
CENPN  
CENPNP1  
CENPO  
CENPP  
CENPQ  
CENPS  
CENPS-CORT  
CENPT  
CENPU  
CENPUP2  
CENPV  
CENPX  
CEP104  
CEP112  
CEP120  
CEP126  
CEP128  
CEP131  
CEP135  
CEP152  
CEP162  
CEP164  
CEP164P1  
CEP170  
CEP170B  
CEP170P1  
CEP19  
CEP192  
CEP250  
CEP290  
CEP295  
CEP295NL  
CEP350  
CEP41  
CEP44  
CEP55

CEP57  
CEP57L1  
CEP63  
CEP68  
CEP70  
CEP72  
CEP76  
CEP78  
CEP83  
CEP85  
CEP85L  
CEP89  
CEP95  
CEP97  
CEPT1  
CERCAM  
CERK  
CERKL  
CERS2  
CERS3  
CERS4  
CERS5  
CERS6  
CERT1  
CES1  
CES1P1  
CES2  
CES3  
CES4A  
CETN2  
CETN3  
CFAP100  
CFAP126  
CFAP157  
CFAP161  
CFAP20  
CFAP206  
CFAP221  
CFAP298  
CFAP298-TCP10L  
CFAP299  
CFAP300  
CFAP36  
CFAP410  
CFAP43  
CFAP44  
CFAP45  
CFAP46  
CFAP47  
CFAP52  
CFAP53  
CFAP54  
CFAP57  
CFAP58  
CFAP61  
CFAP65  
CFAP69  
CFAP70

CFAP73  
CFAP74  
CFAP77  
CFAP97  
CFAP97D1  
CFAP97D2  
CFAP99  
CFB  
CFD  
CFDP1  
CFH  
CFI  
CFL1  
CFL1P1  
CFL1P5  
CFL2  
CFLAR  
CFP  
CFTR  
CGAS  
CGGBP1  
CGN  
CGNL1  
CGRRF1  
CH25H  
CHAC1  
CHAD  
CHAF1A  
CHAF1B  
CHAMP1  
CHCHD1  
CHCHD10  
CHCHD2  
CHCHD3  
CHCHD4  
CHCHD5  
CHCHD6  
CHCHD7  
CHD1  
CHD1L  
CHD2  
CHD3  
CHD4  
CHD5  
CHD6  
CHD7  
CHD8  
CHD9  
CHDH  
CHEK1  
CHEK2  
CHERP  
CHFR  
CHGB  
CHI3L1  
CHI3L2  
CHIAP2  
CHIC1

CHIC2  
CHID1  
CHIT1  
CHKA  
CHKB  
CHKB-CPT1B  
CHL1  
CHM  
CHML  
CHMP1A  
CHMP1B  
CHMP1B2P  
CHMP2A  
CHMP2B  
CHMP3  
CHMP4A  
CHMP4B  
CHMP4C  
CHMP5  
CHMP6  
CHMP7  
CHN1  
CHN2  
CHODL  
CHORDC1  
CHORDC1P3  
CHORDC1P4  
CHP1  
CHP2  
CHPF  
CHPF2  
CHPT1  
CHRA1  
CHRD1  
CHRM3  
CHRM5  
CHRNA10  
CHRNA2  
CHRNA4  
CHRNA5  
CHRNA7  
CHRNA9  
CHRNA1  
CHRNA2  
CHRNA3  
CHRNA4  
CHST1  
CHST10  
CHST11  
CHST12  
CHST14  
CHST15  
CHST2  
CHST3  
CHST4  
CHST5  
CHST6  
CHST7

CHST9  
CHSY1  
CHTF18  
CHTF8  
CHTOP  
CHUK  
CHURC1  
CHURC1-FNTB  
CIAO1  
CIAO2A  
CIAO2B  
CIAO3  
CIAPIN1  
CIART  
CIB1  
CIB2  
CIC  
CICP14  
CICP27  
CIDEB  
CIDECP1  
CIITA  
CILK1  
CINP  
CIP2A  
CIPC  
CIR1  
CIRBP  
CISD1  
CISD2  
CISD3  
CISH  
CIT  
CITED2  
CITED4  
CIZ1  
CKAP2  
CKAP2L  
CKAP4  
CKAP5  
CKB  
CKLF  
CKLF-CMTM1  
CKMT1A  
CKMT1B  
CKS1B  
CKS2  
CLASP1  
CLASP2  
CLASRP  
CLBA1  
CLCA2  
CLCA3P  
CLCA4  
CLCC1  
CLCF1  
CLCN2  
CLCN3

CLCN4  
CLCN5  
CLCN6  
CLCN7  
CLCNKA  
CLCNKB  
CLDN1  
CLDN10  
CLDN11  
CLDN12  
CLDN15  
CLDN16  
CLDN18  
CLDN22  
CLDN23  
CLDN3  
CLDN4  
CLDN7  
CLDN8  
CLDN9  
CLDND1  
CLEC12A  
CLEC12B  
CLEC16A  
CLEC17A  
CLEC18A  
CLEC1A  
CLEC1B  
CLEC2B  
CLEC2D  
CLEC4A  
CLEC4D  
CLEC4E  
CLEC5A  
CLEC7A  
CLEC9A  
CLECL1  
CLGN  
CLHC1  
CLIC1  
CLIC2  
CLIC3  
CLIC4  
CLIC5  
CLIC6  
CLINT1  
CLIP1  
CLIP2  
CLIP4  
CLK1  
CLK2  
CLK3  
CLK4  
CLMN  
CLMP  
CLN3  
CLN5  
CLN6

CLN8  
CLNK  
CLNS1A  
CLOCK  
CLP1  
CLPB  
CLPP  
CLPTM1  
CLPTM1L  
CLPX  
CLSPN  
CLSTN1  
CLSTN2  
CLSTN3  
CLTA  
CLTB  
CLTC  
CLTCL1  
CLU  
CLUAP1  
CLUH  
CLUHP3  
CLUL1  
CLVS1  
CLYBL  
CMAHP  
CMAS  
CMBL  
CMC1  
CMC2  
CMC4  
CMIP  
CMKLR1  
CMPK1  
CMPK2  
CMSS1  
CMTM2  
CMTM3  
CMTM4  
CMTM6  
CMTM7  
CMTM8  
CMTR1  
CMTR2  
CMYA5  
CNBD2  
CNBP  
CNDP1  
CNDP2  
CNEP1R1  
CNFN  
CNGA1  
CNGA3  
CNGA4  
CNGB1  
CNIH1  
CNIH3  
CNIH4



CNKS1R1  
CNKS1R3  
CNN1  
CNN2  
CNN3  
CNNM1  
CNNM2  
CNNM3  
CNNM4  
CNOT1  
CNOT10  
CNOT11  
CNOT2  
CNOT3  
CNOT4  
CNOT6  
CNOT6L  
CNOT7  
CNOT8  
CNOT9  
CNP  
CNPPD1  
CNPY2  
CNPY3  
CNPY4  
CNR1  
CNR2  
CNST  
CNTD1  
CNTF  
CNTLN  
CNTN2  
CNTN3  
CNTN4  
CNTN5  
CNTNAP1  
CNTNAP2  
CNTNAP3  
CNTNAP3B  
CNTNAP3C  
CNTNAP5  
CNTRL  
CNTROB  
COA1  
COA3  
COA4  
COA5  
COA6  
COA7  
COA8  
COASY  
COBL  
COBLL1  
COCH  
COG1  
COG2  
COG3  
COG4

COG5  
COG6  
COG7  
COG8  
COIL  
COL10A1  
COL12A1  
COL14A1  
COL16A1  
COL17A1  
COL18A1  
COL19A1  
COL1A1  
COL1A2  
COL21A1  
COL24A1  
COL27A1  
COL28A1  
COL3A1  
COL4A2  
COL4A3  
COL4A4  
COL4A5  
COL4A6  
COL5A1  
COL6A1  
COL6A3  
COL6A6  
COL7A1  
COL8A1  
COL8A2  
COL9A1  
COL9A2  
COL9A3  
COLCA2  
COLEC10  
COLEC12  
COLGALT1  
COLGALT2  
COLQ  
COMMD1  
COMMD10  
COMMD2  
COMMD3  
COMMD3-BMI1  
COMMD4  
COMMD5  
COMMD6  
COMMD7  
COMMD8  
COMMD9  
COMP  
COMT  
COMTD1  
COP1  
COPA  
COPB1  
COPB2

COPE  
COPG1  
COPG2  
COPRS  
COPS2  
COPS3  
COPS4  
COPS5  
COPS6  
COPS7A  
COPS7B  
COPS8  
COPS9  
COPZ1  
COPZ2  
COQ10A  
COQ10B  
COQ2  
COQ3  
COQ4  
COQ5  
COQ6  
COQ7  
COQ8A  
COQ8B  
COQ9  
CORIN  
CORO1A  
CORO1B  
CORO1C  
CORO2A  
CORO2B  
CORO6  
CORO7  
CORO7-PAM16  
COTL1  
COX10  
COX11  
COX14  
COX15  
COX16  
COX17  
COX18  
COX19  
COX20  
COX4I1  
COX5A  
COX5B  
COX6A1  
COX6B1  
COX6B2  
COX6C  
COX7A2  
COX7A2L  
COX7B  
COX7C  
COX8A  
CP

CPA3  
CPA4  
CPAMD8  
CPD  
CPEB1  
CPEB2  
CPEB3  
CPEB4  
CPED1  
CPLANE1  
CPLANE2  
CPM  
CPN2  
CPNE1  
CPNE2  
CPNE3  
CPNE4  
CPNE5  
CPNE8  
CPOX  
CPPED1  
CPQ  
CPS1  
CPSF1  
CPSF2  
CPSF3  
CPSF4  
CPSF6  
CPSF7  
CPT1A  
CPT1B  
CPT1C  
CPT2  
CPTP  
CPVL  
CPXM2  
CR1  
CR1L  
CR2  
CR382285.1  
CR383656.13  
CR759762.1  
CR788268.1  
CRABP2  
CRACD  
CRACR2A  
CRACR2B  
CRADD  
CRAMP1  
CRAT  
CRB1  
CRB2  
CRB3  
CRBN  
CRCP  
CREB1  
CREB3  
CREB3L1

CREB3L2  
CREB3L4  
CREB5  
CREBBP  
CREBL2  
CREBRF  
CREBZF  
CREG1  
CREG2  
CRELD1  
CRELD2  
CREM  
CRIM1  
CRIP1  
CRIP2  
CRIPT  
CRISP3  
CRISPLD1  
CRISPLD2  
CRK  
CRKL  
CRLF1  
CRLF3  
CRLS1  
CRMP1  
CRNKL1  
CRNN  
CROCC  
CROCC2  
CROCCP2  
CROCCP3  
CROT  
CRPPA  
CRTAM  
CRTAP  
CRTC1  
CRTC2  
CRTC3  
CRX  
CRY1  
CRY2  
CRYBB2P1  
CRYBG1  
CRYBG2  
CRYBG3  
CRYL1  
CRYM  
CRYM-AS1  
CRYZ  
CRYZL1  
CRYZL2P  
CS  
CSAD  
CSDE1  
CSE1L  
CSF1  
CSF1R  
CSF2RA

CSF2RB  
CSF3  
CSF3R  
CSGALNACT1  
CSGALNACT2  
CSK  
CSKMT  
CSMD1  
CSMD2  
CSMD3  
CSNK1A1  
CSNK1D  
CSNK1E  
CSNK1G1  
CSNK1G2  
CSNK1G3  
CSNK2A1  
CSNK2A2  
CSNK2B  
CSPG4  
CSPG4P10  
CSPG4P11  
CSPG4P12  
CSPP1  
CSRNP1  
CSRNP2  
CSRNP3  
CSRP1  
CSRP2  
CST1  
CST3  
CST7  
CSTA  
CSTB  
CSTF1  
CSTF2  
CSTF2T  
CSTF3  
CT75  
CTAGE3P  
CTAGE4  
CTBP1  
CTBP2  
CTBS  
CTC1  
CTCF  
CTCFL  
CTDNEP1  
CTDP1  
CTDSP1  
CTDSP2  
CTDSPL  
CTDSPL2  
CTF1  
CTH  
CTIF  
CTLA4  
CTNNA1

CTNNAL1  
CTNNB1  
CTNNBIP1  
CTNNBL1  
CTNND1  
CTNS  
CTPS1  
CTPS2  
CTR9  
CTRC  
CTRL  
CTSA  
CTSB  
CTSC  
CTSD  
CTSE  
CTSF  
CTSH  
CTSK  
CTSL  
CTSO  
CTSS  
CTSV  
CTSW  
CTSZ  
CTTN  
CTTNBP2  
CTTNBP2NL  
CTU2  
CTXN1  
CTXND1  
CUBN  
CUEDC1  
CUEDC2  
CUL1  
CUL2  
CUL3  
CUL4A  
CUL4B  
CUL5  
CUL7  
CUL9  
CUTA  
CUTALP  
CUTC  
CUX1  
CWC15  
CWC22  
CWC25  
CWC27  
CWF19L1  
CWF19L2  
CWH43  
CX3CL1  
CX3CR1  
CXADR  
CXCL1  
CXCL10

CXCL11  
CXCL12  
CXCL13  
CXCL16  
CXCL17  
CXCL2  
CXCL3  
CXCL5  
CXCL6  
CXCL8  
CXCL9  
CXCR1  
CXCR2  
CXCR2P1  
CXCR3  
CXCR4  
CXCR5  
CXCR6  
CXorf21  
CXorf38  
CXorf56  
CXXC1  
CXXC4  
CXXC5  
CYB561  
CYB561A3  
CYB561D1  
CYB561D2  
CYB5A  
CYB5AP2  
CYB5B  
CYB5D1  
CYB5D2  
CYB5R1  
CYB5R2  
CYB5R3  
CYB5R4  
CYB5RL  
CYBA  
CYBB  
CYBC1  
CYBRD1  
CYC1  
CYCS  
CYFIP1  
CYFIP2  
CYGB  
CYHR1  
CYLD  
CYP11A1  
CYP19A1  
CYP1A2  
CYP1B1  
CYP20A1  
CYP21A1P  
CYP24A1  
CYP26A1  
CYP27A1



CYP27C1  
CYP2A13  
CYP2A6  
CYP2A7  
CYP2B6  
CYP2B7P  
CYP2C18  
CYP2C19  
CYP2C8  
CYP2C9  
CYP2E1  
CYP2F1  
CYP2G1P  
CYP2G2P  
CYP2J2  
CYP2R1  
CYP2S1  
CYP2U1  
CYP2W1  
CYP39A1  
CYP3A43  
CYP3A5  
CYP46A1  
CYP4A11  
CYP4A22  
CYP4B1  
CYP4F11  
CYP4F12  
CYP4F3  
CYP4F35P  
CYP4F8  
CYP4V2  
CYP4X1  
CYP4Z1  
CYP4Z2P  
CYP51A1  
CYP7B1  
CYP8B1  
CYREN  
CYRIA  
CYRIB  
CYSLTR1  
CYSLTR2  
CYSTM1  
CYTH1  
CYTH2  
CYTH3  
CYTH4  
CYTIP  
CYYR1  
CZIB  
D2HGDH  
DAAM1  
DAAM2  
DAB1  
DAB2  
DAB2IP  
DACH1

DACT2  
DACT3  
DAD1  
DAG1  
DAGLA  
DAGLB  
DALRD3  
DAND5  
DAP  
DAP3  
DAPK1  
DAPK2  
DAPK3  
DAPL1  
DAPP1  
DARS1  
DARS2  
DAW1  
DAXX  
DAZAP1  
DAZAP2  
DBF4  
DBF4B  
DBI  
DBN1  
DBNDD1  
DBNDD2  
DBNL  
DBP  
DBR1  
DBT  
DCAF1  
DCAF10  
DCAF11  
DCAF12  
DCAF13  
DCAF15  
DCAF16  
DCAF17  
DCAF4  
DCAF4L1  
DCAF5  
DCAF6  
DCAF7  
DCAF8  
DCAKD  
DCBLD1  
DCBLD2  
DCC  
DCDC1  
DCDC2  
DCDC2B  
DCHS2  
DCK  
DCLK1  
DCLK3  
DCLRE1A  
DCLRE1B

DCLRE1C  
DCN  
DCP1A  
DCP1B  
DCP2  
DCPS  
DCST1  
DCST2  
DCTD  
DCTN1  
DCTN2  
DCTN3  
DCTN4  
DCTN5  
DCTN6  
DCTPP1  
DCUN1D1  
DCUN1D2  
DCUN1D3  
DCUN1D4  
DCUN1D5  
DCX  
DCXR  
DDA1  
DDAH1  
DDAH2  
DDB1  
DDB2  
DDHD1  
DDHD2  
DDI2  
DDIAS  
DDIT3  
DDIT4  
DDIT4L  
DDO  
DDOST  
DDR1  
DDR2  
DDRGK1  
DDT  
DDTL  
DDX1  
DDX10  
DDX10P1  
DDX11  
DDX17  
DDX18  
DDX18P1  
DDX18P5  
DDX19A  
DDX19B  
DDX20  
DDX21  
DDX23  
DDX24  
DDX25  
DDX27

DDX28  
DDX31  
DDX39A  
DDX39B  
DDX3P1  
DDX3X  
DDX3Y  
DDX41  
DDX42  
DDX43  
DDX46  
DDX47  
DDX49  
DDX5  
DDX50  
DDX50P1  
DDX51  
DDX52  
DDX54  
DDX55  
DDX56  
DDX58  
DDX59  
DDX6  
DDX60  
DDX60L  
DEAF1  
DECR1  
DECR2  
DEDD  
DEDD2  
DEF6  
DEF8  
DEGS1  
DEGS2  
DEK  
DELE1  
DELEC1  
DENND10  
DENND10P1  
DENND11  
DENND1A  
DENND1B  
DENND1C  
DENND2A  
DENND2B  
DENND2C  
DENND2D  
DENND3  
DENND4A  
DENND4B  
DENND4C  
DENND5A  
DENND5B  
DENND6A  
DENND6B  
DENR  
DEPDC1

DEPDC1B  
DEPDC4  
DEPDC5  
DEPP1  
DEPTOR  
DERA  
DERL1  
DERL2  
DERL3  
DESI1  
DESI2  
DET1  
DEUP1  
DEXI  
DFFA  
DFFB  
DGAT1  
DGAT2  
DGCR2  
DGCR5  
DGCR6  
DGCR6L  
DGCR8  
DGKA  
DGKB  
DGKD  
DGKE  
DGKG  
DGKH  
DGKI  
DGKQ  
DGKZ  
DGKZP1  
DGLUCY  
DGUOK  
DHCR24  
DHCR7  
DHDDS  
DHFR  
DHFR2  
DHODH  
DHPS  
DHRS1  
DHRS11  
DHRS12  
DHRS13  
DHRS2  
DHRS3  
DHRS4  
DHRS4L2  
DHRS7  
DHRS7B  
DHRS9  
DHRSX  
DHTKD1  
DHX15  
DHX16  
DHX29

DHX30  
DHX32  
DHX33  
DHX34  
DHX35  
DHX36  
DHX37  
DHX38  
DHX40  
DHX57  
DHX58  
DHX8  
DHX9  
DIABLO  
DIAPH1  
DIAPH2  
DIAPH3  
DICER1  
DIDO1  
DIMG1  
DIO1  
DIO2  
DIP2A  
DIP2B  
DIP2C  
DIPK1A  
DIPK2A  
DIPK2B  
DIRC1  
DIS3  
DIS3L  
DIS3L2  
DISC1  
DISP1  
DISP2  
DIXDC1  
DKC1  
DKK1  
DKK3  
DLAT  
DLC1  
DLD  
DLEC1  
DLEU7  
DLG1  
DLG2  
DLG3  
DLG5  
DLGAP1  
DLGAP2  
DLGAP3  
DLGAP4  
DLGAP5  
DLK2  
DLL1  
DLST  
DMAC1  
DMAC2

DMAC2L  
DMAP1  
DMBT1  
DMC1  
DMD  
DMGDH  
DMKN  
DMPK  
DMRT2  
DMRT3  
DMRTA1  
DMRTA2  
DMTF1  
DMTN  
DMWD  
DMXL1  
DMXL2  
DNA2  
DNAAF1  
DNAAF2  
DNAAF3  
DNAAF4  
DNAAF5  
DNAH1  
DNAH10  
DNAH11  
DNAH12  
DNAH14  
DNAH17  
DNAH2  
DNAH3  
DNAH5  
DNAH6  
DNAH7  
DNAH8  
DNAH9  
DNAI1  
DNAI2  
DNAJA1  
DNAJA2  
DNAJA3  
DNAJA4  
DNAJB1  
DNAJB11  
DNAJB12  
DNAJB13  
DNAJB14  
DNAJB2  
DNAJB4  
DNAJB5  
DNAJB6  
DNAJB7  
DNAJB9  
DNAJC1  
DNAJC10  
DNAJC11  
DNAJC13  
DNAJC14

DNAJC15  
DNAJC16  
DNAJC17  
DNAJC18  
DNAJC19  
DNAJC2  
DNAJC21  
DNAJC22  
DNAJC24  
DNAJC25  
DNAJC25-GNG10  
DNAJC27  
DNAJC28  
DNAJC3  
DNAJC30  
DNAJC4  
DNAJC5  
DNAJC5B  
DNAJC6  
DNAJC7  
DNAJC8  
DNAJC9  
DNAL1  
DNAL4  
DNALI1  
DNASE1  
DNASE1L1  
DNASE1L3  
DNASE2  
DND1  
DNER  
DNHD1  
DNM1  
DNM1L  
DNM1P46  
DNM1P47  
DNM1P51  
DNM2  
DNM3  
DNMBP  
DNMT1  
DNMT3A  
DNMT3B  
DNPEP  
DNPH1  
DNTTIP1  
DNTTIP2  
DOC2A  
DOC2B  
DOCK1  
DOCK10  
DOCK11  
DOCK2  
DOCK3  
DOCK4  
DOCK5  
DOCK6  
DOCK7



DOCK8  
DOCK8-AS1  
DOCK9  
DOHH  
DOK1  
DOK2  
DOK3  
DOK4  
DOK6  
DOLK  
DOLPP1  
DONSON  
DOP1A  
DOP1B  
DOT1L  
DPAGT1  
DPCD  
DPEP2  
DPF1  
DPF2  
DPF3  
DPH1  
DPH2  
DPH3  
DPH5  
DPH6  
DPH7  
DPM1  
DPM2  
DPM3  
DPP10  
DPP3  
DPP4  
DPP7  
DPP8  
DPP9  
DPPA4  
DPY19L1  
DPY19L1P1  
DPY19L1P2  
DPY19L2  
DPY19L2P1  
DPY19L2P2  
DPY19L2P3  
DPY19L2P4  
DPY19L3  
DPY19L4  
DPY30  
DPYD  
DPYS  
DPYSL2  
DPYSL3  
DPYSL5  
DR1  
DRAM1  
DRAM2  
DRAP1  
DRAXIN

DRC1  
DRC3  
DRC7  
DRD2  
DRG1  
DRG1P1  
DRG2  
DROSHA  
DSC2  
DSC3  
DSCAML1  
DSE  
DSEL  
DSG2  
DSG3  
DSN1  
DSP  
DST  
DSTN  
DSTNP2  
DSTYK  
DTD1  
DTD2  
DTHD1  
DTL  
DTNA  
DTNB  
DTNBP1  
DTWD1  
DTWD2  
DTX1  
DTX2  
DTX2P1  
DTX3  
DTX3L  
DTX4  
DTYMK  
DUOX1  
DUOX2  
DUOXA1  
DUOXA2  
DUS1L  
DUS2  
DUS3L  
DUS4L  
DUSP1  
DUSP10  
DUSP11  
DUSP12  
DUSP14  
DUSP16  
DUSP18  
DUSP19  
DUSP2  
DUSP22  
DUSP23  
DUSP28  
DUSP3

DUSP4  
DUSP5  
DUSP6  
DUSP7  
DUSP8  
DUT  
DUX4  
DUX4L19  
DUX4L26  
DUXAP9  
DVL1  
DVL2  
DVL3  
DXO  
DYDC1  
DYDC2  
DYM  
DYNAP  
DYNC1H1  
DYNC1I1  
DYNC1I2  
DYNC1LI1  
DYNC1LI2  
DYNC2H1  
DYNC2LI1  
DYNLL1  
DYNLL2  
DYNLRB1  
DYNLRB2  
DYNLT1  
DYNLT3  
DYRK1A  
DYRK1B  
DYRK2  
DYRK3  
DYRK4  
DYSF  
DZANK1  
DZIP1  
DZIP1L  
DZIP3  
E2F2  
E2F3  
E2F3P2  
E2F4  
E2F5  
E2F6  
E2F7  
E2F8  
E4F1  
EAF1  
EAF2  
EAPP  
EARS2  
EBAG9  
EBF1  
EBF2  
EBF4

EBLN2  
EBNA1BP2  
EBP  
EBPL  
ECD  
ECE1  
ECE2  
ECH1  
ECHDC1  
ECHDC2  
ECHDC3  
ECHS1  
ECI1  
ECI2  
ECM1  
ECM2  
ECPAS  
ECRG4  
ECSIT  
ECT2  
ECT2L  
EDA  
EDAR  
EDARADD  
EDC3  
EDC4  
EDEM1  
EDEM2  
EDEM3  
EDF1  
EDIL3  
EDN1  
EDRF1  
EEA1  
EED  
EEF1A1  
EEF1A1P3  
EEF1A1P33  
EEF1A1P38  
EEF1A1P4  
EEF1A1P5  
EEF1A1P6  
EEF1AKMT1  
EEF1AKMT2  
EEF1AKMT3  
EEF1AKNMT  
EEF1B2  
EEF1D  
EEF1DP3  
EEF1E1  
EEF1G  
EEF2  
EEF2K  
EEF2KMT  
EEFSEC  
EEPD1  
EFCAB1  
EFCAB10

EFCAB11  
EFCAB12  
EFCAB13  
EFCAB14  
EFCAB2  
EFCAB3  
EFCAB5  
EFCAB6  
EFCAB7  
EFCC1  
EFEMP1  
EFEMP2  
EFHB  
EFHC1  
EFHC2  
EFHD1  
EFHD2  
EFL1  
EFL1P1  
EFNA1  
EFNA4  
EFNA5  
EFNB1  
EFNB2  
EFNB3  
EFR3A  
EFR3B  
EFS  
EFTUD2  
EGF  
EGFL6  
EGFL8  
EGFR  
EGLN1  
EGLN2  
EGLN3  
EGR1  
EGR2  
EGR3  
EHBP1  
EHBP1L1  
EHD1  
EHD2  
EHD3  
EHD4  
EHF  
EHHADH  
EHMT1  
EHMT2  
EI24  
EID1  
EID2  
EID2B  
EID3  
EIF1  
EIF1AD  
EIF1AX  
EIF1AY

EIF1B  
EIF2A  
EIF2AK1  
EIF2AK2  
EIF2AK3  
EIF2AK4  
EIF2B1  
EIF2B2  
EIF2B3  
EIF2B4  
EIF2B5  
EIF2D  
EIF2S1  
EIF2S2  
EIF2S2P4  
EIF2S3  
EIF2S3B  
EIF3A  
EIF3B  
EIF3C  
EIF3CL  
EIF3D  
EIF3E  
EIF3F  
EIF3FP3  
EIF3G  
EIF3H  
EIF3I  
EIF3J  
EIF3K  
EIF3L  
EIF3M  
EIF4A1  
EIF4A2  
EIF4A3  
EIF4B  
EIF4E  
EIF4E2  
EIF4E3  
EIF4EBP1  
EIF4EBP2  
EIF4EBP3  
EIF4ENIF1  
EIF4EP1  
EIF4EP2  
EIF4G1  
EIF4G2  
EIF4G3  
EIF4H  
EIF5  
EIF5A  
EIF5A2  
EIF5AL1  
EIF5B  
EIF6  
EIPR1  
ELAC1  
ELAC2

ELAVL1  
ELF1  
ELF2  
ELF3  
ELF4  
ELF5  
ELFN1  
ELK1  
ELK3  
ELK4  
ELL  
ELL2  
ELL3  
ELMO1  
ELMO2  
ELMO3  
ELMOD1  
ELMOD2  
ELMOD3  
ELN  
ELOA  
ELOA3D  
ELOB  
ELOC  
ELOF1  
ELOVL1  
ELOVL5  
ELOVL6  
ELOVL7  
ELP1  
ELP2  
ELP3  
ELP4  
ELP5  
ELP6  
EMB  
EMBP1  
EMC1  
EMC10  
EMC2  
EMC3  
EMC3-AS1  
EMC4  
EMC6  
EMC7  
EMC8  
EMC9  
EMCN  
EMD  
EME1  
EME2  
EMG1  
EMILIN2  
EML1  
EML2  
EML3  
EML4  
EML5

EML6  
EMP1  
EMP2  
EMP3  
EMSY  
EMX2  
ENAH  
ENAM  
ENC1  
ENDOD1  
ENDOG  
ENDOV  
ENG  
ENGASE  
ENKD1  
ENKUR  
ENO1  
ENO1P1  
ENO1P4  
ENO2  
ENO3  
ENO4  
ENOPH1  
ENOSF1  
ENOX1  
ENOX2  
ENPP2  
ENPP3  
ENPP4  
ENPP5  
ENPP6  
ENSA  
ENTPD1  
ENTPD3  
ENTPD4  
ENTPD5  
ENTPD6  
ENTPD7  
ENTR1  
ENY2  
EOGT  
EOLA1  
EOLA2  
EOMES  
EP300  
EP400  
EP400P1  
EPAS1  
EPB41  
EPB41L1  
EPB41L2  
EPB41L3  
EPB41L4A  
EPB41L4B  
EPB41L5  
EPC1  
EPC2  
EPCAM



EPDR1  
EPG5  
EPHA1  
EPHA10  
EPHA2  
EPHA4  
EPHB1  
EPHB2  
EPHB3  
EPHB4  
EPHB6  
EPHX1  
EPHX2  
EPHX3  
EPM2AIP1  
EPN1  
EPN2  
EPN3  
EPOR  
EPPIN  
EPPIN-WFDC6  
EPPK1  
EPRS1  
EPS15  
EPS15L1  
EPS15P1  
EPS8  
EPS8L1  
EPS8L2  
EPS8L3  
EPSTI1  
ERAL1  
ERAP1  
ERAP2  
ERBB2  
ERBB3  
ERBB4  
ERBIN  
ERC1  
ERC2  
ERCC1  
ERCC2  
ERCC3  
ERCC4  
ERCC5  
ERCC6  
ERCC6L  
ERCC6L2  
ERCC8  
EREG  
ERF  
ERG28  
ERGIC1  
ERGIC2  
ERGIC3  
ERH  
ERI1  
ERI2

ERI3  
ERICH1  
ERICH2  
ERICH3  
ERICH5  
ERLEC1  
ERLIN1  
ERLIN2  
ERMAP  
ERMARD  
ERMN  
ERMP1  
ERN1  
ERN2  
ERO1A  
ERO1B  
ERP27  
ERP29  
ERP44  
ERRFI1  
ERV3-1  
ERVFRD-1  
ERVK3-1  
ERVW-1  
ESCO1  
ESCO2  
ESD  
ESF1  
ESPL1  
ESPN  
ESPNP  
ESR1  
ESR2  
ESRP1  
ESRP2  
ESRRA  
ESRRG  
ESS2  
ESYT1  
ESYT2  
ESYT3  
ETAA1  
ETF1  
ETF1P2  
ETFA  
ETFB  
ETFBKMT  
ETFDH  
ETFRF1  
ETHE1  
ETNK1  
ETNK2  
ETS1  
ETS2  
ETV1  
ETV3  
ETV4  
ETV5

ETV6  
ETV7  
EVA1B  
EVA1C  
EVC  
EVC2  
EVI2A  
EVI2B  
EVI5  
EVI5L  
EVL  
EVPL  
EWSR1  
EXD2  
EXD3  
EXO1  
EXO5  
EXOC1  
EXOC2  
EXOC3  
EXOC3L4  
EXOC4  
EXOC5  
EXOC6  
EXOC6B  
EXOC7  
EXOC8  
EXOG  
EXOSC1  
EXOSC10  
EXOSC2  
EXOSC3  
EXOSC4  
EXOSC5  
EXOSC6  
EXOSC7  
EXOSC8  
EXOSC9  
EXPH5  
EXT1  
EXT2  
EXTL2  
EXTL3  
EYA1  
EYA2  
EYA3  
EYA4  
EYS  
EZH1  
EZH2  
EZR  
F11R  
F13A1  
F2R  
F2RL1  
F2RL2  
F2RL3  
F3

F5  
F8  
F8A1  
F8A3  
FA2H  
FAAH  
FAAH2  
FAAP100  
FAAP20  
FAAP24  
FABP2  
FABP5  
FABP5P7  
FABP6  
FABP7  
FADD  
FADS1  
FADS2  
FADS3  
FADS6  
FAF1  
FAF2  
FAH  
FAHD1  
FAHD2A  
FAHD2B  
FAHD2CP  
FAIM  
FAM102A  
FAM102B  
FAM104A  
FAM104B  
FAM107A  
FAM107B  
FAM110A  
FAM110B  
FAM110C  
FAM110D  
FAM111A  
FAM111B  
FAM114A1  
FAM114A2  
FAM117A  
FAM117B  
FAM118A  
FAM118B  
FAM120A  
FAM120AOS  
FAM120B  
FAM120C  
FAM122A  
FAM122B  
FAM122C  
FAM124A  
FAM124B  
FAM126A  
FAM126B  
FAM131A

FAM133B  
FAM135A  
FAM135B  
FAM136A  
FAM13A  
FAM13B  
FAM13C  
FAM149A  
FAM149B1  
FAM151B  
FAM153A  
FAM153B  
FAM153CP  
FAM155A  
FAM156A  
FAM156B  
FAM157A  
FAM157B  
FAM160A1  
FAM160A2  
FAM160B1  
FAM160B2  
FAM161A  
FAM161B  
FAM162A  
FAM163A  
FAM166A  
FAM166B  
FAM166C  
FAM167A  
FAM168A  
FAM168B  
FAM169A  
FAM169B  
FAM171A1  
FAM171B  
FAM172A  
FAM174A  
FAM174B  
FAM174C  
FAM177A1  
FAM177B  
FAM178B  
FAM180B  
FAM181A  
FAM181B  
FAM183A  
FAM184A  
FAM184B  
FAM185A  
FAM186A  
FAM186B  
FAM187A  
FAM189A2  
FAM189B  
FAM193A  
FAM193B  
FAM199X

FAM200A  
FAM200B  
FAM204A  
FAM207A  
FAM209A  
FAM20A  
FAM20B  
FAM20C  
FAM210A  
FAM210B  
FAM214A  
FAM214B  
FAM216A  
FAM216B  
FAM217B  
FAM219A  
FAM219B  
FAM220A  
FAM221A  
FAM221B  
FAM222A  
FAM222B  
FAM227A  
FAM227B  
FAM228B  
FAM229A  
FAM229B  
FAM234A  
FAM234B  
FAM237B  
FAM241A  
FAM32A  
FAM3A  
FAM3B  
FAM3C  
FAM3C2  
FAM3D  
FAM43A  
FAM47E  
FAM47E-STBD1  
FAM50A  
FAM50B  
FAM53B  
FAM53C  
FAM71A  
FAM72A  
FAM74A4  
FAM74A6  
FAM76A  
FAM76B  
FAM78A  
FAM78B  
FAM81A  
FAM81B  
FAM83A  
FAM83B  
FAM83C  
FAM83D

FAM83E  
FAM83F  
FAM83G  
FAM83H  
FAM86B1  
FAM86B3P  
FAM86C1  
FAM86C2P  
FAM86DP  
FAM86EP  
FAM86JP  
FAM89B  
FAM8A1  
FAM8A4P  
FAM90A24P  
FAM91A1  
FAM92A  
FAM92B  
FAM95C  
FAM98A  
FAM98B  
FAM98C  
FAM9B  
FAM9C  
FAN1  
FANCA  
FANCC  
FANCD2  
FANCE  
FANCF  
FANCG  
FANCI  
FANCL  
FANCM  
FANK1  
FAP  
FAR1  
FAR2  
FAR2P1  
FAR2P2  
FARP1  
FARP2  
FARS2  
FARSA  
FARSB  
FAS  
FASLG  
FASN  
FASTK  
FASTKD1  
FASTKD2  
FASTKD3  
FASTKD5  
FAT1  
FAT2  
FAT3  
FAT4  
FAU

FAXC  
FAXDC2  
FBF1  
FBH1  
FBL  
FBLIM1  
FBLN1  
FBLN5  
FBLN7  
FBN1  
FBN2  
FBP1  
FBR5  
FBRSL1  
FBXL12  
FBXL13  
FBXL14  
FBXL15  
FBXL16  
FBXL17  
FBXL18  
FBXL19  
FBXL2  
FBXL20  
FBXL22  
FBXL3  
FBXL4  
FBXL5  
FBXL6  
FBXL7  
FBXL8  
FBXO10  
FBXO11  
FBXO15  
FBXO16  
FBXO17  
FBXO2  
FBXO21  
FBXO22  
FBXO24  
FBXO25  
FBXO27  
FBXO28  
FBXO3  
FBXO30  
FBXO31  
FBXO32  
FBXO33  
FBXO34  
FBXO36  
FBXO38  
FBXO39  
FBXO4  
FBXO40  
FBXO41  
FBXO42  
FBXO43  
FBXO44



FBXO45  
FBXO46  
FBXO48  
FBXO5  
FBXO6  
FBXO7  
FBXO8  
FBXO9  
FBXW10  
FBXW11  
FBXW12  
FBXW2  
FBXW4  
FBXW4P1  
FBXW5  
FBXW7  
FBXW8  
FBXW9  
FCAR  
FCER1A  
FCER1G  
FCER2  
FCF1  
FCGBP  
FCGR1A  
FCGR1B  
FCGR1CP  
FCGR2A  
FCGR2B  
FCGR2C  
FCGR3A  
FCGR3B  
FCGRT  
FCHO1  
FCHO2  
FCHSD1  
FCHSD2  
FCMR  
FCN1  
FCRL1  
FCRL2  
FCRL3  
FCRL4  
FCRL5  
FCRL6  
FCRLA  
FCSK  
FDFT1  
FDPS  
FDPSP2  
FDPSP3  
FDPSP7  
FDX1  
FDX2  
FDXACB1  
FDXR  
FECH  
FEM1A

FEM1B  
FEM1C  
FEN1  
FER  
FER1L4  
FER1L5  
FER1L6  
FERMT1  
FERMT2  
FERMT3  
FES  
FEZ1  
FEZ2  
FEZF1  
FFAR1  
FFAR2  
FFAR4  
FGD1  
FGD2  
FGD3  
FGD4  
FGD5  
FGD6  
FGF1  
FGF11  
FGF12  
FGF13  
FGF14  
FGF23  
FGF5  
FGF7  
FGF7P6  
FGF9  
FGFBP1  
FGFBP3  
FGFR1  
FGFR1OP  
FGFR1OP2  
FGFR2  
FGFR3  
FGFRL1  
FGGY  
FGL2  
FGR  
FH  
FHAD1  
FHDC1  
FHIT  
FHL1  
FHL2  
FHL3  
FHOD1  
FHOD3  
FIBP  
FICD  
FIG4  
FIGN  
FIGNL1

FILIP1  
FILIP1L  
FIP1L1  
FIS1  
FITM2  
FIZ1  
FKBP11  
FKBP14  
FKBP15  
FKBP1A  
FKBP1B  
FKBP2  
FKBP3  
FKBP4  
FKBP5  
FKBP6  
FKBP7  
FKBP8  
FKBP9  
FKBP9P1  
FKBPL  
FKRP  
FKTN  
FLACC1  
FLAD1  
FLCN  
FLG  
FLG2  
FLI1  
FLII  
FLNA  
FLNB  
FLNC  
FLOT1  
FLOT2  
FLRT2  
FLRT3  
FLT1  
FLT1P1  
FLT3LG  
FLT4  
FLVCR1  
FLVCR2  
FLYWCH1  
FLYWCH2  
FMC1  
FMC1-LUC7L2  
FMN1  
FMN2  
FMNL1  
FMNL2  
FMNL3  
FMO2  
FMO3  
FMO4  
FMO5  
FMO6P  
FMR1

FN1  
FN3K  
FN3KRP  
FNBP1  
FNBP1L  
FNBP1P1  
FNBP4  
FNDC10  
FNDC11  
FNDC3A  
FNDC3B  
FNDC9  
FNIP1  
FNIP2  
FNTA  
FNTB  
FO681492.1  
FOCAD  
FOLH1  
FOLR1  
FOLR3  
FOPNL  
FOS  
FOSB  
FOSL1  
FOSL2  
FOXA1  
FOXA3  
FOXC1  
FOXD4L5  
FOX E1  
FOXG1  
FOX I1  
FOX I2  
FOXJ1  
FOXJ2  
FOXJ3  
FOXK1  
FOXK2  
FOXL2NB  
FOXM1  
FOXN2  
FOXN3  
FOXN4  
FOXO1  
FOXO3  
FOXO3B  
FOXO4  
FOXP1  
FOXP2  
FOXP3  
FOXP4  
FOXQ1  
FOXRED1  
FOXRED2  
FP565260.1  
FP565260.3  
FP565260.6

FPGS  
FPGT  
FPGT-TNNI3K  
FPR1  
FPR2  
FPR3  
FRA10AC1  
FRAS1  
FRAT1  
FRAT2  
FREM1  
FREM2  
FRG1  
FRG1BP  
FRG1HP  
FRK  
FRMD3  
FRMD4A  
FRMD4B  
FRMD5  
FRMD6  
FRMD8  
FRMPD1  
FRMPD2  
FRMPD2B  
FRMPD3  
FRRS1  
FRRS1L  
FRS2  
FRS3  
FRY  
FRYL  
FSBP  
FSCN1  
FSD1L  
FSD2  
FSIP1  
FSIP2  
FSTL1  
FSTL4  
FSTL5  
FTH1  
FTL  
FTO  
FTSJ1  
FTSJ3  
FUBP1  
FUBP3  
FUCA1  
FUCA2  
FUNDC1  
FUNDC2  
FURIN  
FUS  
FUT1  
FUT10  
FUT11  
FUT2

FUT3  
FUT4  
FUT6  
FUT8  
FUT9  
FUZ  
FXN  
FXR1  
FXR2  
FXYD1  
FXYD3  
FXYD5  
FXYD6  
FYB1  
FYB2  
FYCO1  
FYN  
FYTTD1  
FZD1  
FZD3  
FZD4  
FZD5  
FZD6  
FZD8  
FZR1  
G0S2  
G2E3  
G3BP1  
G3BP2  
G6PC  
G6PC3  
G6PD  
GAA  
GAB1  
GAB2  
GAB3  
GABARAP  
GABARAPL1  
GABARAPL2  
GABBR1  
GABPA  
GABPAP  
GABPB1  
GABPB2  
GABRA1  
GABRA2  
GABRA4  
GABRB2  
GABRB3  
GABRE  
GABRG3  
GABRP  
GAD1  
GADD45A  
GADD45B  
GADD45G  
GADD45GIP1  
GADL1

GAK  
GAL3ST2  
GAL3ST4  
GALC  
GALE  
GALK1  
GALK2  
GALM  
GALNS  
GALNT1  
GALNT10  
GALNT11  
GALNT12  
GALNT13  
GALNT14  
GALNT15  
GALNT16  
GALNT17  
GALNT18  
GALNT2  
GALNT3  
GALNT4  
GALNT5  
GALNT6  
GALNT7  
GALR1  
GALT  
GAMT  
GAN  
GANAB  
GANC  
GAPDH  
GAPDHP24  
GAPT  
GAPVD1  
GAR1  
GAREM1  
GAREM2  
GARNL3  
GARS1  
GART  
GAS1  
GAS2  
GAS2L1  
GAS2L2  
GAS2L3  
GAS6  
GAS7  
GAS8  
GASK1B  
GATA3  
GATA6  
GATAD1  
GATAD2A  
GATAD2B  
GATB  
GATC  
GATD1

GATD3A  
GATD3B  
GATM  
GBA  
GBA2  
GBAP1  
GBE1  
GBF1  
GBGT1  
GBP1  
GBP1P1  
GBP2  
GBP3  
GBP4  
GBP5  
GBP6  
GCA  
GCAT  
GCC1  
GCC2  
GCDH  
GCFC2  
GCH1  
GCHFR  
GCLC  
GCLM  
GCM1  
GCN1  
GCNA  
GCNT1  
GCNT1P1  
GCNT2  
GCNT3  
GCNT4  
GCNT7  
GCOM1  
GCSAM  
GCSAML  
GCSH  
GDA  
GDAP1  
GDAP2  
GDE1  
GDF11  
GDF15  
GDF6  
GDF7  
GDF9  
GDI1  
GDI2  
GDNF  
GDPD1  
GDPD3  
GDPD5  
GDPGP1  
GEM  
GEMIN2  
GEMIN4



GEMIN5  
GEMIN6  
GEMIN7  
GEMIN8  
GEN1  
GET1  
GET3  
GET4  
GFAP  
GFER  
GFI1  
GFI1B  
GFM1  
GFM2  
GFOD1  
GFOD2  
GFPT1  
GFRA1  
GGA1  
GGA2  
GGA3  
GGACT  
GGCT  
GGCX  
GGH  
GGNBP1  
GGNBP2  
GGPS1  
GGT1  
GGT5  
GGT6  
GGT7  
GGTA1P  
GHDC  
GHITM  
GHR  
GID4  
GID8  
GIGYF1  
GIGYF2  
GIMAP1  
GIMAP1-GIMAP5  
GIMAP2  
GIMAP4  
GIMAP5  
GIMAP6  
GIMAP7  
GIMAP8  
GIN1  
GINM1  
GINS1  
GINS2  
GINS3  
GINS4  
GIPC1  
GIPC2  
GIPR  
GIT1

GIT2  
GJA9  
GJB2  
GJB3  
GJB4  
GJB5  
GJB7  
GJC1  
GK  
GK3P  
GK5  
GKAP1  
GLA  
GLB1  
GLB1L  
GLB1L2  
GLB1L3  
GLCCI1  
GLCE  
GLDN  
GLE1  
GLG1  
GLI1  
GLI2  
GLI3  
GLI4  
GLIPR1  
GLIPR1L2  
GLIPR2  
GLIS2  
GLIS3  
GLMN  
GLMP  
GLO1  
GLOD4  
GLRA3  
GLRX  
GLRX3  
GLRX5  
GLS  
GLS2  
GLT1D1  
GLT8D1  
GLTP  
GLUD1  
GLUL  
GLYATL2  
GLYCTK  
GLYR1  
GM2A  
GMCL1  
GMDS  
GMEB1  
GMEB2  
GMFB  
GMFG  
GMIP  
GMNC

GMNN  
GMPPA  
GMPPB  
GMPR  
GMPR2  
GMPS  
GNA11  
GNA12  
GNA13  
GNA14  
GNA15  
GNAI1  
GNAI2  
GNAI3  
GNAL  
GNAO1  
GNAQ  
GNAS  
GNAZ  
GNB1  
GNB1L  
GNB2  
GNB4  
GNB5  
GNE  
GNG10  
GNG12  
GNG2  
GNG4  
GNG5  
GNG7  
GNGT1  
GNGT2  
GNL1  
GNL2  
GNL3  
GNL3L  
GNLY  
GNPAT  
GNPDA1  
GNPDA2  
GNPNAT1  
GNPTAB  
GNPTG  
GNRH1  
GNRHR2  
GNS  
GOLGA1  
GOLGA2  
GOLGA2P10  
GOLGA2P11  
GOLGA2P5  
GOLGA2P7  
GOLGA3  
GOLGA4  
GOLGA5  
GOLGA6A  
GOLGA6D

GOLGA6L10  
GOLGA6L17P  
GOLGA6L22  
GOLGA6L4  
GOLGA6L5P  
GOLGA6L9  
GOLGA7  
GOLGA7B  
GOLGA8A  
GOLGA8B  
GOLGA8J  
GOLGA8N  
GOLGA8Q  
GOLGA8R  
GOLGB1  
GOLIM4  
GOLM1  
GOLPH3  
GOLPH3L  
GOLT1B  
GON4L  
GON7  
GOPC  
GORAB  
GORASP1  
GORASP2  
GOSR1  
GOSR2  
GOT1  
GOT2  
GP2  
GP5  
GP6  
GPAA1  
GPALPP1  
GPAM  
GPANK1  
GPAT2  
GPAT3  
GPAT4  
GPATCH1  
GPATCH11  
GPATCH2  
GPATCH2L  
GPATCH3  
GPATCH4  
GPATCH8  
GPBAR1  
GPBP1  
GPBP1L1  
GPC1  
GPC2  
GPC4  
GPCPD1  
GPD1L  
GPD2  
GPHN  
GPI

GPKOW  
GPLD1  
GPM6A  
GPM6B  
GPN1  
GPN2  
GPN3  
GPNMB  
GPR107  
GPR108  
GPR132  
GPR135  
GPR137  
GPR137B  
GPR137C  
GPR141  
GPR153  
GPR155  
GPR156  
GPR157  
GPR160  
GPR161  
GPR162  
GPR171  
GPR173  
GPR18  
GPR180  
GPR183  
GPR27  
GPR34  
GPR35  
GPR37L1  
GPR4  
GPR61  
GPR63  
GPR65  
GPR68  
GPR75  
GPR82  
GPR83  
GPR84  
GPR85  
GPR87  
GPR89A  
GPR89B  
GPRASP1  
GPRASP2  
GPRC5A  
GPRC5B  
GPRC5C  
GPRC5D  
GPRIN3  
GPS1  
GPS2  
GPSM2  
GPSM3  
GPT2  
GPX1

GPX2  
GPX3  
GPX4  
GPX6  
GPX7  
GPX8  
GRAMD1A  
GRAMD1B  
GRAMD1C  
GRAMD2A  
GRAMD2B  
GRAMD4  
GRAMD4P3  
GRAMD4P7  
GRAP  
GRAP2  
GRASP  
GRB10  
GRB2  
GRB7  
GREB1  
GREB1L  
GREM1  
GRHL1  
GRHL2  
GRHL3  
GRHPR  
GRIA1  
GRIA4  
GRIK2  
GRIN2A  
GRIN2B  
GRIN2C  
GRIN3A  
GRIN3B  
GRINA  
GRIP1  
GRIP2  
GRIPAP1  
GRK2  
GRK3  
GRK4  
GRK5  
GRK6  
GRM2  
GRM4  
GRM5  
GRM7  
GRN  
GRPEL1  
GRPEL2  
GRSF1  
GRTP1  
GRWD1  
GSAP  
GSDMA  
GSDMB  
GSDMC

GSDMD  
GSDME  
GSE1  
GSG1  
GSG1L  
GSK3A  
GSK3B  
GSKIP  
GSN  
GSPT1  
GSPT2  
GSR  
GSTA1  
GSTA2  
GSTA3  
GSTA4  
GSTA8P  
GSTCD  
GSTK1  
GSTM1  
GSTM2  
GSTM3  
GSTM4  
GSTO1  
GSTO2  
GSTP1  
GSTT1  
GSTT4  
GSTZ1  
GTDC1  
GTF2A1  
GTF2A2  
GTF2B  
GTF2E1  
GTF2E2  
GTF2F1  
GTF2F2  
GTF2H1  
GTF2H2  
GTF2H2B  
GTF2H2C  
GTF2H2C\_2  
GTF2H3  
GTF2H4  
GTF2H5  
GTF2I  
GTF2IP1  
GTF2IP12  
GTF2IP13  
GTF2IP20  
GTF2IP4  
GTF2IP7  
GTF2IRD1  
GTF2IRD1P1  
GTF2IRD2  
GTF2IRD2B  
GTF2IRD2P1  
GTF3A

GTF3C1  
GTF3C2  
GTF3C3  
GTF3C4  
GTF3C5  
GTF3C6  
GTPBP1  
GTPBP10  
GTPBP2  
GTPBP3  
GTPBP4  
GTPBP6  
GTPBP8  
GTSE1  
GTSF1  
GUCA1B  
GUCD1  
GUCY1A1  
GUCY1A2  
GUCY1B1  
GUCY1B2  
GUCY2C  
GUCY2F  
GUF1  
GUK1  
GULP1  
GUSB  
GUSBP1  
GUSBP2  
GUSBP3  
GUSBP6  
GUSBP9  
GVINP1  
GVQW3  
GXYLT1  
GXYLT2  
GYG1  
GYG2  
GYG2P1  
GYPC  
GYPE  
GYS1  
GZF1  
GZMA  
GZMB  
GZMH  
H1-0  
H1-10  
H1-2  
H1-3  
H1-4  
H1-5  
H2AC11  
H2AC18  
H2AC19  
H2AC20  
H2AC6  
H2AC8



H2AJ  
H2AX  
H2AZ1  
H2AZ2  
H2BC11  
H2BC15  
H2BC18  
H2BC20P  
H2BC21  
H2BC4  
H2BC5  
H2BC6  
H2BC7  
H2BC8  
H2BC9  
H2BU1  
H3-3A  
H3-3B  
H3C10  
H3C12  
H3C14  
H3C15  
H3C6  
H3C8  
H3P37  
H3P6  
H4-16  
H4C14  
H4C15  
H4C2  
H4C3  
H4C5  
H4C8  
H4C9  
H6PD  
HAAO  
HABP4  
HACD1  
HACD2  
HACD3  
HACD4  
HACE1  
HACL1  
HADH  
HADHA  
HADHB  
HAGH  
HAGHL  
HAL  
HAMP  
HAP1  
HAPLN3  
HAPLN4  
HARBI1  
HARS1  
HARS2  
HAS2  
HAS3

HASPIN  
HAT1  
HAUS1  
HAUS2  
HAUS3  
HAUS4  
HAUS5  
HAUS6  
HAUS7  
HAUS8  
HAVCR2  
HAX1  
HBA1  
HBA2  
HBB  
HBEGF  
HBG2  
HBP1  
HBS1L  
HCAR1  
HCAR2  
HCAR3  
HCCS  
HCFC1  
HCFC1R1  
HCFC2  
HCK  
HCLS1  
HCN1  
HCN3  
HCN4  
HDAC1  
HDAC10  
HDAC11  
HDAC1P2  
HDAC2  
HDAC3  
HDAC4  
HDAC5  
HDAC6  
HDAC7  
HDAC8  
HDAC9  
HDC  
HDDC2  
HDDC3  
HDGF  
HDGFL2  
HDGFL3  
HDHD2  
HDHD3  
HDHD5  
HDLBP  
HDX  
HEATR1  
HEATR3  
HEATR4  
HEATR5A

HEATR5B  
HEATR6  
HEATR9  
HEBP1  
HEBP2  
HECA  
HECTD1  
HECTD2  
HECTD3  
HECTD4  
HECW1  
HECW2  
HEG1  
HELB  
HELLS  
HELQ  
HELZ  
HELZ2  
HEMGN  
HEMK1  
HENMT1  
HEPACAM2  
HEPHL1  
HERC1  
HERC2  
HERC2P2  
HERC2P3  
HERC2P4  
HERC2P5  
HERC2P8  
HERC2P9  
HERC3  
HERC4  
HERC5  
HERC6  
HERPUD1  
HERPUD2  
HES1  
HES2  
HES4  
HES6  
HESX1  
HEXA  
HEXB  
HEXD  
HEXIM1  
HEXIM2  
HEY1  
HEY2  
HFE  
HGD  
HGF  
HGH1  
HGS  
HGSNAT  
HHAT  
HHATL  
HHEX

HHIP  
HHIPL1  
HHLA1  
HHLA2  
HHLA3  
HIBADH  
HIBCH  
HIC1  
HIC2  
HID1  
HIF1A  
HIF1AN  
HIF3A  
HIGD1A  
HIGD2A  
HIKESHI  
HILPDA  
HINFP  
HINT1  
HINT2  
HINT3  
HIP1  
HIP1R  
HIPK1  
HIPK2  
HIPK3  
HIRA  
HIRIP3  
HIVEP1  
HIVEP2  
HIVEP3  
HJURP  
HK1  
HK2  
HK3  
HLA-A  
HLA-B  
HLA-C  
HLA-DMA  
HLA-DMB  
HLA-DOA  
HLA-DOB  
HLA-DPA1  
HLA-DPB1  
HLA-DPB2  
HLA-DQA1  
HLA-DQA2  
HLA-DQB1  
HLA-DQB2  
HLA-DRA  
HLA-DRB1  
HLA-DRB3  
HLA-DRB4  
HLA-DRB5  
HLA-E  
HLA-F  
HLA-H  
HLA-J

HLA-L  
HLA-V  
HLCS  
HLF  
HLTF  
HLX  
HM13  
HMBOX1  
HMBS  
HMCES  
HMCN1  
HMCN2  
HMG20A  
HMG20B  
HMGA1  
HMGA2  
HMGB1  
HMGB1P3  
HMGB1P39  
HMGB1P5  
HMGB1P6  
HMGB1P8  
HMGB2  
HMGB3  
HMGB3P9  
HMGCL  
HMGCR  
HMGCS1  
HMGCS2  
HMGN1  
HMGN2  
HMGN2P46  
HMGN3  
HMGN4  
HMGN5  
HMGXB3  
HMGXB4  
HMMR  
HMOX1  
HMOX2  
HNF1B  
HNF4A  
HNF4G  
HNMT  
HNRNPA0  
HNRNPA1  
HNRNPA1L2  
HNRNPA1P40  
HNRNPA1P48  
HNRNPA1P54  
HNRNPA2B1  
HNRNPA3  
HNRNPA3P15  
HNRNPA3P2  
HNRNPA3P6  
HNRNPAB  
HNRNPC  
HNRNPD

HNRNPDL  
HNRNPF  
HNRNPH1  
HNRNPH1P1  
HNRNPH2  
HNRNPH3  
HNRNPK  
HNRNPL  
HNRNPLL  
HNRNPM  
HNRNPR  
HNRNPU  
HNRNPUL1  
HNRNPUL2  
HNRNPUL2-BSCL2  
HOGA1  
HOMER1  
HOMER2  
HOMER3  
HOMEZ  
HOOK1  
HOOK2  
HOOK3  
HOPX  
HORMAD1  
HOXB13  
HOXB3  
HP  
HP1BP3  
HPCAL1  
HPF1  
HPGD  
HPRT1  
HPS1  
HPS3  
HPS4  
HPS5  
HPS6  
HPSE  
HPX  
HR  
HRAS  
HRG  
HRH1  
HRH2  
HRH4  
HRK  
HRNR  
HS1BP3  
HS2ST1  
HS3ST1  
HS3ST2  
HS3ST3B1  
HS3ST6  
HS6ST1  
HSBP1  
HSBP1L1  
HSCB

HSD11B1L  
HSD11B2  
HSD17B1  
HSD17B10  
HSD17B11  
HSD17B12  
HSD17B13  
HSD17B2  
HSD17B4  
HSD17B7  
HSD17B7P2  
HSD17B8  
HSD3B7  
HSDL1  
HSDL2  
HSF1  
HSF2  
HSF4  
HSF5  
HSH2D  
HSP90AA1  
HSP90AB1  
HSP90AB2P  
HSP90AB3P  
HSP90AB4P  
HSP90AB7P  
HSP90B1  
HSPA12A  
HSPA13  
HSPA14  
HSPA1A  
HSPA1B  
HSPA1L  
HSPA2  
HSPA4  
HSPA4L  
HSPA5  
HSPA6  
HSPA7  
HSPA8  
HSPA9  
HSPB1  
HSPB11  
HSPB8  
HSPBAP1  
HSPBP1  
HSPD1  
HSPE1  
HSPE1-MOB4  
HSPG2  
HSPH1  
HTATIP2  
HTATSF1  
HTATSF1P2  
HTD2  
HTN1  
HTN3  
HTR1D

HTR2A  
HTR3B  
HTR7P1  
HTRA1  
HTRA2  
HTRA4  
HTT  
HUNK  
HUS1  
HUWE1  
HVCN1  
HYAL1  
HYAL2  
HYAL4  
HYDIN  
HYDIN2  
HYI  
HYKK  
HYLS1  
HYOU1  
HYPK  
IAH1  
IAPP  
IARS1  
IARS2  
IARS2P1  
IBA57  
IBTK  
ICA1  
ICA1L  
ICAM1  
ICAM2  
ICAM3  
ICAM4  
ICAM5  
ICE1  
ICE2  
ICMT  
ICOS  
ICOSLG  
ID1  
ID2  
ID3  
ID4  
IDE  
IDH1  
IDH2  
IDH3A  
IDH3B  
IDH3G  
IDI1  
IDNK  
IDO1  
IDO2  
IDS  
IDUA  
IER2  
IER3



IER3IP1  
IER5  
IER5L  
IFFO1  
IFFO2  
IFI16  
IFI27  
IFI27L2  
IFI30  
IFI35  
IFI44  
IFI44L  
IFI6  
IFIH1  
IFIT1  
IFIT1B  
IFIT2  
IFIT3  
IFIT5  
IFITM1  
IFITM10  
IFITM2  
IFITM3  
IFNAR1  
IFNAR2  
IFNG  
IFNGR1  
IFNGR2  
IFNLR1  
IFRD1  
IFRD2  
IFT122  
IFT140  
IFT172  
IFT20  
IFT22  
IFT27  
IFT43  
IFT46  
IFT52  
IFT57  
IFT74  
IFT80  
IFT81  
IFT88  
IFTAP  
IGBP1  
IGF1  
IGF1R  
IGF2  
IGF2BP1  
IGF2BP2  
IGF2BP3  
IGF2R  
IGFBP2  
IGFBP3  
IGFBP4  
IGFBP5

IGFBP7  
IGFBPL1  
IGFL2  
IGFL4  
IGFLR1  
IGHA1  
IGHA2  
IGHD  
IGHEP2  
IGHG1  
IGHG2  
IGHG3  
IGHG4  
IGHGP  
IGHM  
IGHMBP2  
IGIP  
IGKC  
IGKV1-33  
IGKV1-39  
IGKV1-5  
IGKV1D-33  
IGKV2-28  
IGKV2D-28  
IGKV3-11  
IGKV3-15  
IGKV3-20  
IGKV4-1  
IGLC1  
IGLC2  
IGLC3  
IGLL5  
IGLON5  
IGLV1-44  
IGLV1-51  
IGLV2-14  
IGLV2-23  
IGLV2-8  
IGLV3-1  
IGLV3-21  
IGSF1  
IGSF10  
IGSF11  
IGSF3  
IGSF5  
IGSF6  
IGSF8  
IGSF9  
IK  
IKBIP  
IKBKB  
IKBKE  
IKBKG  
IKBKGP1  
IKZF1  
IKZF2  
IKZF3  
IKZF4

IKZF5  
IL10RA  
IL10RB  
IL11RA  
IL12A  
IL12B  
IL12RB1  
IL12RB2  
IL13RA1  
IL15  
IL15RA  
IL16  
IL17RA  
IL17RB  
IL17RC  
IL17RD  
IL17RE  
IL17REL  
IL18  
IL18BP  
IL18R1  
IL18RAP  
IL19  
IL1A  
IL1B  
IL1R1  
IL1R2  
IL1RAP  
IL1RL1  
IL1RL2  
IL1RN  
IL20RA  
IL20RB  
IL21R  
IL22RA1  
IL23A  
IL23R  
IL24  
IL27RA  
IL2RA  
IL2RB  
IL2RG  
IL32  
IL33  
IL36G  
IL3RA  
IL4I1  
IL4R  
IL5RA  
IL6  
IL6R  
IL6ST  
IL7  
IL7R  
ILDR1  
ILDR2  
ILF2  
ILF3

ILK  
ILKAP  
ILRUN  
ILVBL  
IMMP1L  
IMMP2L  
IMMT  
IMP3  
IMP4  
IMPA1  
IMPA2  
IMPACT  
IMPAD1  
IMPDH1  
IMPDH1P10  
IMPDH2  
IMPG1  
IMPG2  
INA  
INAVA  
INCA1  
INCENP  
INF2  
ING1  
ING2  
ING3  
ING4  
ING5  
INHBA  
INHBB  
INHBE  
INIP  
INKA2  
INMT  
INMT-MINDY4  
INO80  
INO80B  
INO80B-WBP1  
INO80C  
INO80D  
INO80E  
INPP1  
INPP4A  
INPP4B  
INPP5A  
INPP5B  
INPP5D  
INPP5E  
INPP5F  
INPP5J  
INPP5K  
INPPL1  
INSIG1  
INSIG2  
INSL3  
INSL4  
INSL6  
INSR

INSYN1  
INSYN2A  
INSYN2B  
INTS1  
INTS10  
INTS11  
INTS12  
INTS13  
INTS14  
INTS2  
INTS3  
INTS4  
INTS4P1  
INTS4P2  
INTS5  
INTS6  
INTS6L  
INTS7  
INTS8  
INTS9  
INTU  
INVS  
IP6K1  
IP6K2  
IP6K3  
IPCEF1  
IPMK  
IPO11  
IPO13  
IPO4  
IPO5  
IPO5P1  
IPO7  
IPO7P2  
IPO8  
IPO9  
IPP  
IPPK  
IQANK1  
IQCA1  
IQCB1  
IQCC  
IQCD  
IQCE  
IQCF3  
IQCG  
IQCH  
IQCK  
IQCM  
IQCN  
IQGAP1  
IQGAP2  
IQGAP3  
IQSEC1  
IQSEC2  
IQUB  
IRAK1  
IRAK1BP1

IRAK2  
IRAK3  
IRAK4  
IREB2  
IRF1  
IRF2  
IRF2BP1  
IRF2BP2  
IRF2BPL  
IRF3  
IRF4  
IRF5  
IRF6  
IRF7  
IRF8  
IRF9  
IRGM  
IRGQ  
IRS1  
IRS2  
IRS3P  
IRX3  
IRX5  
ISCA1  
ISCA2  
ISCU  
ISG15  
ISG20  
ISG20L2  
ISL1  
ISLR2  
ISOC1  
ISOC2  
IST1  
ISY1  
ISY1-RAB43  
ISYNA1  
ITCH  
ITFG1  
ITFG2  
ITGA1  
ITGA10  
ITGA11  
ITGA2  
ITGA3  
ITGA4  
ITGA5  
ITGA6  
ITGA7  
ITGA8  
ITGA9  
ITGAD  
ITGAE  
ITGAL  
ITGAM  
ITGAV  
ITGAX  
ITGB1

ITGB1BP1  
ITGB2  
ITGB3BP  
ITGB4  
ITGB5  
ITGB6  
ITGB7  
ITGB8  
ITGBL1  
ITIH4  
ITIH5  
ITIH6  
ITK  
ITM2A  
ITM2B  
ITM2C  
ITPA  
ITPK1  
ITPKB  
ITPKC  
ITPR1  
ITPR2  
ITPR3  
ITPRID1  
ITPRID2  
ITPRIP  
ITPRIPL1  
ITPRIPL2  
ITSN1  
ITSN2  
IVD  
IVL  
IVNS1ABP  
IWS1  
IYD  
IZUMO1  
IZUMO2  
IZUMO4  
JADE1  
JADE2  
JADE3  
JAG1  
JAG2  
JAGN1  
JAK1  
JAK2  
JAK3  
JAKMIP2  
JAKMIP3  
JAM2  
JAM3  
JAML  
JARID2  
JAZF1  
JCAD  
JCHAIN  
JDP2  
JHY

JKAMP  
JMJD1C  
JMJD4  
JMJD6  
JMJD7  
JMJD7-PLA2G4B  
JMJD8  
JMY  
JOSD1  
JOSD2  
JPH1  
JPH3  
JPT1  
JPT2  
JRK  
JRKL  
JSRP1  
JTB  
JUN  
JUNB  
JUND  
JUP  
KALRN  
KANK1  
KANK2  
KANSL1  
KANSL1L  
KANSL2  
KANSL3  
KANTR  
KARS1  
KAT14  
KAT2A  
KAT2B  
KAT5  
KAT6A  
KAT6B  
KAT7  
KAT8  
KATNA1  
KATNAL1  
KATNAL2  
KATNB1  
KATNBL1  
KAZN  
KBTBD11  
KBTBD12  
KBTBD2  
KBTBD3  
KBTBD4  
KBTBD6  
KBTBD7  
KBTBD8  
KCMF1  
KCNA1  
KCNA3  
KCNA7  
KCNAB1



KCNAB2  
KCNAB3  
KCNB1  
KCNC3  
KCNC4  
KCND1  
KCND3  
KCNE1  
KCNE1B  
KCNE3  
KCNE4  
KCNG1  
KCNG4  
KCNH3  
KCNH6  
KCNH7  
KCNIP4  
KCNJ1  
KCNJ13  
KCNJ14  
KCNJ15  
KCNJ16  
KCNJ2  
KCNJ3  
KCNJ5  
KCNJ6  
KCNK1  
KCNK10  
KCNK12  
KCNK2  
KCNK3  
KCNK5  
KCNK6  
KCNMA1  
KCNMB1  
KCNMB2  
KCNMB3  
KCNMB4  
KCNN2  
KCNN3  
KCNN4  
KCNQ1  
KCNQ3  
KCNQ5  
KCNRG  
KCNS1  
KCNS3  
KCNT1  
KCNV1  
KCP  
KCTD1  
KCTD10  
KCTD11  
KCTD12  
KCTD13  
KCTD14  
KCTD15  
KCTD17

KCTD18  
KCTD19  
KCTD2  
KCTD20  
KCTD21  
KCTD3  
KCTD5  
KCTD6  
KCTD7  
KCTD9  
KDELR1  
KDELR2  
KDELR3  
KDF1  
KDM1A  
KDM1B  
KDM2A  
KDM2B  
KDM3A  
KDM3B  
KDM4A  
KDM4B  
KDM4C  
KDM4D  
KDM5A  
KDM5B  
KDM5C  
KDM5D  
KDM6A  
KDM6B  
KDM7A  
KDM8  
KDSR  
KEAP1  
KHDC1  
KHDC4  
KHDRBS1  
KHDRBS3  
KHNYN  
KHSRP  
KIAA0040  
KIAA0100  
KIAA0232  
KIAA0319  
KIAA0319L  
KIAA0355  
KIAA0408  
KIAA0513  
KIAA0556  
KIAA0586  
KIAA0753  
KIAA0825  
KIAA0895  
KIAA0895L  
KIAA0930  
KIAA1109  
KIAA1143  
KIAA1191

KIAA1211L  
KIAA1217  
KIAA1257  
KIAA1324  
KIAA1324L  
KIAA1328  
KIAA1522  
KIAA1549  
KIAA1549L  
KIAA1586  
KIAA1614  
KIAA1671  
KIAA1841  
KIAA1958  
KIAA2012  
KIAA2013  
KIAA2026  
KIDINS220  
KIF11  
KIF13A  
KIF13B  
KIF14  
KIF15  
KIF16B  
KIF17  
KIF18A  
KIF18B  
KIF19  
KIF1B  
KIF1C  
KIF20A  
KIF20B  
KIF21A  
KIF21B  
KIF22  
KIF23  
KIF24  
KIF26B  
KIF27  
KIF28P  
KIF2A  
KIF2C  
KIF3A  
KIF3B  
KIF3C  
KIF4A  
KIF5B  
KIF5C  
KIF6  
KIF9  
KIFAP3  
KIFBP  
KIFC1  
KIFC2  
KIFC3  
KIN  
KIR3DX1  
KIRREL3

KIT  
KITLG  
KIZ  
KLB  
KLC1  
KLC2  
KLC3  
KLC4  
KLF10  
KLF11  
KLF12  
KLF13  
KLF15  
KLF16  
KLF17  
KLF2  
KLF2P4  
KLF3  
KLF4  
KLF5  
KLF6  
KLF7  
KLF8  
KLF9  
KLHDC1  
KLHDC10  
KLHDC2  
KLHDC3  
KLHDC4  
KLHDC7A  
KLHDC7B  
KLHDC8A  
KLHDC8B  
KLHDC9  
KLHL11  
KLHL12  
KLHL13  
KLHL14  
KLHL15  
KLHL17  
KLHL18  
KLHL2  
KLHL20  
KLHL21  
KLHL22  
KLHL23  
KLHL24  
KLHL25  
KLHL26  
KLHL28  
KLHL29  
KLHL3  
KLHL30  
KLHL31  
KLHL32  
KLHL33  
KLHL35  
KLHL36

KLHL41  
KLHL42  
KLHL5  
KLHL6  
KLHL7  
KLHL8  
KLHL9  
KLK10  
KLK11  
KLK13  
KLK6  
KLK7  
KLKB1  
KLLN  
KLRA1P  
KLRB1  
KLRC1  
KLRC2  
KLRC4-KLRK1  
KLRD1  
KLRF1  
KLRG1  
KLRK1  
KMO  
KMT2A  
KMT2B  
KMT2C  
KMT2D  
KMT2E  
KMT5A  
KMT5B  
KMT5C  
KNDC1  
KNL1  
KNOP1  
KNSTRN  
KNTC1  
KPNA1  
KPNA2  
KPNA2P1  
KPNA2P3  
KPNA3  
KPNA4  
KPNA5  
KPNA6  
KPNA7  
KPNB1  
KPTN  
KRAS  
KRBA1  
KRBA2  
KRBOX4  
KRCC1  
KREMEN1  
KRI1  
KRIT1  
KRR1  
KRT10

KRT13  
KRT14  
KRT15  
KRT16  
KRT17  
KRT18  
KRT18P31  
KRT18P57  
KRT19  
KRT23  
KRT24  
KRT39  
KRT4  
KRT40  
KRT42P  
KRT5  
KRT6A  
KRT6B  
KRT7  
KRT78  
KRT8  
KRT80  
KRT87P  
KRT8P12  
KRT8P15  
KRT8P33  
KRT8P43  
KRT8P46  
KRTCAP2  
KRTCAP3  
KSR1  
KSR2  
KTI12  
KTN1  
KXD1  
KY  
KYAT1  
KYAT3  
KYNU  
L1TD1  
L2HGDH  
L3HYPDH  
L3MBTL1  
L3MBTL2  
L3MBTL3  
L3MBTL4  
LACC1  
LACTB  
LACTB2  
LAD1  
LAG3  
LAGE3  
LAIR1  
LAMA1  
LAMA2  
LAMA3  
LAMA4  
LAMA5

LAMB1  
LAMB2  
LAMB3  
LAMB4  
LAMC1  
LAMC2  
LAMC3  
LAMP1  
LAMP2  
LAMP3  
LAMTOR1  
LAMTOR2  
LAMTOR3  
LAMTOR4  
LAMTOR5  
LANCL1  
LANCL2  
LANCL3  
LAP3  
LAPTM4A  
LAPTM4B  
LAPTM5  
LARGE1  
LARGE2  
LARP1  
LARP1B  
LARP4  
LARP4B  
LARP6  
LARP7  
LARS1  
LARS2  
LAS1L  
LASP1  
LAT  
LAT2  
LATS1  
LATS2  
LAX1  
LAYN  
LBH  
LBHD1  
LBR  
LCA5  
LCA5L  
LCAT  
LCK  
LCLAT1  
LCMT1  
LCMT2  
LCN15  
LCN2  
LCOR  
LCORL  
LCP1  
LCP2  
LCT  
LCTL

LDAH  
LDB1  
LDB3  
LDHA  
LDHAL6A  
LDHAL6B  
LDHAL6CP  
LDHB  
LDHBP1  
LDHC  
LDHD  
LDLR  
LDLRAD1  
LDLRAD3  
LDLRAD4  
LDLRAP1  
LDOC1  
LEAP2  
LECT2  
LEF1  
LEKR1  
LEMD2  
LEMD3  
LENG1  
LENG8  
LENG9  
LEO1  
LEPR  
LEPROT  
LEPROTL1  
LETM1  
LETM2  
LETMD1  
LFNG  
LGALS1  
LGALS3  
LGALS3BP  
LGALS8  
LGALS9  
LGALS9B  
LGALS9C  
LGALSL  
LGI1  
LGMN  
LGR4  
LGR5  
LGR6  
LGSN  
LHFPL2  
LHFPL5  
LHFPL6  
LHPP  
LHX4  
LIAS  
LIF  
LIFR  
LIG1  
LIG3



LIG4  
LILRA1  
LILRA2  
LILRA3  
LILRA4  
LILRA5  
LILRA6  
LILRB1  
LILRB2  
LILRB3  
LILRB4  
LILRB5  
LIMA1  
LIMCH1  
LIMD1  
LIMD2  
LIME1  
LIMK1  
LIMK2  
LIMS1  
LIMS3  
LIN28A  
LIN28B  
LIN37  
LIN52  
LIN54  
LIN7A  
LIN7B  
LIN7C  
LIN9  
LINC00643  
LINC00672  
LINC00674  
LINC00680  
LINC00869  
LINC00888  
LINC00933  
LINC01145  
LINC01347  
LINC01667  
LINC01881  
LINC02210  
LINC02495  
LINC02618  
LINC02693  
LINGO2  
LINGO3  
LINS1  
LIPA  
LIPC  
LIPE  
LIPG  
LIPH  
LIPN  
LIPT1  
LIPT2  
LITAF  
LITAFD

LIX1  
LIX1L  
LLGL1  
LLGL2  
LLPH  
LMAN1  
LMAN2  
LMAN2L  
LMBR1  
LMBR1L  
LMBRD1  
LMBRD2  
LMCD1  
LMF1  
LMF2  
LMLN  
LMNA  
LMNB1  
LMNB2  
LMNTD1  
LMNTD2  
LMO2  
LMO3  
LMO4  
LMO7  
LMOD3  
LMTK2  
LMX1B  
LNPEP  
LNPk  
LNX1  
LNX2  
LONP1  
LONP2  
LONRF1  
LONRF2  
LONRF3  
LOX  
LOXHD1  
LOXL1  
LOXL2  
LOXL3  
LOXL4  
LPA  
LPAL2  
LPAR1  
LPAR2  
LPAR3  
LPAR5  
LPAR6  
LPCAT1  
LPCAT2  
LPCAT3  
LPCAT4  
LPGAT1  
LPIN1  
LPIN2  
LPIN3

LPO  
LPP  
LPXN  
LRAT  
LRATD1  
LRATD2  
LRBA  
LRCH1  
LRCH3  
LRCH4  
LRFN1  
LRFN3  
LRFN4  
LRG1  
LRGUK  
LRIF1  
LRIG1  
LRIG2  
LRIG3  
LRMDA  
LRMP  
LRP1  
LRP10  
LRP11  
LRP12  
LRP1B  
LRP2  
LRP2BP  
LRP3  
LRP4  
LRP5  
LRP5L  
LRP6  
LRP8  
LRPAP1  
LRPPRC  
LRR1  
LRRC1  
LRRC10  
LRRC10B  
LRRC14  
LRRC17  
LRRC18  
LRRC19  
LRRC2  
LRRC20  
LRRC23  
LRRC25  
LRRC27  
LRRC28  
LRRC29  
LRRC34  
LRRC36  
LRRC37A  
LRRC37A11P  
LRRC37A15P  
LRRC37A16P  
LRRC37A17P

LRRC37A2  
LRRC37A3  
LRRC37A4P  
LRRC37A5P  
LRRC37A6P  
LRRC37A7P  
LRRC37A9P  
LRRC37B  
LRRC37BP1  
LRRC39  
LRRC4  
LRRC40  
LRRC41  
LRRC42  
LRRC43  
LRRC45  
LRRC46  
LRRC47  
LRRC49  
LRRC56  
LRRC57  
LRRC58  
LRRC59  
LRRC6  
LRRC61  
LRRC63  
LRRC66  
LRRC69  
LRRC70  
LRRC71  
LRRC73  
LRRC74B  
LRRC75A  
LRRC8A  
LRRC8B  
LRRC8C  
LRRC8D  
LRRC8E  
LRRCC1  
LRRD1  
LRRFIP1  
LRRFIP1P1  
LRRFIP2  
LRRIQ1  
LRRIQ3  
LRRK1  
LRRK2  
LRRN1  
LRRN2  
LRRN3  
LRRN4CL  
LRRTM2  
LRRTM4  
LRSAM1  
LRTOMT  
LRWD1  
LSAMP  
LSG1

LSM1  
LSM10  
LSM11  
LSM12  
LSM12P1  
LSM14A  
LSM14B  
LSM2  
LSM3  
LSM4  
LSM5  
LSM6  
LSM7  
LSM8  
LSMEM1  
LSP1  
LSP1P4  
LSR  
LSS  
LST1  
LTA  
LTA4H  
LTB  
LTB4R  
LTB4R2  
LTBP1  
LTBP2  
LTBP3  
LTBP4  
LTBR  
LTF  
LTK  
LTN1  
LTO1  
LTV1  
LUC7L  
LUC7L2  
LUC7L3  
LURAP1  
LURAP1L  
LUZP1  
LUZP2  
LXN  
LY6D  
LY6E  
LY6G5B  
LY6G5C  
LY6K  
LY75  
LY75-CD302  
LY86  
LY9  
LY96  
LYAR  
LYL1  
LYN  
LYNX1  
LYPD2

LYPD3  
LYPD5  
LYPD6  
LYPD6B  
LYPD9P  
LYPLA1  
LYPLA2  
LYPLAL1  
LYRM1  
LYRM2  
LYRM4  
LYRM7  
LYRM9  
LYSMD1  
LYSMD2  
LYSMD3  
LYSMD4  
LYST  
LYVE1  
LYZ  
LZIC  
LZTFL1  
LZTR1  
LZTS1  
LZTS2  
LZTS3  
M1AP  
M6PR  
MAATS1  
MAB21L1  
MAB21L2  
MAB21L3  
MAB21L4  
MACC1  
MACF1  
MACIR  
MACO1  
MACROD1  
MACROD2  
MACROH2A1  
MACROH2A2  
MAD1L1  
MAD2L1  
MAD2L1BP  
MAD2L2  
MADD  
MAEA  
MAF  
MAF1  
MAFB  
MAFF  
MAFG  
MAFK  
MAGEA10  
MAGED1  
MAGED2  
MAGEF1  
MAGEH1

MAGI1  
MAGI2  
MAGI3  
MAGIX  
MAGOH  
MAGOHB  
MAGT1  
MAIP1  
MAK  
MAK16  
MAL  
MAL2  
MALL  
MALSU1  
MALT1  
MAMDC2  
MAMDC4  
MAML1  
MAML2  
MAML3  
MAMLD1  
MAN1A1  
MAN1A2  
MAN1B1  
MAN1C1  
MAN2A1  
MAN2A2  
MAN2B1  
MAN2B2  
MAN2C1  
MANBA  
MANBAL  
MANEA  
MANEAL  
MANF  
MANSC1  
MAOA  
MAOB  
MAP10  
MAP11  
MAP1A  
MAP1B  
MAP1LC3A  
MAP1LC3B  
MAP1LC3B2  
MAP1S  
MAP2  
MAP2K1  
MAP2K2  
MAP2K3  
MAP2K4  
MAP2K5  
MAP2K6  
MAP2K7  
MAP3K1  
MAP3K10  
MAP3K11  
MAP3K12

MAP3K13  
MAP3K14  
MAP3K15  
MAP3K19  
MAP3K2  
MAP3K20  
MAP3K21  
MAP3K3  
MAP3K4  
MAP3K5  
MAP3K6  
MAP3K7  
MAP3K7CL  
MAP3K8  
MAP3K9  
MAP4  
MAP4K1  
MAP4K2  
MAP4K3  
MAP4K4  
MAP4K5  
MAP6  
MAP7  
MAP7D1  
MAP7D2  
MAP7D3  
MAP9  
MAPK1  
MAPK10  
MAPK12  
MAPK13  
MAPK14  
MAPK15  
MAPK1IP1L  
MAPK3  
MAPK6  
MAPK6P3  
MAPK7  
MAPK8  
MAPK8IP1  
MAPK8IP2  
MAPK8IP3  
MAPK9  
MAPKAP1  
MAPKAPK2  
MAPKAPK3  
MAPKAPK5  
MAPKBP1  
MAPRE1  
MAPRE2  
MAPRE3  
MAPT  
MARCHF1  
MARCHF10  
MARCHF2  
MARCHF3  
MARCHF4  
MARCHF5



MARCHF6  
MARCHF7  
MARCHF8  
MARCHF9  
MARCKS  
MARCKSL1  
MARCKSL1P2  
MARF1  
MARK1  
MARK2  
MARK2P8  
MARK3  
MARK4  
MARS1  
MARS2  
MARVELD1  
MARVELD2  
MARVELD3  
MAS1  
MASP1  
MASP2  
MAST1  
MAST2  
MAST3  
MAST4  
MASTL  
MAT1A  
MAT2A  
MAT2B  
MATK  
MATN1  
MATN2  
MATR3  
MAU2  
MAVS  
MAX  
MAZ  
MB  
MB21D2  
MBD1  
MBD2  
MBD3  
MBD3L1  
MBD4  
MBD5  
MBD6  
MBIP  
MBLAC2  
MBNL1  
MBNL2  
MBNL3  
MBOAT1  
MBOAT2  
MBOAT7  
MBP  
MBTD1  
MBTPS1  
MBTPS2

MC1R  
MC2R  
MCAM  
MCAT  
MCC  
MCCC1  
MCCC2  
MCEE  
MCEMP1  
MCF2L  
MCF2L2  
MCFD2  
MCIDAS  
MCL1  
MCM10  
MCM2  
MCM3  
MCM3AP  
MCM4  
MCM5  
MCM6  
MCM7  
MCM8  
MCM9  
MCMBP  
MCMDC2  
MCOLN1  
MCOLN2  
MCOLN3  
MCPH1  
MCRIP1  
MCRIP2  
MCRS1  
MCTP1  
MCTP2  
MCTS1  
MCU  
MCUB  
MCUR1  
MDC1  
MDFI  
MDFIC  
MDGA1  
MDH1  
MDH1B  
MDH2  
MDK  
MDM1  
MDM2  
MDM4  
MDN1  
ME1  
ME2  
ME3  
MEA1  
MEAF6  
MEAK7  
MECOM

MECP2  
MECR  
MED1  
MED10  
MED11  
MED12  
MED12L  
MED13  
MED13L  
MED14  
MED15  
MED15P9  
MED16  
MED17  
MED18  
MED19  
MED20  
MED21  
MED22  
MED23  
MED24  
MED25  
MED26  
MED27  
MED28  
MED29  
MED30  
MED31  
MED4  
MED6  
MED7  
MED8  
MED9  
MEF2A  
MEF2C  
MEF2D  
MEFV  
MEGF10  
MEGF11  
MEGF6  
MEGF8  
MEGF9  
MEI1  
MEIG1  
MEIOC  
MEIS1  
MEIS2  
MEIS3  
MEIS3P1  
MEIS3P2  
MELK  
MELTF  
MEMO1  
MEN1  
MEP1A  
MEPCE  
MERTK  
MESD

MEST  
MET  
METAP1  
METAP1D  
METAP2  
METRN  
METRNL  
METTL1  
METTL14  
METTL15  
METTL15P1  
METTL16  
METTL17  
METTL18  
METTL21A  
METTL21EP  
METTL22  
METTL23  
METTL25  
METTL26  
METTL27  
METTL2A  
METTL2B  
METTL3  
METTL4  
METTL5  
METTL6  
METTL7A  
METTL8  
METTL9  
MEX3A  
MEX3C  
MEX3D  
MFAP1  
MFAP2  
MFAP3  
MFAP3L  
MFAP5  
MFF  
MFGE8  
MFHAS1  
MFN1  
MFN2  
MFNG  
MFSD1  
MFSD10  
MFSD11  
MFSD12  
MFSD13A  
MFSD14A  
MFSD14B  
MFSD14C  
MFSD1P1  
MFSD2A  
MFSD2B  
MFSD3  
MFSD4A  
MFSD4B

MFSD5  
MFSD6  
MFSD8  
MFSD9  
MGA  
MGAM  
MGAM2  
MGAT1  
MGAT2  
MGAT3  
MGAT4A  
MGAT4B  
MGAT4C  
MGAT5  
MGLL  
MGME1  
MGMT  
MGP  
MGRN1  
MGST1  
MGST2  
MGST3  
MIA-RAB4B  
MIA2  
MIA3  
MIB1  
MIB2  
MICA  
MICAL1  
MICAL2  
MICAL3  
MICALL1  
MICALL2  
MICB  
MICOS10  
MICOS10-NBL1  
MICOS13  
MICU1  
MICU2  
MICU3  
MID1  
MID1IP1  
MID2  
MIDEAS  
MIDN  
MIEF1  
MIEF2  
MIEN1  
MIER1  
MIER2  
MIER3  
MIF  
MIF4GD  
MIGA1  
MIGA2  
MIIP  
MILR1  
MINAR1

MINDY1  
MINDY2  
MINDY3  
MINDY4  
MINK1  
MINPP1  
MIOS  
MIPEP  
MIPOL1  
MIR1915HG  
MIS12  
MIS18A  
MIS18BP1  
MISP  
MISP3  
MITD1  
MITF  
MIXL1  
MKI67  
MKKS  
MKLN1  
MKNK1  
MKNK2  
MKRN1  
MKRN2  
MKRN2OS  
MKRN3  
MKRN5P  
MKS1  
MKX  
MLANA  
MLEC  
MLF1  
MLF2  
MLH1  
MLH3  
MLIP  
MLKL  
MLLT1  
MLLT10  
MLLT11  
MLLT3  
MLLT6  
MLPH  
MLST8  
MLX  
MLXIP  
MLXIPL  
MLYCD  
MMAA  
MMAB  
MMACHC  
MMADHC  
MMD  
MME  
MMGT1  
MMP1  
MMP10

MMP12  
MMP13  
MMP14  
MMP15  
MMP19  
MMP24  
MMP24OS  
MMP25  
MMP7  
MMP8  
MMP9  
MMRN2  
MMS19  
MMS22L  
MMUT  
MNAT1  
MND1  
MNDA  
MNS1  
MNT  
MOAP1  
MOB1A  
MOB1B  
MOB2  
MOB3A  
MOB3B  
MOB3C  
MOB4  
MOBP  
MOCOS  
MOCS2  
MOCS3  
MOG  
MOGAT3  
MOGS  
MOK  
MON1A  
MON1B  
MON2  
MORC2  
MORC3  
MORC4  
MORF4L1  
MORF4L2  
MORN1  
MORN2  
MORN3  
MORN4  
MORN5  
MOSMO  
MOSPD1  
MOSPD2  
MOSPD3  
MOV10  
MOV10L1  
MPC1  
MPC2  
MPDU1

MPDZ  
MPEG1  
MPG  
MPHOSPH10  
MPHOSPH6  
MPHOSPH8  
MPHOSPH9  
MPI  
MPIG6B  
MPLKIP  
MPND  
MPP1  
MPP4  
MPP5  
MPP6  
MPP7  
MPPE1  
MPPED2  
MPRIP  
MPST  
MPV17  
MPV17L  
MPV17L2  
MPZL1  
MPZL2  
MPZL3  
MR1  
MRAP2  
MRAS  
MRC1  
MRC2  
MRE11  
MREG  
MRFAP1  
MRFAP1L1  
MRGBP  
MRI1  
MRLN  
MRM2  
MRM3  
MRNIP  
MRO  
MROH1  
MROH3P  
MROH6  
MROH7  
MROH7-TTC4  
MROH8  
MROH9  
MRPL1  
MRPL10  
MRPL11  
MRPL12  
MRPL13  
MRPL14  
MRPL15  
MRPL16  
MRPL17



MRPL18  
MRPL19  
MRPL2  
MRPL20  
MRPL21  
MRPL22  
MRPL23  
MRPL24  
MRPL27  
MRPL28  
MRPL3  
MRPL30  
MRPL32  
MRPL33  
MRPL34  
MRPL35  
MRPL36  
MRPL37  
MRPL38  
MRPL39  
MRPL4  
MRPL40  
MRPL41  
MRPL42  
MRPL42P6  
MRPL43  
MRPL44  
MRPL45  
MRPL45P2  
MRPL46  
MRPL47  
MRPL48  
MRPL49  
MRPL50  
MRPL51  
MRPL52  
MRPL53  
MRPL54  
MRPL55  
MRPL57  
MRPL58  
MRPL9  
MRPS10  
MRPS11  
MRPS12  
MRPS14  
MRPS15  
MRPS16  
MRPS17  
MRPS17P1  
MRPS18A  
MRPS18B  
MRPS18C  
MRPS2  
MRPS21  
MRPS22  
MRPS23  
MRPS24

MRPS25  
MRPS26  
MRPS27  
MRPS28  
MRPS30  
MRPS31  
MRPS31P4  
MRPS31P5  
MRPS33  
MRPS34  
MRPS35  
MRPS36  
MRPS5  
MRPS6  
MRPS7  
MRPS9  
MRRF  
MRS2  
MRTFA  
MRTFB  
MRTO4  
MRVI1  
MS4A1  
MS4A10  
MS4A14  
MS4A2  
MS4A4A  
MS4A6A  
MS4A7  
MS4A8  
MSANTD1  
MSANTD2  
MSANTD3  
MSANTD4  
MSH2  
MSH3  
MSH5  
MSH5-SAPCD1  
MSH6  
MSI2  
MSL1  
MSL2  
MSL3  
MSL3P1  
MSLN  
MSMB  
MSMO1  
MSN  
MSR1  
MSRA  
MSRB1  
MSRB2  
MSRB3  
MSS51  
MST1  
MST1L  
MST1R  
MSTO1

MT-ATP6  
MT-CO1  
MT-CO2  
MT-CO3  
MT-CYB  
MT-ND1  
MT-ND2  
MT-ND3  
MT-ND4  
MT-ND4L  
MT-ND5  
MT-ND6  
MT1E  
MT1F  
MT1X  
MT2A  
MT3  
MTA1  
MTA2  
MTA3  
MTAP  
MTARC1  
MTARC2  
MTATP6P1  
MTATP6P11  
MTATP6P2  
MTATP6P26  
MTBP  
MTCH1  
MTCH2  
MTCL1  
MTCO1P1  
MTCO1P11  
MTCO1P12  
MTCO1P15  
MTCO1P2  
MTCO1P25  
MTCO1P40  
MTCO1P42  
MTCO1P53  
MTCO2P12  
MTCO2P22  
MTCO3P12  
MTCO3P13  
MTCO3P22  
MTCO3P43  
MTCYBP18  
MTCYBP23  
MTCYBP3  
MTCYBP35  
MTDH  
MTERF1  
MTERF2  
MTERF3  
MTERF4  
MTF1  
MTF2  
MTFMT

MTFP1  
MTFR1  
MTFR1L  
MTFR2  
MTG1  
MTG2  
MTHFD1  
MTHFD1L  
MTHFD1P1  
MTHFD2  
MTHFD2L  
MTHFD2P1  
MTHFR  
MTHFS  
MTHFSD  
MTIF2  
MTIF3  
MTLN  
MTM1  
MTMR1  
MTMR10  
MTMR11  
MTMR12  
MTMR14  
MTMR2  
MTMR3  
MTMR4  
MTMR6  
MTMR7  
MTMR8  
MTMR9  
MTMR9LP  
MTND1P11  
MTND1P23  
MTND1P8  
MTND2P12  
MTND2P28  
MTND2P5  
MTND2P9  
MTND4P12  
MTND4P14  
MTND4P16  
MTND4P22  
MTND4P23  
MTND4P24  
MTND4P26  
MTND4P35  
MTND4P6  
MTND5P10  
MTND5P11  
MTND5P12  
MTND5P14  
MTND5P2  
MTND5P24  
MTND5P28  
MTND5P32  
MTND6P22  
MTND6P3

MTND6P4  
MTO1  
MTOR  
MTPAP  
MTPN  
MTR  
MTRES1  
MTREX  
MTRF1  
MTRF1L  
MTRNR2L1  
MTRNR2L10  
MTRNR2L11  
MTRNR2L12  
MTRNR2L13  
MTRNR2L3  
MTRNR2L4  
MTRNR2L5  
MTRNR2L6  
MTRNR2L7  
MTRNR2L8  
MTRR  
MTSS1  
MTSS2  
MTURN  
MTUS1  
MTUS2  
MTX1  
MTX2  
MTX3  
MUC1  
MUC12  
MUC13  
MUC15  
MUC16  
MUC17  
MUC19  
MUC2  
MUC20  
MUC20P1  
MUC21  
MUC22  
MUC3A  
MUC4  
MUC5AC  
MUC5B  
MUC6  
MUC7  
MUCL1  
MUCL3  
MUL1  
MUS81  
MUTYH  
MVB12A  
MVB12B  
MVD  
MVK  
MVP

MX1  
MX2  
MXD1  
MXD3  
MXD4  
MXI1  
MXRA5  
MXRA7  
MYADM  
MYB  
MYBBP1A  
MYBL1  
MYBL2  
MYBPC1  
MYBPC3  
MYC  
MYCBP  
MYCBP2  
MYCBPAP  
MYCL  
MYCT1  
MYD88  
MYDGF  
MYEF2  
MYEOV  
MYH10  
MYH11  
MYH14  
MYH15  
MYH16  
MYH3  
MYH7B  
MYH9  
MYL12A  
MYL12B  
MYL5  
MYL6  
MYL6B  
MYL9  
MYLIP  
MYLK  
MYLK3  
MYNN  
MYO10  
MYO15A  
MYO15B  
MYO16  
MYO18A  
MYO19  
MYO1B  
MYO1C  
MYO1D  
MYO1E  
MYO1F  
MYO1G  
MYO1H  
MYO3B  
MYO5A

MYO5B  
MYO5C  
MYO6  
MYO7A  
MYO7B  
MYO9A  
MYO9B  
MYOCOS  
MYOF  
MYOM1  
MYOM2  
MYOM3  
MYORG  
MYOT  
MYOZ3  
MYPOP  
MYRF  
MYRFL  
MYRIP  
MYSM1  
MYT1L  
MYZAP  
MZB1  
MZF1  
MZT1  
MZT2A  
MZT2B  
N4BP1  
N4BP2  
N4BP2L1  
N4BP2L2  
N4BP3  
N6AMT1  
NAA10  
NAA15  
NAA16  
NAA20  
NAA25  
NAA30  
NAA35  
NAA38  
NAA40  
NAA50  
NAA60  
NAA80  
NAAA  
NAALADL2  
NAB1  
NAB2  
NABP1  
NABP2  
NACA  
NACA4P  
NACC1  
NACC2  
NADK  
NADK2  
NADSYN1

NAE1  
NAF1  
NAGA  
NAGK  
NAGLU  
NAGPA  
NAIF1  
NAIP  
NAIPP1  
NAIPP2  
NAIPP3  
NAIPP4  
NALCN  
NAMPT  
NAMPTP1  
NANOG  
NANOGP1  
NANOS1  
NANP  
NANS  
NAP1L1  
NAP1L4  
NAP1L4P1  
NAP1L5  
NAPA  
NAPB  
NAPEPLD  
NAPG  
NAPRT  
NAPSB  
NARF  
NARS1  
NARS2  
NASP  
NAT1  
NAT10  
NAT14  
NAT8  
NAT9  
NATD1  
NAV1  
NAV2  
NAV3  
NAXD  
NAXE  
NBAS  
NBDY  
NBEA  
NBEAL1  
NBEAL2  
NBEAP1  
NBL1  
NBN  
NBPF1  
NBPF10  
NBPF11  
NBPF12  
NBPF14



NBPF15  
NBPF19  
NBPF20  
NBPF25P  
NBPF26  
NBPF2P  
NBPF3  
NBPF8  
NBPF9  
NBR1  
NCALD  
NCAM1  
NCAM2  
NCAPD2  
NCAPD3  
NCAPG  
NCAPG2  
NCAPH  
NCAPH2  
NCBP1  
NCBP2  
NCBP2AS2  
NCBP3  
NCCRP1  
NCDN  
NCEH1  
NCF1  
NCF1B  
NCF1C  
NCF2  
NCF4  
NCK1  
NCK2  
NCKAP1  
NCKAP1L  
NCKAP5  
NCKAP5L  
NCKIPSD  
NCL  
NCLN  
NCLP1  
NCMAP  
NCOA1  
NCOA2  
NCOA3  
NCOA4  
NCOA5  
NCOA6  
NCOA7  
NCOR1  
NCOR2  
NCR1  
NCR3LG1  
NCS1  
NCSTN  
NDC1  
NDC80  
NDE1

NDEL1  
NDFIP1  
NDFIP2  
NDOR1  
NDRG1  
NDRG2  
NDRG3  
NDRG4  
NDST1  
NDST2  
NDST3  
NDUFA1  
NDUFA10  
NDUFA11  
NDUFA12  
NDUFA13  
NDUFA2  
NDUFA3  
NDUFA4  
NDUFA5  
NDUFA6  
NDUFA7  
NDUFA8  
NDUFA9  
NDUFAB1  
NDUFAF1  
NDUFAF2  
NDUFAF3  
NDUFAF4  
NDUFAF5  
NDUFAF6  
NDUFAF7  
NDUFAF8  
NDUFB1  
NDUFB10  
NDUFB11  
NDUFB2  
NDUFB3  
NDUFB4  
NDUFB4P11  
NDUFB5  
NDUFB6  
NDUFB7  
NDUFB8  
NDUFB9  
NDUFC1  
NDUFC2  
NDUFC2-KCTD14  
NDUFS1  
NDUFS2  
NDUFS3  
NDUFS4  
NDUFS5  
NDUFS6  
NDUFS7  
NDUFS8  
NDUFV1  
NDUFV2

NDUFV2P1  
NDUFV3  
NEB  
NEBL  
NECAB1  
NECAB3  
NECAP1  
NECAP2  
NECTIN1  
NECTIN2  
NECTIN3  
NECTIN4  
NEDD1  
NEDD4  
NEDD4L  
NEDD8  
NEDD9  
NEGR1  
NEIL1  
NEIL2  
NEIL3  
NEK1  
NEK10  
NEK11  
NEK2  
NEK3  
NEK4  
NEK5  
NEK6  
NEK7  
NEK8  
NEK9  
NELFA  
NELFB  
NELFCD  
NELFE  
NELL2  
NEMF  
NEMP1  
NEMP2  
NENF  
NEO1  
NEPRO  
NET1  
NETO2  
NEU1  
NEU3  
NEURL1  
NEURL1B  
NEURL3  
NEURL4  
NEXMIF  
NEXN  
NF1  
NF2  
NFAM1  
NFASC  
NFAT5

NFATC1  
NFATC2  
NFATC2IP  
NFATC3  
NFE2  
NFE2L1  
NFE2L2  
NFE2L3  
NFE4  
NFIA  
NFIB  
NFIC  
NFIL3  
NFIK  
NFKB1  
NFKB2  
NFKBIA  
NFKBIB  
NFKBID  
NFKBIE  
NFKBIL1  
NFKBIZ  
NFRKB  
NFS1  
NFU1  
NFX1  
NFXL1  
NFYA  
NFYB  
NFYC  
NGDN  
NGEF  
NGLY1  
NGRN  
NHEJ1  
NHLRC1  
NHLRC2  
NHLRC3  
NHLRC4  
NHP2  
NHS  
NHSL1  
NHSL2  
NIBAN1  
NIBAN2  
NIBAN3  
NICN1  
NID1  
NID2  
NIF3L1  
NIFK  
NIM1K  
NIN  
NINJ1  
NINJ2  
NINL  
NIP7  
NIPA1

NIPA2  
NIPAL1  
NIPAL2  
NIPAL3  
NIPAL4  
NIPBL  
NIPSNAP1  
NIPSNAP2  
NIPSNAP3A  
NIPSNAP3B  
NISCH  
NIT1  
NIT2  
NKAP  
NKAPD1  
NKAPL  
NKAPP1  
NKD1  
NKG7  
NKIRAS1  
NKIRAS2  
NKRF  
NKTR  
NKX3-1  
NLE1  
NLGN3  
NLGN4X  
NLGN4Y  
NLK  
NLN  
NLRC3  
NLRC4  
NLRC5  
NLRP1  
NLRP10  
NLRP12  
NLRP14  
NLRP2  
NLRP3  
NLRP6  
NLRP7  
NLRP9P1  
NLRX1  
NMB  
NMD3  
NME1  
NME2  
NME3  
NME4  
NME5  
NME6  
NME7  
NME9  
NMI  
NMNAT1  
NMNAT2  
NMNAT3  
NMRAL1

NMRK1  
NMT1  
NMT2  
NMUR1  
NNT  
NOA1  
NOB1  
NOC2L  
NOC3L  
NOC4L  
NOCT  
NOD1  
NOD2  
NOL10  
NOL11  
NOL12  
NOL3  
NOL4L  
NOL6  
NOL7  
NOL8  
NOL9  
NOLC1  
NOM1  
NOMO1  
NOMO2  
NOMO3  
NONO  
NONOP2  
NOP10  
NOP14  
NOP16  
NOP2  
NOP53  
NOP56  
NOP58  
NOP9  
NOS1  
NOS1AP  
NOS2  
NOS2P1  
NOS2P3  
NOS3  
NOSIP  
NOSTRIN  
NOTCH1  
NOTCH2  
NOTCH2NLA  
NOTCH3  
NOTCH4  
NOVA1  
NOX4  
NOX5  
NOXA1  
NOXRED1  
NPAP1  
NPAS2  
NPAS3

NPAT  
NPB  
NPBWR1  
NPC1  
NPC2  
NPDC1  
NPEPL1  
NPEPPS  
NPFFR1  
NPHP1  
NPHP3  
NPHP3-ACAD11  
NPHP4  
NPHS1  
NPIPA1  
NPIPA3  
NPIPA5  
NPIPA7  
NPIPA8  
NPIPA9  
NPIPB11  
NPIPB12  
NPIPB13  
NPIPB14P  
NPIPB15  
NPIPB2  
NPIPB3  
NPIPB4  
NPIPB5  
NPIPB6  
NPIPB9  
NPIPP1  
NPL  
NPLOC4  
NPM1  
NPM1P13  
NPM1P14  
NPM1P25  
NPM1P26  
NPM1P27  
NPM1P29  
NPM1P35  
NPM1P39  
NPM2  
NPM3  
NPNT  
NPR2  
NPR3  
NPRL2  
NPRL3  
NPTN  
NPTX1  
NPTXR  
NPY6R  
NQO1  
NQO2  
NR1D1  
NR1D2

NR1H2  
NR1H3  
NR1I2  
NR1I3  
NR2C1  
NR2C2  
NR2C2AP  
NR2E1  
NR2F2  
NR2F6  
NR3C1  
NR3C2  
NR4A1  
NR4A2  
NR4A3  
NR5A2  
NR6A1  
NRARP  
NRAS  
NRBF2  
NRBP1  
NRBP2  
NRCAM  
NRDC  
NRDE2  
NREP  
NRF1  
NRG2  
NRG4  
NRIP1  
NRIP2  
NRIP3  
NRM  
NRP1  
NRP2  
NRROS  
NRSN1  
NRSN2  
NRXN1  
NRXN3  
NSA2  
NSD1  
NSD2  
NSD3  
NSDHL  
NSF  
NSFL1C  
NSFP1  
NSG1  
NSL1  
NSMAF  
NSMCE1  
NSMCE2  
NSMCE3  
NSMCE4A  
NSMF  
NSRP1  
NSRP1P1



NSUN2  
NSUN3  
NSUN4  
NSUN5  
NSUN5P1  
NSUN5P2  
NSUN6  
NSUN7  
NT5C  
NT5C1B  
NT5C2  
NT5C3A  
NT5C3AP1  
NT5C3B  
NT5DC1  
NT5DC2  
NT5DC3  
NT5E  
NTAN1  
NTMT1  
NTN1  
NTN4  
NTNG2  
NTPCR  
NTRK2  
NTRK3  
NTS  
NUAK1  
NUAK2  
NUB1  
NUBP1  
NUBP2  
NUBPL  
NUCB1  
NUCB2  
NUCKS1  
NUDC  
NUDCD1  
NUDCD2  
NUDCD3  
NUDT1  
NUDT12  
NUDT13  
NUDT14  
NUDT15  
NUDT16  
NUDT16L1  
NUDT16P1  
NUDT17  
NUDT18  
NUDT19  
NUDT2  
NUDT21  
NUDT22  
NUDT3  
NUDT4  
NUDT4B  
NUDT4P2

NUDT5  
NUDT6  
NUDT7  
NUDT8  
NUDT9  
NUFIP1  
NUFIP2  
NUGGC  
NUMA1  
NUMB  
NUMBL  
NUP107  
NUP133  
NUP153  
NUP155  
NUP160  
NUP188  
NUP205  
NUP210  
NUP210L  
NUP214  
NUP35  
NUP37  
NUP42  
NUP43  
NUP50  
NUP54  
NUP58  
NUP62  
NUP62CL  
NUP85  
NUP88  
NUP93  
NUP98  
NUPR1  
NUS1  
NUS1P1  
NUSAP1  
NUTF2  
NUTM2A  
NUTM2B  
NUTM2D  
NUTM2G  
NVL  
NWD1  
NXF1  
NXF2  
NXF2B  
NXF3  
NXN  
NXNL2  
NXPE3  
NXT1  
NXT2  
NYNRIN  
OAF  
OARD1  
OAS1

OAS2  
OAS3  
OASL  
OAT  
OAZ1  
OAZ2  
OAZ3  
OBI1  
OBSCN  
OBSL1  
OCEL1  
OCIAD1  
OCIAD2  
OCLN  
OCRL  
ODAM  
ODAPH  
ODC1  
ODCP  
ODF2  
ODF2L  
ODF3B  
ODR4  
OFD1  
OFD1P17  
OGA  
OGDH  
OGFOD1  
OGFOD2  
OGFOD3  
OGFR  
OGFRL1  
OGG1  
OGN  
OGT  
OLA1  
OLA1P2  
OLA1P3  
OLAH  
OLFM4  
OLFM5P  
OLFML1  
OLFML2A  
OLFML2B  
OLFML3  
OLR1  
OMA1  
OMG  
ONECUT1  
ONECUT2  
ONECUT3  
OPA1  
OPA3  
OPHN1  
OPLAH  
OPN3  
OPRD1  
OPRL1

OPRM1  
OPTN  
OR11A1  
OR13K1P  
OR1F2P  
OR2A4  
OR2A9P  
OR2C3  
OR4F15  
OR51B5  
OR52A1  
OR52B6  
OR52I1  
OR52K1  
OR52K3P  
OR5A2  
OR5BA1P  
OR6J1  
OR7A5  
OR7D2  
OR7E104P  
OR7E122P  
OR7E14P  
OR7E22P  
OR7E36P  
OR7E38P  
OR7E47P  
OR7E94P  
ORAI1  
ORAI2  
ORAI3  
ORC1  
ORC2  
ORC3  
ORC4  
ORC5  
ORC6  
ORMDL1  
ORMDL2  
ORMDL3  
OS9  
OSBP  
OSBP2  
OSBPL10  
OSBPL11  
OSBPL1A  
OSBPL2  
OSBPL3  
OSBPL5  
OSBPL6  
OSBPL7  
OSBPL8  
OSBPL9  
OSCAR  
OSCP1  
OSER1  
OSGEP  
OSGEPL1

OSGIN1  
OSGIN2  
OSM  
OSMR  
OSR1  
OST4  
OSTC  
OSTF1  
OSTM1  
OTOA  
OTOAP1  
OTOF  
OTUB1  
OTUB2  
OTUD1  
OTUD3  
OTUD4  
OTUD4P1  
OTUD5  
OTUD6A  
OTUD6B  
OTUD7A  
OTUD7B  
OTULIN  
OTULINL  
OTX1  
OTX2  
OVCA2  
OVGP1  
OVOL1  
OVOL2  
OXA1L  
OXCT1  
OXLD1  
OXNAD1  
OXR1  
OXSM  
OXSR1  
OXTR  
P2RX1  
P2RX4  
P2RX5  
P2RX5-TAX1BP3  
P2RX6  
P2RX7  
P2RY1  
P2RY10  
P2RY11  
P2RY12  
P2RY13  
P2RY14  
P2RY2  
P2RY6  
P2RY8  
P3H1  
P3H2  
P3H3  
P3H4

P3R3URF-PIK3R3  
P4HA1  
P4HA2  
P4HA3  
P4HB  
P4HTM  
PA2G4  
PA2G4P4  
PA2G4P6  
PAAF1  
PABPC1  
PABPC1L  
PABPC1P4  
PABPC4  
PABPN1  
PACC1  
PACRG  
PACRGL  
PACS1  
PACS2  
PACSIN1  
PACSIN2  
PACSIN3  
PADI1  
PADI2  
PADI3  
PADI4  
PAF1  
PAFAH1B1  
PAFAH1B2  
PAFAH1B3  
PAFAH2  
PAG1  
PAGR1  
PAICS  
PAIP1  
PAIP2  
PAIP2B  
PAK1  
PAK1IP1  
PAK2  
PAK3  
PAK4  
PAK6  
PALB2  
PALD1  
PALLD  
PALM  
PALM2AKAP2  
PALMD  
PAM  
PAM16  
PAMR1  
PAN2  
PAN3  
PANK1  
PANK2  
PANK3

PANK4  
PANO1  
PANX1  
PANX2  
PAOX  
PAPLN  
PAPOLA  
PAPOLG  
PAPPA  
PAPPA2  
PAPSS1  
PAPSS2  
PAQR3  
PAQR4  
PAQR5  
PAQR7  
PAQR8  
PARD3  
PARD3B  
PARD6A  
PARD6B  
PARD6G  
PARG  
PARGP1  
PARK7  
PARL  
PARM1  
PARN  
PARP1  
PARP10  
PARP11  
PARP12  
PARP14  
PARP15  
PARP16  
PARP2  
PARP3  
PARP4  
PARP4P2  
PARP6  
PARP8  
PARP9  
PARPBP  
PARS2  
PARVA  
PARVB  
PARVG  
PASK  
PATE2  
PATE4  
PATJ  
PATL1  
PATL2  
PATZ1  
PAWR  
PAX3  
PAX5  
PAX6

PAX7  
PAX8  
PAX9  
PAXBP1  
PAXIP1  
PAXX  
PBDC1  
PBLD  
PBOV1  
PBRM1  
PBX1  
PBX2  
PBX3  
PBX4  
PBXIP1  
PC  
PCARE  
PCBD1  
PCBD2  
PCBP1  
PCBP2  
PCBP3  
PCBP4  
PCCA  
PCCB  
PCDH1  
PCDH10  
PCDH11X  
PCDH11Y  
PCDH12  
PCDH15  
PCDH17  
PCDH19  
PCDH20  
PCDH7  
PCDH9  
PCDHA10  
PCDHA4  
PCDHA9  
PCDHAC1  
PCDHAC2  
PCDHB1  
PCDHB11  
PCDHB13  
PCDHB14  
PCDHB16  
PCDHB2  
PCDHB9  
PCDHGA1  
PCDHGA10  
PCDHGA11  
PCDHGA6  
PCDHGA8  
PCDHGA9  
PCDHGB4  
PCDHGB6  
PCDHGB7  
PCDHGB8P



PCDHGC3  
PCDHGC4  
PCED1A  
PCED1B  
PCF11  
PCGF1  
PCGF2  
PCGF3  
PCGF5  
PCGF6  
PCID2  
PCIF1  
PCK1  
PCK2  
PCLAF  
PCLO  
PCM1  
PCMT1  
PCMTD1  
PCMTD2  
PCNA  
PCNP  
PCNT  
PCNX1  
PCNX2  
PCNX3  
PCNX4  
PCOLCE  
PCP4L1  
PCSK1  
PCSK1N  
PCSK2  
PCSK4  
PCSK5  
PCSK6  
PCSK7  
PCTP  
PCYOX1  
PCYOX1L  
PCYT1A  
PCYT1B  
PCYT2  
PDAP1  
PDCD1  
PDCD10  
PDCD11  
PDCD1LG2  
PDCD2  
PDCD2L  
PDCD4  
PDCD5  
PDCD6  
PDCD6IP  
PDCD6IPP1  
PDCD6IPP2  
PDCD7  
PDCL  
PDCL3

PDCL3P4  
PDE10A  
PDE11A  
PDE12  
PDE1A  
PDE1B  
PDE1C  
PDE2A  
PDE3A  
PDE3B  
PDE4A  
PDE4B  
PDE4C  
PDE4D  
PDE4DIP  
PDE5A  
PDE6A  
PDE6B  
PDE6D  
PDE7A  
PDE7B  
PDE8A  
PDE8B  
PDE9A  
PDF  
PDGFA  
PDGFC  
PDGFD  
PDGFRA  
PDGFRL  
PDHA1  
PDHB  
PDHX  
PDIA3  
PDIA3P1  
PDIA4  
PDIA5  
PDIA6  
PDIK1L  
PDK1  
PDK2  
PDK3  
PDK4  
PDLIM1  
PDLIM2  
PDLIM3  
PDLIM4  
PDLIM5  
PDLIM7  
PDP1  
PDP2  
PDPK1  
PDPK2P  
PDPN  
PDPR  
PDRG1  
PDS5A  
PDS5B

PDSS1  
PDSS1P1  
PDSS2  
PDXDC1  
PDXDC2P  
PDXK  
PDXP  
PDZD11  
PDZD2  
PDZD7  
PDZD8  
PDZD9  
PDZK1  
PDZK1IP1  
PEA15  
PEAK1  
PEAK3  
PEBP1  
PECAM1  
PECR  
PEF1  
PEG10  
PELI1  
PELI2  
PELI3  
PELO  
PELP1  
PEMT  
PEPD  
PER1  
PER2  
PER3  
PERM1  
PERP  
PES1  
PET100  
PET117  
PEX1  
PEX10  
PEX11A  
PEX11B  
PEX11G  
PEX12  
PEX13  
PEX14  
PEX16  
PEX19  
PEX2  
PEX26  
PEX3  
PEX5  
PEX5L  
PEX6  
PEX7  
PFAS  
PFDN1  
PFDN2  
PFDN4

PFDN5  
PFDN6  
PFKFB2  
PFKFB3  
PFKFB4  
PFKL  
PFKM  
PFKP  
PFN1  
PFN1P2  
PFN2  
PGA4  
PGAM1  
PGAM1P5  
PGAM1P8  
PGAM5  
PGAP1  
PGAP2  
PGAP3  
PGAP4  
PGAP6  
PGBD1  
PGBD2  
PGBD4  
PGBD5  
PGD  
PGF  
PGGHG  
PGGT1B  
PGK1  
PGLS  
PGM1  
PGM2  
PGM2L1  
PGM3  
PGM5  
PGM5P2  
PGP  
PGPEP1  
PGR  
PGRMC1  
PGRMC2  
PGS1  
PHACTR1  
PHACTR2  
PHACTR3  
PHACTR4  
PHAX  
PHB  
PHB2  
PHBP12  
PHC1  
PHC1P1  
PHC2  
PHC3  
PHETA1  
PHETA2  
PHEX

PHF1  
PHF10  
PHF11  
PHF12  
PHF13  
PHF14  
PHF19  
PHF2  
PHF20  
PHF20L1  
PHF21A  
PHF23  
PHF24  
PHF3  
PHF5A  
PHF6  
PHF7  
PHF8  
PHGDH  
PHIP  
PHKA1  
PHKA1P1  
PHKA2  
PHKB  
PHKG1  
PHKG2  
PHLDA1  
PHLDA2  
PHLDA3  
PHLDB1  
PHLDB2  
PHLDB3  
PHLPP1  
PHLPP2  
PHOSPHO1  
PHOSPHO2  
PHPT1  
PHRF1  
PHTF1  
PHTF2  
PHYH  
PHYHD1  
PHYKPL  
PI3  
PI4K2A  
PI4K2B  
PI4KA  
PI4KAP1  
PI4KAP2  
PI4KB  
PIAS1  
PIAS2  
PIAS3  
PIAS4  
PIBF1  
PICALM  
PICK1  
PID1

PIDD1  
PIEZO1  
PIEZO2  
PIF1  
PIFO  
PIGA  
PIGB  
PIGBOS1  
PIGC  
PIGCP1  
PIGF  
PIGG  
PIGH  
PIGK  
PIGL  
PIGM  
PIGN  
PIGO  
PIGP  
PIGQ  
PIGR  
PIGS  
PIGT  
PIGU  
PIGV  
PIGW  
PIGX  
PIGZ  
PIH1D1  
PIH1D2  
PIH1D3  
PIK3AP1  
PIK3C2A  
PIK3C2B  
PIK3C2G  
PIK3C3  
PIK3CA  
PIK3CB  
PIK3CD  
PIK3CG  
PIK3IP1  
PIK3R1  
PIK3R2  
PIK3R3  
PIK3R4  
PIK3R5  
PIK3R6  
PIKFYVE  
PILRA  
PILRB  
PIM1  
PIM2  
PIM3  
PIN1  
PIN4  
PINK1  
PINLYP  
PINX1

PIP  
PIP4K2A  
PIP4K2B  
PIP4K2C  
PIP4P1  
PIP4P2  
PIP5K1A  
PIP5K1B  
PIP5K1C  
PIP5KL1  
PIPOX  
PIPSL  
PIR  
PISD  
PITHD1  
PITPNA  
PITPNB  
PITPNC1  
PITPNM1  
PITPNM2  
PITPNM3  
PITRM1  
PITX1  
PIWIL2  
PIWIL4  
PJA1  
PJA2  
PKD1  
PKD1L1  
PKD1L2  
PKD1L3  
PKD1P1  
PKD1P5  
PKD1P6  
PKD2  
PKD2L2  
PKDREJ  
PKHD1  
PKHD1L1  
PKIA  
PKIB  
PKIG  
PKM  
PKMYT1  
PKN1  
PKN2  
PKN3  
PKNOX1  
PKNOX2  
PKP1  
PKP2  
PKP3  
PKP4  
PLA1A  
PLA2G10  
PLA2G12A  
PLA2G15  
PLA2G2C

PLA2G4A  
PLA2G4B  
PLA2G4C  
PLA2G4D  
PLA2G4E  
PLA2G4F  
PLA2G6  
PLA2G7  
PLA2R1  
PLAA  
PLAAT2  
PLAAT3  
PLAAT4  
PLAAT5  
PLAC8  
PLAG1  
PLAGL1  
PLAGL2  
PLAT  
PLAU  
PLAUR  
PLB1  
PLBD1  
PLBD2  
PLCB1  
PLCB2  
PLCB3  
PLCB4  
PLCD1  
PLCD3  
PLCD4  
PLCE1  
PLCG1  
PLCG2  
PLCH1  
PLCH2  
PLCL1  
PLCL2  
PLCXD1  
PLCXD2  
PLCXD3  
PLD1  
PLD2  
PLD3  
PLD4  
PLD6  
PLEC  
PLEK  
PLEK2  
PLEKHA1  
PLEKHA2  
PLEKHA3  
PLEKHA4  
PLEKHA5  
PLEKHA6  
PLEKHA7  
PLEKHA8  
PLEKHA8P1



PLEKHB1  
PLEKHB2  
PLEKHD1  
PLEKHF1  
PLEKHF2  
PLEKHG1  
PLEKHG2  
PLEKHG3  
PLEKHG4  
PLEKHG4B  
PLEKHG5  
PLEKHG6  
PLEKHG7  
PLEKHH1  
PLEKHH2  
PLEKHH3  
PLEKHJ1  
PLEKHM1  
PLEKHM1P1  
PLEKHM2  
PLEKHM3  
PLEKHN1  
PLEKHO1  
PLEKHO2  
PLEKHS1  
PLG  
PLGLB1  
PLGLB2  
PLGRKT  
PLIN2  
PLIN3  
PLIN4  
PLIN5  
PLK1  
PLK2  
PLK3  
PLK4  
PLK5  
PLLP  
PLN  
PLOD1  
PLOD2  
PLOD3  
PLP2  
PLPBP  
PLPP1  
PLPP2  
PLPP3  
PLPP5  
PLPP6  
PLPPR2  
PLPPR3  
PLRG1  
PLS1  
PLS3  
PLSCR1  
PLSCR2  
PLSCR3

PLSCR4  
PLTP  
PLVAP  
PLXDC1  
PLXDC2  
PLXNA1  
PLXNA2  
PLXNA3  
PLXNA4  
PLXNB1  
PLXNB2  
PLXNB3  
PLXNC1  
PLXND1  
PM20D2  
PMAIP1  
PMEL  
PMEPA1  
PMF1  
PMFBP1  
PML  
PMM1  
PMM2  
PMP2  
PMP22  
PMPCA  
PMPCB  
PMS1  
PMS2  
PMS2CL  
PMS2P1  
PMS2P10  
PMS2P2  
PMS2P3  
PMS2P6  
PMS2P7  
PMS2P9  
PMVK  
PNISR  
PNKD  
PNKP  
PNLDC1  
PNLIPRP1  
PNMA1  
PNMA2  
PNMA8A  
PNMA8C  
PNN  
PNO1  
PNP  
PNPLA1  
PNPLA2  
PNPLA3  
PNPLA4  
PNPLA6  
PNPLA7  
PNPLA8  
PNPO

PNPT1  
PNRC1  
PNRC2  
POC1A  
POC1B  
POC1B-GALNT4  
POC5  
PODNL1  
PODXL  
PODXL2  
POF1B  
POFUT1  
POFUT2  
POGK  
POGLUT1  
POGLUT3  
POGZ  
POLA1  
POLA2  
POLB  
POLD1  
POLD2  
POLD3  
POLD4  
POLDIP2  
POLDIP3  
POLE  
POLE2  
POLE3  
POLE4  
POLG  
POLG2  
POLH  
POLI  
POLK  
POLL  
POLM  
POLN  
POLQ  
POLR1A  
POLR1B  
POLR1C  
POLR1D  
POLR1E  
POLR2A  
POLR2B  
POLR2C  
POLR2D  
POLR2E  
POLR2F  
POLR2G  
POLR2H  
POLR2I  
POLR2J  
POLR2J2  
POLR2J3  
POLR2J4  
POLR2K

POLR2L  
POLR2M  
POLR3A  
POLR3B  
POLR3C  
POLR3D  
POLR3E  
POLR3F  
POLR3G  
POLR3GL  
POLR3H  
POLR3K  
POLRMT  
POM121  
POM121B  
POM121C  
POM121L9P  
POMGNT1  
POMGNT2  
POMK  
POMP  
POMT1  
POMT2  
POMZP3  
PON2  
PON3  
POP1  
POP4  
POP5  
POP7  
POPDC2  
POR  
PORCN  
POSTN  
POT1  
POTEC  
POTEH  
POTEI  
POU2AF1  
POU2F1  
POU2F2  
POU2F3  
POU5F1  
POU5F1B  
POU5F2  
POU6F1  
POU6F2  
PP2D1  
PPA1  
PPA2  
PPAN  
PPAN-P2RY11  
PPARA  
PPARD  
PPARG  
PPARGC1A  
PPARGC1B  
PPAT

PPCDC  
PPCS  
PPDPF  
PPEF2  
PPFIA1  
PPFIBP1  
PPFIBP2  
PPHLN1  
PPIA  
PPIAL4G  
PPIAP22  
PPIAP46  
PPIAP51  
PPIB  
PPIC  
PPID  
PPIE  
PPIF  
PPIG  
PPIH  
PPIL1  
PPIL2  
PPIL3  
PPIL4  
PPIL6  
PPIP5K1  
PPIP5K2  
PPL  
PPM1A  
PPM1B  
PPM1D  
PPM1E  
PPM1F  
PPM1G  
PPM1H  
PPM1J  
PPM1K  
PPM1L  
PPM1M  
PPM1N  
PPME1  
PPOX  
PPP1CA  
PPP1CB  
PPP1CC  
PPP1R10  
PPP1R11  
PPP1R12A  
PPP1R12B  
PPP1R12C  
PPP1R13B  
PPP1R13L  
PPP1R14B  
PPP1R14C  
PPP1R15A  
PPP1R15B  
PPP1R16A  
PPP1R16B

PPP1R18  
PPP1R1B  
PPP1R1C  
PPP1R2  
PPP1R21  
PPP1R26  
PPP1R32  
PPP1R35  
PPP1R36  
PPP1R37  
PPP1R3B  
PPP1R3C  
PPP1R3D  
PPP1R3E  
PPP1R3F  
PPP1R3G  
PPP1R42  
PPP1R7  
PPP1R8  
PPP1R9A  
PPP1R9B  
PPP2CA  
PPP2CB  
PPP2R1A  
PPP2R1B  
PPP2R2A  
PPP2R2B  
PPP2R2C  
PPP2R2D  
PPP2R3A  
PPP2R3B  
PPP2R3C  
PPP2R5A  
PPP2R5B  
PPP2R5C  
PPP2R5D  
PPP2R5E  
PPP3CA  
PPP3CB  
PPP3CC  
PPP3R1  
PPP4C  
PPP4R1  
PPP4R1L  
PPP4R2  
PPP4R3A  
PPP4R3B  
PPP4R4  
PPP5C  
PPP5D1  
PPP6C  
PPP6R1  
PPP6R2  
PPP6R3  
PPRC1  
PPT1  
PPT2  
PPTC7

PPWD1  
PQBP1  
PRADC1  
PRAF2  
PRAG1  
PRAM1  
PRB3  
PRB4  
PRC1  
PRCC  
PRCP  
PRDM1  
PRDM10  
PRDM11  
PRDM15  
PRDM2  
PRDM4  
PRDM5  
PRDM6  
PRDM7  
PRDM8  
PRDX1  
PRDX2  
PRDX3  
PRDX3P1  
PRDX4  
PRDX5  
PRDX6  
PREB  
PRELID1  
PRELID1P1  
PRELID2  
PRELID3B  
PRELP  
PREP  
PREPL  
PREX1  
PREX2  
PRF1  
PRICKLE1  
PRICKLE2  
PRICKLE3  
PRIM1  
PRIM2  
PRIMPOL  
PRKAA1  
PRKAA2  
PRKAB1  
PRKAB2  
PRKACA  
PRKACB  
PRKAG1  
PRKAG2  
PRKAR1A  
PRKAR1B  
PRKAR2A  
PRKAR2B  
PRKCA

PRKCB  
PRKCD  
PRKCE  
PRKCH  
PRKCI  
PRKCQ  
PRKCSH  
PRKCZ  
PRKD2  
PRKD3  
PRKDC  
PRKG2  
PRKN  
PRKRA  
PRKRIP1  
PRKX  
PRKXP1  
PRKY  
PRLHR  
PRLR  
PRMT1  
PRMT2  
PRMT3  
PRMT5  
PRMT6  
PRMT7  
PRMT8  
PRMT9  
PRND  
PRNP  
PROB1  
PROC  
PROCA1  
PROCR  
PRODH  
PROK2  
PROM1  
PROM2  
PRORP  
PRORS1P  
PROS1  
PROSER1  
PROSER2  
PROSER3  
PROX1  
PROX2  
PRPF18  
PRPF19  
PRPF3  
PRPF31  
PRPF38A  
PRPF38B  
PRPF39  
PRPF4  
PRPF40A  
PRPF40B  
PRPF4B  
PRPF6



PRPF8  
PRPH  
PRPS1  
PRPS1P2  
PRPS2  
PRPSAP1  
PRPSAP2  
PRR11  
PRR12  
PRR13  
PRR14  
PRR14L  
PRR15  
PRR15L  
PRR18  
PRR19  
PRR26  
PRR27  
PRR29  
PRR3  
PRR4  
PRR5  
PRR5L  
PRR7  
PRRC1  
PRRC2A  
PRRC2B  
PRRC2C  
PRRG1  
PRRG2  
PRRG3  
PRRG4  
PRRT2  
PRRT3  
PRRX1  
PRSS12  
PRSS16  
PRSS22  
PRSS23  
PRSS27  
PRSS53  
PRSS54  
PRSS8  
PRTG  
PRUNE1  
PRUNE2  
PRX  
PRXL2A  
PRXL2B  
PRXL2C  
PSAP  
PSAT1  
PSCA  
PSD  
PSD3  
PSD4  
PSEN1  
PSEN2

PSENEN  
PSG2  
PSIP1  
PSKH1  
PSMA1  
PSMA2  
PSMA3  
PSMA4  
PSMA5  
PSMA6  
PSMA7  
PSMB1  
PSMB10  
PSMB2  
PSMB3  
PSMB4  
PSMB5  
PSMB6  
PSMB7  
PSMB8  
PSMB9  
PSMC1  
PSMC1P1  
PSMC2  
PSMC3  
PSMC3IP  
PSMC4  
PSMC5  
PSMC6  
PSMD1  
PSMD10  
PSMD10P1  
PSMD11  
PSMD12  
PSMD13  
PSMD14  
PSMD2  
PSMD3  
PSMD4  
PSMD5  
PSMD6  
PSMD7  
PSMD8  
PSMD9  
PSME1  
PSME2  
PSME3  
PSME3IP1  
PSME4  
PSMF1  
PSMG1  
PSMG2  
PSMG3  
PSMG4  
PSPC1  
PSPH  
PSPN  
PSTK

PSTPIP1  
PSTPIP2  
PTAFR  
PTAR1  
PTBP1  
PTBP2  
PTBP3  
PTCD1  
PTCD2  
PTCD3  
PTCH1  
PTCH2  
PTCHD1  
PTCHD4  
PTDSS1  
PTDSS2  
PTEN  
PTENP1  
PTER  
PTGDR  
PTGDS  
PTGER2  
PTGER3  
PTGER4  
PTGES  
PTGES2  
PTGES3  
PTGES3L  
PTGFR  
PTGFRN  
PTGIR  
PTGIS  
PTGR1  
PTGR2  
PTGS1  
PTGS2  
PTK2  
PTK2B  
PTK6  
PTK7  
PTMA  
PTMS  
PTN  
PTOV1  
PTP4A1  
PTP4A2  
PTP4A3  
PTPA  
PTPDC1  
PTPMT1  
PTPN1  
PTPN11  
PTPN12  
PTPN13  
PTPN14  
PTPN18  
PTPN2  
PTPN20

PTPN21  
PTPN22  
PTPN23  
PTPN3  
PTPN4  
PTPN6  
PTPN7  
PTPN9  
PTPRA  
PTPRB  
PTPRC  
PTPRCAP  
PTPRD  
PTPRE  
PTPRF  
PTPRG  
PTPRH  
PTPRJ  
PTPRK  
PTPRM  
PTPRN2  
PTPRO  
PTPRQ  
PTPRS  
PTPRT  
PTPRU  
PTPRVP  
PTPRZ1  
PTRH1  
PTRH2  
PTRHD1  
PTS  
PTTG1  
PTTG1IP  
PTX3  
PUDP  
PUF60  
PUM1  
PUM2  
PUM3  
PURA  
PURB  
PUS1  
PUS10  
PUS3  
PUS7  
PUS7L  
PUSL1  
PVR  
PVRIG  
PVRIG2P  
PWP1  
PWP2  
PWWP2A  
PWWP2B  
PWWP3A  
PXDC1  
PXDN

PXK  
PXMP2  
PXMP4  
PXN  
PXYLP1  
PYCARD  
PYCR1  
PYCR2  
PYCR3  
PYGB  
PYGL  
PYGM  
PYGO1  
PYGO2  
PYHIN1  
PYM1  
PYROXD1  
PYROXD2  
PYURF  
PZP  
QARS1  
QDPR  
QKI  
QPCT  
QPCTL  
QPRT  
QRICH1  
QRICH2  
QRS11  
QRS11P3  
QSER1  
QSOX1  
QSOX2  
QTRT1  
QTRT2  
R3HCC1  
R3HCC1L  
R3HDM1  
R3HDM2  
R3HDM4  
RAB10  
RAB11A  
RAB11B  
RAB11FIP1  
RAB11FIP1P1  
RAB11FIP2  
RAB11FIP3  
RAB11FIP4  
RAB11FIP5  
RAB12  
RAB13  
RAB14  
RAB15  
RAB17  
RAB18  
RAB19  
RAB1A  
RAB1B

RAB20  
RAB21  
RAB22A  
RAB23  
RAB24  
RAB25  
RAB26  
RAB27A  
RAB27B  
RAB28  
RAB29  
RAB2A  
RAB2B  
RAB30  
RAB31  
RAB32  
RAB33B  
RAB34  
RAB35  
RAB36  
RAB37  
RAB38  
RAB39A  
RAB39B  
RAB3B  
RAB3D  
RAB3GAP1  
RAB3GAP2  
RAB3IP  
RAB40A  
RAB40B  
RAB40C  
RAB42  
RAB43  
RAB44  
RAB4A  
RAB4B  
RAB4B-EGLN2  
RAB5A  
RAB5B  
RAB5C  
RAB5IF  
RAB6A  
RAB6B  
RAB7A  
RAB8A  
RAB8B  
RAB9A  
RABAC1  
RABEP1  
RABEP2  
RABEPK  
RABGAP1  
RABGAP1L  
RABGEF1  
RABGGTA  
RABGGTB  
RABIF

RABL2A  
RABL2B  
RABL3  
RABL6  
RAC1  
RAC1P2  
RAC2  
RACGAP1  
RACK1  
RAD1  
RAD17  
RAD17P2  
RAD18  
RAD21  
RAD23A  
RAD23B  
RAD50  
RAD51  
RAD51AP1  
RAD51B  
RAD51C  
RAD51D  
RAD52  
RAD54B  
RAD54L  
RAD54L2  
RAD9A  
RAD9B  
RADIL  
RADX  
RAE1  
RAET1E  
RAET1G  
RAF1  
RAG1  
RAI1  
RAI14  
RAI2  
RALA  
RALB  
RALBP1  
RALGAPA1  
RALGAPA1P1  
RALGAPA2  
RALGAPB  
RALGDS  
RALGPS1  
RALGPS2  
RALY  
RAMAC  
RAMP1  
RAN  
RANBP1  
RANBP10  
RANBP17  
RANBP2  
RANBP3  
RANBP6

RANBP9  
RANGAP1  
RANGRF  
RAP1A  
RAP1B  
RAP1GAP  
RAP1GAP2  
RAP1GDS1  
RAP2A  
RAP2B  
RAP2C  
RAPGEF1  
RAPGEF2  
RAPGEF3  
RAPGEF4  
RAPGEF5  
RAPGEF6  
RAPGEFL1  
RAPH1  
RARA  
RARB  
RARG  
RARRES1  
RARRES2  
RARS1  
RARS2  
RASA1  
RASA2  
RASA3  
RASA4  
RASA4B  
RASA4CP  
RASAL1  
RASAL2  
RASAL3  
RASD1  
RASEF  
RASGEF1A  
RASGEF1B  
RASGRF1  
RASGRF2  
RASGRP1  
RASGRP2  
RASGRP3  
RASGRP4  
RASIP1  
RASL10B  
RASL11A  
RASSF1  
RASSF10  
RASSF2  
RASSF3  
RASSF4  
RASSF5  
RASSF6  
RASSF7  
RASSF8  
RASSF9



RAVER1  
RAVER2  
RB1  
RB1CC1  
RBAK  
RBBP4  
RBBP5  
RBBP6  
RBBP7  
RBBP8  
RBBP8NL  
RBBP9  
RBCK1  
RBFA  
RBFOX2  
RBFOX3  
RBIS  
RBKS  
RBL1  
RBL2  
RBM10  
RBM11  
RBM12  
RBM12B  
RBM14  
RBM14-RBM4  
RBM15  
RBM15B  
RBM17  
RBM18  
RBM19  
RBM20  
RBM22  
RBM22P2  
RBM23  
RBM24  
RBM25  
RBM26  
RBM27  
RBM28  
RBM3  
RBM33  
RBM34  
RBM38  
RBM39  
RBM4  
RBM41  
RBM42  
RBM43  
RBM44  
RBM45  
RBM47  
RBM48  
RBM4B  
RBM5  
RBM6  
RBM7  
RBM8A

RBMS1  
RBMS1P1  
RBMS2  
RBMS2P1  
RBMS3  
RBMX  
RBMX2  
RBMXL1  
RBP1  
RBPJ  
RBPMS  
RBSN  
RBX1  
RC3H1  
RC3H2  
RCAN1  
RCAN2  
RCAN3  
RCBTB1  
RCBTB2  
RCC1  
RCC1L  
RCC2  
RCCD1  
RCE1  
RCHY1  
RCL1  
RCN1  
RCN1P2  
RCN2  
RCOR1  
RCOR3  
RCSD1  
RCVRN  
RD3  
RDH10  
RDH11  
RDH13  
RDH14  
RDH16  
RDH5  
RDM1P5  
RDX  
REC8  
RECK  
RECQL  
RECQL4  
RECQL5  
REEP1  
REEP2  
REEP3  
REEP4  
REEP5  
REEP6  
REL  
RELA  
RELB  
RELCH

RELL1  
RELL2  
RELN  
RELT  
REM1  
REM2  
RENB  
REPIN1  
REPS1  
REPS2  
RER1  
RERE  
RERG  
RESF1  
REST  
RET  
RETREG1  
RETREG2  
RETREG3  
RETSAT  
REV1  
REV3L  
REX1BD  
REXO1  
REXO1L1P  
REXO2  
REXO4  
REXO5  
RFC1  
RFC2  
RFC3  
RFC4  
RFC5  
RFFL  
RFK  
RFLNB  
RFNG  
RFT1  
RFTN1  
RFTN2  
RFWD3  
RFX1  
RFX2  
RFX3  
RFX5  
RFX7  
RFXANK  
RFXAP  
RGCC  
RGL1  
RGL2  
RGL3  
RGL4  
RGMA  
RGMB  
RGP1  
RGPD1  
RGPD2

RGPD3  
RGPD5  
RGPD6  
RGPD8  
RGR  
RGS1  
RGS10  
RGS12  
RGS13  
RGS14  
RGS17  
RGS18  
RGS19  
RGS2  
RGS22  
RGS3  
RGS4  
RGS5  
RGS7BP  
RGS9  
RGS1  
RHBDD1  
RHBDD2  
RHBDD3  
RHBDF1  
RHBDF2  
RHBDL2  
RHBG  
RHCG  
RHD  
RHEB  
RHEBL1  
RHEX  
RHNO1  
RHOA  
RHOB  
RHOBTB1  
RHOBTB2  
RHOBTB3  
RHOC  
RHOD  
RHOF  
RHOG  
RHOH  
RHOJ  
RHOQ  
RHOT1  
RHOT2  
RHOU  
RHOV  
RHOXF2B  
RHPN1  
RHPN2  
RIBC1  
RIBC2  
RIC1  
RIC3  
RIC8A

RIC8B  
RICTOR  
RIDA  
RIF1  
RIIAD1  
RILP  
RILPL1  
RILPL2  
RIMBP3  
RIMBP3C  
RIMKLA  
RIMKLB  
RIMKLBP1  
RIMS1  
RIMS2  
RIMS3  
RIN1  
RIN2  
RIN3  
RING1  
RINL  
RINT1  
RIOK1  
RIOK2  
RIOK3  
RIOX1  
RIOX2  
RIPK1  
RIPK2  
RIPK3  
RIPK4  
RIPOR1  
RIPOR2  
RIPOR3  
RIPPLY3  
RIT1  
RITA1  
RLF  
RLIM  
RLIMP1  
RMC1  
RMDN1  
RMDN2  
RMDN3  
RMI1  
RMI2  
RMND1  
RMND5A  
RMND5B  
RNASE1  
RNASE10  
RNASE4  
RNASE6  
RNASE7  
RNASEH1  
RNASEH2A  
RNASEH2B  
RNASEH2C

RNASEK  
RNASEK-C17orf49  
RNASEL  
RNASET2  
RND1  
RND2  
RND3  
RNF10  
RNF103  
RNF103-CHMP3  
RNF11  
RNF111  
RNF113A  
RNF114  
RNF115  
RNF121  
RNF122  
RNF123  
RNF125  
RNF126  
RNF13  
RNF130  
RNF135  
RNF138  
RNF139  
RNF14  
RNF141  
RNF144A  
RNF144B  
RNF145  
RNF146  
RNF149  
RNF150  
RNF152  
RNF157  
RNF165  
RNF166  
RNF167  
RNF168  
RNF169  
RNF170  
RNF175  
RNF180  
RNF181  
RNF183  
RNF185  
RNF187  
RNF19A  
RNF19B  
RNF2  
RNF20  
RNF207  
RNF212  
RNF213  
RNF214  
RNF215  
RNF216  
RNF216P1

RNF217  
RNF220  
RNF222  
RNF223  
RNF227  
RNF24  
RNF25  
RNF26  
RNF31  
RNF32  
RNF34  
RNF38  
RNF39  
RNF4  
RNF40  
RNF41  
RNF43  
RNF44  
RNF5  
RNF6  
RNF7  
RNF8  
RNFT1  
RNFT2  
RNGTT  
RNH1  
RNLS  
RNMT  
RNPC3  
RNPEP  
RNPEPL1  
RNPS1  
RO60  
ROBO1  
ROBO2  
ROCK1  
ROCK1P1  
ROCK2  
ROGDI  
ROMO1  
ROPN1B  
ROPN1L  
ROR1  
RORA  
RORB  
RORC  
RP1  
RP1L1  
RP2  
RP9  
RP9P  
RPA1  
RPA2  
RPA3  
RPAIN  
RPAP1  
RPAP2  
RPAP3

RPE  
RPF1  
RPF2  
RPGR  
RPGRIP1  
RPGRIP1L  
RPH3A  
RPH3AL  
RPIA  
RPL10  
RPL10A  
RPL10P9  
RPL11  
RPL11P3  
RPL12  
RPL12P38  
RPL13  
RPL13A  
RPL13AP5  
RPL13P12  
RPL13P5  
RPL14  
RPL15  
RPL17  
RPL17-C18orf32  
RPL18  
RPL18A  
RPL18AP3  
RPL19  
RPL21  
RPL21P119  
RPL21P16  
RPL22  
RPL22L1  
RPL22P1  
RPL23  
RPL23A  
RPL23AP1  
RPL23AP35  
RPL23AP53  
RPL23AP7  
RPL23AP82  
RPL24  
RPL26  
RPL26L1  
RPL26P30  
RPL27  
RPL27A  
RPL28  
RPL29  
RPL3  
RPL30  
RPL31  
RPL32  
RPL32P3  
RPL34  
RPL35  
RPL35A



RPL36  
RPL36A  
RPL36A-HNRNPH2  
RPL36AL  
RPL37  
RPL37A  
RPL38  
RPL39  
RPL39L  
RPL3L  
RPL3P4  
RPL3P6  
RPL4  
RPL41  
RPL41P2  
RPL4P7  
RPL5  
RPL5P30  
RPL5P34  
RPL5P4  
RPL6  
RPL6P27  
RPL7  
RPL7A  
RPL7L1  
RPL7P1  
RPL7P18  
RPL7P19  
RPL7P41  
RPL7P9  
RPL8  
RPL9  
RPLP0  
RPLP0P2  
RPLP1  
RPLP2  
RPN1  
RPN2  
RPP14  
RPP21  
RPP25  
RPP25L  
RPP30  
RPP38  
RPRD1A  
RPRD1B  
RPRD2  
RPRM  
RPS10  
RPS10-NUDT3  
RPS10P7  
RPS11  
RPS12  
RPS13  
RPS14  
RPS15  
RPS15A  
RPS16

RPS17  
RPS18  
RPS19  
RPS19BP1  
RPS2  
RPS20  
RPS20P22  
RPS21  
RPS23  
RPS24  
RPS25  
RPS26  
RPS27  
RPS27A  
RPS27L  
RPS28  
RPS29  
RPS2P36  
RPS2P5  
RPS3  
RPS3A  
RPS3AP16  
RPS3AP34  
RPS4X  
RPS4XP5  
RPS4XP6  
RPS4Y1  
RPS5  
RPS6  
RPS6KA1  
RPS6KA2  
RPS6KA3  
RPS6KA4  
RPS6KA5  
RPS6KA6  
RPS6KB1  
RPS6KB2  
RPS6KC1  
RPS6KL1  
RPS6P20  
RPS7  
RPS8  
RPS9  
RPSA  
RPSAP58  
RPTN  
RPTOR  
RPUUSD1  
RPUUSD2  
RPUUSD3  
RPUUSD4  
RRAD  
RRAGA  
RRAGB  
RRAGC  
RRAGD  
RRAS  
RRAS2

RRBP1  
RREB1  
RRM1  
RRM2  
RRM2B  
RRM2P3  
RRN3  
RRN3P1  
RRN3P2  
RRN3P3  
RRN3P4  
RRNAD1  
RRP1  
RRP12  
RRP15  
RRP1B  
RRP36  
RRP7A  
RRP7BP  
RRP8  
RRP9  
RRS1  
RSAD1  
RSAD2  
RSBN1  
RSBN1L  
RSC1A1  
RSF1  
RSKR  
RSL1D1  
RSL24D1  
RSPH1  
RSPH10B  
RSPH10B2  
RSPH14  
RSPH3  
RSPH4A  
RSPH9  
RSPRY1  
RSRC1  
RSRC2  
RSRP1  
RSU1  
RTCA  
RTCB  
RTEL1  
RTEL1-TNFRSF6B  
RTEL1P1  
RTF1  
RTF2  
RTKN  
RTKN2  
RTL10  
RTL5  
RTL6  
RTL8A  
RTL8B  
RTL8C

RTN1  
RTN2  
RTN3  
RTN4  
RTN4IP1  
RTN4RL1  
RTP4  
RTRAF  
RTTN  
RUBCN  
RUBCNL  
RUFY1  
RUFY2  
RUFY3  
RUFY4  
RUNDC1  
RUNDC3A  
RUNX1  
RUNX1T1  
RUNX2  
RUNX3  
RUSC1  
RUSC2  
RUVBL1  
RUVBL2  
RWDD1  
RWDD2A  
RWDD2B  
RWDD3  
RWDD4  
RXRA  
RXRB  
RXYLT1  
RYBP  
RYK  
RYR1  
RYR2  
RYR3  
S100A10  
S100A11  
S100A12  
S100A13  
S100A14  
S100A16  
S100A2  
S100A4  
S100A6  
S100A7  
S100A8  
S100A9  
S100B  
S100P  
S100PBP  
S1PR3  
S1PR4  
SAA1  
SAA2  
SAA2-SAA4

SAA4  
SAAL1  
SACM1L  
SACS  
SAE1  
SAFB  
SAFB2  
SAG  
SALL2  
SALL4  
SALL4P7  
SAMD1  
SAMD10  
SAMD12  
SAMD14  
SAMD15  
SAMD3  
SAMD4A  
SAMD4B  
SAMD5  
SAMD8  
SAMD9  
SAMD9L  
SAMHD1  
SAMM50  
SAMSN1  
SAP130  
SAP18  
SAP25  
SAP30  
SAP30BP  
SAP30L  
SAPCD1  
SAPCD2  
SAR1A  
SAR1B  
SARAF  
SARDH  
SARM1  
SARNP  
SARS1  
SARS2  
SART1  
SART3  
SASH1  
SASH3  
SASS6  
SAT1  
SAT2  
SATB1  
SATB2  
SAV1  
SAXO2  
SAYSD1  
SBDS  
SBDSP1  
SBF1  
SBF2

SBK1  
SBNO1  
SBNO2  
SBSPON  
SC5D  
SCAF1  
SCAF11  
SCAF4  
SCAF8  
SCAI  
SCAMP1  
SCAMP2  
SCAMP3  
SCAMP4  
SCAMP5  
SCAND1  
SCAND2P  
SCAP  
SCAPER  
SCARA3  
SCARB1  
SCARB2  
SCARF1  
SCARF2  
SCART1  
SCCPDH  
SCD  
SCD5  
SCEL  
SCFD1  
SCFD2  
SCG3  
SCGB1A1  
SCGB2A1  
SCGB2B2  
SCGB3A1  
SCGB3A2  
SCHIP1  
SCIMP  
SCIN  
SCLT1  
SCLY  
SCMH1  
SCML1  
SCML2  
SCML4  
SCN11A  
SCN1A  
SCN1B  
SCN2A  
SCN2B  
SCN3A  
SCN3B  
SCN4B  
SCN7A  
SCN8A  
SCN9A  
SCNM1

SCNN1A  
SCNN1B  
SCNN1D  
SCNN1G  
SCO1  
SCOC  
SCP2  
SCPEP1  
SCRG1  
SCRIB  
SCRN1  
SCRN2  
SCRN3  
SCUBE1  
SCUBE2  
SCUBE3  
SCYL1  
SCYL2  
SCYL2P1  
SCYL3  
SDAD1  
SDAD1P1  
SDC1  
SDC2  
SDC3  
SDC4  
SDCBP  
SDCBP2  
SDCBPP1  
SDCCAG8  
SDE2  
SDF2  
SDF2L1  
SDF4  
SDHA  
SDHAF1  
SDHAF2  
SDHAF3  
SDHAF4  
SDHAP1  
SDHAP2  
SDHB  
SDHC  
SDHD  
SDK1  
SDK2  
SDR16C5  
SDR39U1  
SDR42E1  
SDS  
SDSL  
SEC11A  
SEC11C  
SEC13  
SEC14L1  
SEC14L1P1  
SEC14L2  
SEC14L3

SEC14L4  
SEC14L5  
SEC14L6  
SEC16A  
SEC16B  
SEC22A  
SEC22B  
SEC22B2P  
SEC22C  
SEC23A  
SEC23B  
SEC23IP  
SEC24A  
SEC24B  
SEC24C  
SEC24D  
SEC31A  
SEC31B  
SEC61A1  
SEC61A2  
SEC61B  
SEC61G  
SEC62  
SEC63  
SEC63P1  
SECISBP2  
SECISBP2L  
SECTM1  
SEH1L  
SEL1L  
SEL1L3  
SELENBP1  
SELENOF  
SELENOH  
SELENOI  
SELENOK  
SELENOM  
SELENON  
SELENOO  
SELENOP  
SELENOS  
SELENOT  
SELENOW  
SELL  
SELP  
SELPLG  
SEM1  
SEMA3A  
SEMA3B  
SEMA3C  
SEMA3D  
SEMA3E  
SEMA3F  
SEMA4A  
SEMA4B  
SEMA4C  
SEMA4D  
SEMA4F



SEMA4G  
SEMA5A  
SEMA6A  
SEMA6B  
SEMA6C  
SEMA6D  
SEMA7A  
SEMG2  
SENP1  
SENP2  
SENP3  
SENP3-EIF4A1  
SENP5  
SENP6  
SENP7  
SENP8  
SEPHS1  
SEPHS2  
SEPSECS  
SEPTIN1  
SEPTIN10  
SEPTIN11  
SEPTIN14  
SEPTIN14P21  
SEPTIN2  
SEPTIN3  
SEPTIN4  
SEPTIN5  
SEPTIN6  
SEPTIN7  
SEPTIN7P2  
SEPTIN7P6  
SEPTIN8  
SEPTIN9  
SERAC1  
SERBP1  
SERF1A  
SERF1B  
SERF2  
SERGEF  
SERHL2  
SERINC1  
SERINC2  
SERINC3  
SERINC4  
SERINC5  
SERP1  
SERPINA1  
SERPINA10  
SERPINA2  
SERPINA3  
SERPINA9  
SERPINB1  
SERPINB10  
SERPINB11  
SERPINB13  
SERPINB2  
SERPINB3

SERPINB4  
SERPINB5  
SERPINB6  
SERPINB7  
SERPINB8  
SERPINB9  
SERPINE1  
SERPINE2  
SERPINF1  
SERPING1  
SERPINH1  
SERPINI2  
SERTAD1  
SERTAD2  
SERTAD3  
SERTAD4  
SESN1  
SESN2  
SESN3  
SESTD1  
SET  
SETBP1  
SETD1A  
SETD1B  
SETD2  
SETD3  
SETD4  
SETD5  
SETD6  
SETD7  
SETD9  
SETDB1  
SETDB2  
SETMAR  
SETX  
SEZ6  
SEZ6L2  
SF1  
SF3A1  
SF3A2  
SF3A3  
SF3B1  
SF3B2  
SF3B3  
SF3B4  
SF3B5  
SF3B6  
SFI1  
SFMBT1  
SFMBT2  
SFN  
SFPQ  
SFR1  
SFSWAP  
SFT2D1  
SFT2D2  
SFT2D3  
SFTPB

SFXN1  
SFXN2  
SFXN3  
SFXN4  
SFXN5  
SGCB  
SGCD  
SGF29  
SGIP1  
SGK1  
SGK3  
SGMS1  
SGMS2  
SGO1  
SGO2  
SGPL1  
SGPP1  
SGPP2  
SGSH  
SGSM1  
SGSM2  
SGSM3  
SGTA  
SGTB  
SH2B1  
SH2B2  
SH2B3  
SH2D1A  
SH2D1B  
SH2D2A  
SH2D3A  
SH2D3C  
SH2D4A  
SH2D6  
SH3BGR  
SH3BGRL  
SH3BGRL2  
SH3BGRL3  
SH3BP1  
SH3BP2  
SH3BP4  
SH3BP5  
SH3BP5L  
SH3D19  
SH3D21  
SH3GL1  
SH3GL1P1  
SH3GLB1  
SH3GLB2  
SH3KBP1  
SH3PXD2A  
SH3PXD2B  
SH3RF1  
SH3RF2  
SH3RF3  
SH3TC1  
SH3TC2  
SH3YL1

SHANK1  
SHANK2  
SHANK3  
SHARPIN  
SHB  
SHC1  
SHC3  
SHC4  
SHCBP1  
SHE  
SHF  
SHFL  
SHH  
SHISA2  
SHISA5  
SHISA6  
SHISA9  
SHISAL2A  
SHKBP1  
SHLD1  
SHLD2  
SHLD2P1  
SHLD2P2  
SHLD2P3  
SHLD3  
SHMT1  
SHMT2  
SHOC1  
SHOC2  
SHOX  
SHPK  
SHPRH  
SHQ1  
SHQ1P1  
SHROOM1  
SHROOM2  
SHROOM3  
SHROOM4  
SHTN1  
SIAE  
SIAH1  
SIAH2  
SIAH3  
SIDT1  
SIDT2  
SIGIRR  
SIGLEC1  
SIGLEC10  
SIGLEC11  
SIGLEC14  
SIGLEC15  
SIGLEC5  
SIGLEC6  
SIGLEC7  
SIGLEC8  
SIGLEC9  
SIGMAR1  
SIK1

SIK1B  
SIK2  
SIK3  
SIKE1  
SIL1  
SIM1  
SIM2  
SIMC1  
SIN3A  
SIN3B  
SINHCAF  
SIPA1  
SIPA1L1  
SIPA1L2  
SIPA1L3  
SIRPA  
SIRPB1  
SIRPB2  
SIRPG  
SIRT1  
SIRT2  
SIRT3  
SIRT5  
SIRT6  
SIRT7  
SIT1  
SIVA1  
SIX1  
SIX2  
SIX3  
SIX4  
SIX5  
SKA1  
SKA2  
SKA3  
SKAP1  
SKAP2  
SKI  
SKIDA1  
SKIL  
SKINT1L  
SKIV2L  
SKP1  
SKP2  
SLA  
SLA2  
SLAIN1  
SLAIN2  
SLAMF1  
SLAMF6  
SLAMF7  
SLAMF8  
SLBP  
SLC10A1  
SLC10A3  
SLC10A5  
SLC10A7  
SLC11A1

SLC11A2  
SLC12A1  
SLC12A2  
SLC12A3  
SLC12A4  
SLC12A6  
SLC12A7  
SLC12A8  
SLC12A9  
SLC13A2  
SLC13A3  
SLC13A4  
SLC13A5  
SLC14A1  
SLC14A2  
SLC15A1  
SLC15A2  
SLC15A3  
SLC15A4  
SLC16A1  
SLC16A10  
SLC16A12  
SLC16A13  
SLC16A14  
SLC16A2  
SLC16A3  
SLC16A4  
SLC16A5  
SLC16A6  
SLC16A6P1  
SLC16A7  
SLC16A9  
SLC17A5  
SLC17A7  
SLC17A9  
SLC18A1  
SLC18B1  
SLC19A1  
SLC19A2  
SLC19A3  
SLC1A1  
SLC1A2  
SLC1A3  
SLC1A4  
SLC1A5  
SLC1A6  
SLC20A1  
SLC20A2  
SLC22A1  
SLC22A15  
SLC22A16  
SLC22A18  
SLC22A20P  
SLC22A23  
SLC22A25  
SLC22A4  
SLC22A5  
SLC22A9

SLC23A1  
SLC23A2  
SLC24A1  
SLC24A2  
SLC24A3  
SLC24A4  
SLC25A1  
SLC25A10  
SLC25A11  
SLC25A12  
SLC25A13  
SLC25A14  
SLC25A15  
SLC25A16  
SLC25A17  
SLC25A19  
SLC25A20  
SLC25A21  
SLC25A22  
SLC25A23  
SLC25A24  
SLC25A25  
SLC25A26  
SLC25A27  
SLC25A28  
SLC25A29  
SLC25A3  
SLC25A30  
SLC25A32  
SLC25A33  
SLC25A34  
SLC25A35  
SLC25A36  
SLC25A37  
SLC25A39  
SLC25A4  
SLC25A40  
SLC25A42  
SLC25A43  
SLC25A44  
SLC25A45  
SLC25A46  
SLC25A5  
SLC25A51  
SLC25A51P4  
SLC25A53  
SLC25A6  
SLC26A1  
SLC26A11  
SLC26A2  
SLC26A4  
SLC26A6  
SLC26A7  
SLC26A8  
SLC27A1  
SLC27A2  
SLC27A3  
SLC27A4

SLC27A5  
SLC28A2  
SLC28A3  
SLC29A1  
SLC29A2  
SLC29A4  
SLC2A1  
SLC2A10  
SLC2A11  
SLC2A12  
SLC2A13  
SLC2A14  
SLC2A3  
SLC2A3P1  
SLC2A3P4  
SLC2A4  
SLC2A4RG  
SLC2A5  
SLC2A6  
SLC2A8  
SLC2A9  
SLC30A1  
SLC30A2  
SLC30A3  
SLC30A4  
SLC30A5  
SLC30A6  
SLC30A7  
SLC30A8  
SLC30A9  
SLC31A1  
SLC31A2  
SLC33A1  
SLC34A2  
SLC35A1  
SLC35A2  
SLC35A3  
SLC35A4  
SLC35A5  
SLC35B1  
SLC35B2  
SLC35B4  
SLC35C1  
SLC35C2  
SLC35D1  
SLC35D2  
SLC35E1  
SLC35E2A  
SLC35E2B  
SLC35E3  
SLC35E4  
SLC35F2  
SLC35F4  
SLC35F5  
SLC35F6  
SLC35G1  
SLC35G2  
SLC35G5



SLC36A1  
SLC36A2  
SLC36A3  
SLC36A4  
SLC37A1  
SLC37A2  
SLC37A3  
SLC37A4  
SLC38A1  
SLC38A10  
SLC38A2  
SLC38A4  
SLC38A5  
SLC38A6  
SLC38A7  
SLC38A9  
SLC39A1  
SLC39A10  
SLC39A11  
SLC39A13  
SLC39A14  
SLC39A3  
SLC39A4  
SLC39A6  
SLC39A7  
SLC39A8  
SLC39A9  
SLC3A1  
SLC3A2  
SLC40A1  
SLC41A1  
SLC41A2  
SLC41A3  
SLC43A2  
SLC43A3  
SLC44A1  
SLC44A2  
SLC44A3  
SLC44A3-AS1  
SLC44A4  
SLC44A5  
SLC45A3  
SLC45A4  
SLC46A1  
SLC46A3  
SLC47A1  
SLC47A2  
SLC48A1  
SLC49A3  
SLC49A4  
SLC4A1  
SLC4A10  
SLC4A11  
SLC4A1AP  
SLC4A2  
SLC4A4  
SLC4A5  
SLC4A7

SLC4A8  
SLC50A1  
SLC51A  
SLC51B  
SLC52A1  
SLC52A2  
SLC52A3  
SLC5A1  
SLC5A12  
SLC5A2  
SLC5A3  
SLC5A5  
SLC5A6  
SLC5A8  
SLC5A9  
SLC66A1  
SLC66A2  
SLC66A3  
SLC6A1  
SLC6A13  
SLC6A14  
SLC6A16  
SLC6A17  
SLC6A20  
SLC6A6  
SLC6A8  
SLC6A9  
SLC7A1  
SLC7A11  
SLC7A14  
SLC7A2  
SLC7A4  
SLC7A5  
SLC7A6  
SLC7A6OS  
SLC7A7  
SLC7A8  
SLC7A9  
SLC8A1  
SLC8A2  
SLC8B1  
SLC9A1  
SLC9A2  
SLC9A3  
SLC9A3R1  
SLC9A3R2  
SLC9A4  
SLC9A5  
SLC9A6  
SLC9A7  
SLC9A8  
SLC9A9  
SLC9B1  
SLC9B2  
SLC9C1  
SLC9C2  
SLCO1A2  
SLCO1B3

SLCO2A1  
SLCO2B1  
SLCO3A1  
SLCO4A1  
SLCO4C1  
SLCO5A1  
SLF1  
SLF2  
SLFN11  
SLFN12  
SLFN12L  
SLFN13  
SLFN5  
SLIRP  
SLIT1  
SLIT2  
SLIT3  
SLITRK2  
SLITRK4  
SLITRK5  
SLK  
SLMAP  
SLPI  
SLTM  
SLU7  
SLX1A  
SLX1B  
SLX4  
SLX4IP  
SMAD1  
SMAD2  
SMAD3  
SMAD4  
SMAD5  
SMAD7  
SMAD9  
SMAGP  
SMAP1  
SMAP2  
SMARCA1  
SMARCA2  
SMARCA4  
SMARCA5  
SMARCAD1  
SMARCAL1  
SMARCB1  
SMARCC1  
SMARCC2  
SMARCD1  
SMARCD2  
SMARCD3  
SMARCE1  
SMBD1P  
SMC1A  
SMC2  
SMC3  
SMC3P1  
SMC4

SMC5  
SMC6  
SMCHD1  
SMCO4  
SMCR8  
SMDT1  
SMG1  
SMG1P1  
SMG1P2  
SMG1P3  
SMG1P4  
SMG1P5  
SMG1P6  
SMG1P7  
SMG5  
SMG6  
SMG7  
SMG8  
SMG9  
SMIM10L1  
SMIM11A  
SMIM11B  
SMIM12  
SMIM13  
SMIM14  
SMIM15  
SMIM17  
SMIM19  
SMIM20  
SMIM22  
SMIM26  
SMIM27  
SMIM29  
SMIM30  
SMIM31  
SMIM33  
SMIM35  
SMIM36  
SMIM4  
SMIM5  
SMIM7  
SMIM8  
SMKR1  
SMN1  
SMN2  
SMNDC1  
SMO  
SMOX  
SMPD1  
SMPD2  
SMPD3  
SMPD4  
SMPD4BP  
SMPD4P1  
SMPDL3A  
SMPDL3B  
SMS  
SMTN

SMTNL1  
SMU1  
SMUG1  
SMURF1  
SMURF2  
SMYD2  
SMYD3  
SMYD4  
SMYD5  
SNAI1  
SNAI2  
SNAP23  
SNAP29  
SNAP47  
SNAPC1  
SNAPC2  
SNAPC3  
SNAPC4  
SNAPC5  
SNAPIN  
SNCA  
SNCAIP  
SND1  
SNED1  
SNF8  
SNHG28  
SNHG32  
SNIP1  
SNN  
SNRK  
SNRNP200  
SNRNP25  
SNRNP27  
SNRNP35  
SNRNP40  
SNRNP48  
SNRNP70  
SNRPA  
SNRPA1  
SNRPB  
SNRPB2  
SNRPC  
SNRPD1  
SNRPD2  
SNRPD3  
SNRPE  
SNRPF  
SNRPG  
SNRPN  
SNTA1  
SNTB1  
SNTB2  
SNTN  
SNU13  
SNUPN  
SNURF  
SNW1  
SNX1

SNX10  
SNX11  
SNX12  
SNX13  
SNX14  
SNX15  
SNX16  
SNX17  
SNX18  
SNX18P3  
SNX18P7  
SNX19  
SNX2  
SNX20  
SNX21  
SNX22  
SNX24  
SNX25  
SNX27  
SNX29  
SNX29P1  
SNX29P2  
SNX3  
SNX30  
SNX31  
SNX32  
SNX33  
SNX4  
SNX5  
SNX6  
SNX7  
SNX8  
SNX9  
SOAT1  
SOBP  
SOCS1  
SOCS2  
SOCS3  
SOCS4  
SOCS5  
SOCS6  
SOCS7  
SOD1  
SOD2  
SOGA1  
SON  
SORBS1  
SORBS2  
SORBS3  
SORD  
SORD2P  
SORL1  
SORT1  
SOS1  
SOS2  
SOSTDC1  
SOWAHB  
SOWAHC

SOX11  
SOX12  
SOX13  
SOX15  
SOX2  
SOX21  
SOX4  
SOX5  
SOX6  
SOX7  
SOX9  
SP1  
SP100  
SP110  
SP140  
SP140L  
SP2  
SP3  
SP4  
SP8  
SPA17  
SPACA6  
SPACA7  
SPACA9  
SPAG1  
SPAG16  
SPAG17  
SPAG4  
SPAG5  
SPAG6  
SPAG7  
SPAG8  
SPAG9  
SPARC  
SPARCL1  
SPART  
SPAST  
SPATA1  
SPATA12  
SPATA13  
SPATA17  
SPATA18  
SPATA2  
SPATA20  
SPATA21  
SPATA24  
SPATA2L  
SPATA31C1  
SPATA32  
SPATA33  
SPATA4  
SPATA5  
SPATA5L1  
SPATA6  
SPATA6L  
SPATA7  
SPATS1  
SPATS2

SPATS2L  
SPC24  
SPC25  
SPCS1  
SPCS2  
SPCS2P4  
SPCS3  
SPDEF  
SPDL1  
SPDYA  
SPDYE1  
SPDYE10P  
SPDYE16  
SPDYE2  
SPDYE2B  
SPDYE3  
SPDYE5  
SPDYE6  
SPDYE8  
SPDYE9  
SPECC1  
SPECC1L  
SPECC1L-ADORA2A  
SPEF1  
SPEF2  
SPEG  
SPEN  
SPG11  
SPG21  
SPG7  
SPHK1  
SPHK2  
SPI1  
SPIB  
SPICE1  
SPIDR  
SPIN1  
SPIN2B  
SPIN4  
SPINDOC  
SPINK5  
SPINK7  
SPINK9  
SPINT1  
SPINT2  
SPIRE1  
SPIRE2  
SPN  
SPNS1  
SPNS2  
SPOCD1  
SPOCK1  
SPOCK2  
SPON1  
SPON2  
SPOP  
SPOPL  
SPOUT1



SPP1  
SPP2  
SPPL2A  
SPPL2B  
SPPL3  
SPR  
SPRED1  
SPRED2  
SPRED3  
SPRR1B  
SPRR2A  
SPRR2D  
SPRR2E  
SPRR3  
SPRTN  
SPRY1  
SPRY2  
SPRY3  
SPRY4  
SPRYD3  
SPRYD4  
SPRYD7  
SPSB1  
SPSB2  
SPSB3  
SPTA1  
SPTAN1  
SPTB  
SPTBN1  
SPTBN2  
SPTBN5  
SPTLC1  
SPTLC2  
SPTLC3  
SPTSSA  
SPTSSB  
SPTY2D1  
SPTY2D1OS  
SQLE  
SQOR  
SQSTM1  
SRA1  
SRARP  
SRBD1  
SRC  
SRCAP  
SRCIN1  
SRD5A1  
SRD5A2  
SRD5A3  
SREBF1  
SREBF2  
SREK1  
SREK1IP1  
SRF  
SRFBP1  
SRGAP1  
SRGAP2

SRGAP2B  
SRGAP2C  
SRGAP2D  
SRGAP3  
SRGN  
SRI  
SRL  
SRM  
SRP14  
SRP19  
SRP54  
SRP54-AS1  
SRP68  
SRP72  
SRP72P2  
SRP9  
SRPK1  
SRPK2  
SRPK3  
SRPRA  
SRPRB  
SRPX2  
SRR  
SRRD  
SRRM1  
SRRM1P3  
SRRM2  
SRRM4  
SRRM5  
SRRT  
SRSF1  
SRSF10  
SRSF11  
SRSF12  
SRSF2  
SRSF3  
SRSF4  
SRSF5  
SRSF6  
SRSF7  
SRSF8  
SRSF9  
SRXN1  
SS18  
SS18L1  
SS18L2  
SSB  
SSBP1  
SSBP2  
SSBP3  
SSBP4  
SSC5D  
SSH1  
SSH2  
SSH3  
SSNA1  
SSPN  
SSPO

SSR1  
SSR2  
SSR3  
SSR4  
SSRP1  
SSTR2  
SSU72  
SSUH2  
SSX2IP  
ST13  
ST14  
ST18  
ST20  
ST20-MTHFS  
ST3GAL1  
ST3GAL2  
ST3GAL3  
ST3GAL4  
ST3GAL5  
ST3GAL6  
ST6GAL1  
ST6GAL2  
ST6GALNAC1  
ST6GALNAC2  
ST6GALNAC3  
ST6GALNAC4  
ST6GALNAC5  
ST6GALNAC6  
ST7  
ST7L  
ST8SIA1  
ST8SIA4  
ST8SIA5  
ST8SIA6  
STAB1  
STAC2  
STAC3  
STAG1  
STAG2  
STAG3  
STAG3L1  
STAG3L2  
STAG3L3  
STAG3L4  
STAG3L5P  
STAM  
STAM2  
STAMBP  
STAMBPL1  
STAP1  
STAP2  
STAR  
STARD10  
STARD13  
STARD3  
STARD3NL  
STARD4  
STARD5

STARD7  
STARD8  
STARD9  
STAT1  
STAT2  
STAT3  
STAT4  
STAT5A  
STAT5B  
STAT6  
STATH  
STAU1  
STAU2  
STBD1  
STC1  
STEAP1  
STEAP2  
STEAP3  
STEAP4  
STIL  
STIM1  
STIM2  
STIMATE  
STIMATE-MUSTN1  
STING1  
STIP1  
STK10  
STK11  
STK11IP  
STK16  
STK17A  
STK17B  
STK19  
STK24  
STK25  
STK26  
STK3  
STK31  
STK32C  
STK33  
STK35  
STK36  
STK38  
STK38L  
STK39  
STK4  
STK40  
STMN1  
STMN3  
STMND1  
STMP1  
STN1  
STOM  
STOML1  
STOML2  
STOML3  
STON1  
STON1-GTF2A1L

STON2  
STOX1  
STOX2  
STPG1  
STPG2  
STPG4  
STRA6  
STRADA  
STRADB  
STRAP  
STRBP  
STRC  
STRIP1  
STRIP2  
STRN  
STRN3  
STRN4  
STS  
STT3A  
STT3B  
STUB1  
STUM  
STX10  
STX11  
STX12  
STX16  
STX16-NPEPL1  
STX17  
STX18  
STX19  
STX1A  
STX1B  
STX2  
STX3  
STX4  
STX5  
STX6  
STX7  
STX8  
STXBP1  
STXBP2  
STXBP3  
STXBP4  
STXBP5  
STXBP5L  
STXBP6  
STYK1  
STYX  
STYXL1  
SUB1  
SUCLA2  
SUCLG1  
SUCLG2  
SUCLG2P4  
SUCNR1  
SUCO  
SUDS3  
SUFU

SUGP1  
SUGP2  
SUGT1  
SUGT1P3  
SULF1  
SULF2  
SULT1A1  
SULT1A2  
SULT1A3  
SULT1A4  
SULT1B1  
SULT1C2  
SULT1C2P1  
SULT1C4  
SULT1E1  
SULT2A1  
SULT2B1  
SUMF1  
SUMF2  
SUMO1  
SUMO2  
SUMO3  
SUN1  
SUN2  
SUOX  
SUPT16H  
SUPT20H  
SUPT3H  
SUPT4H1  
SUPT5H  
SUPT6H  
SUPT7L  
SUPV3L1  
SURF1  
SURF2  
SURF4  
SURF6  
SUSD1  
SUSD2  
SUSD3  
SUSD4  
SUSD5  
SUSD6  
SUV39H1  
SUV39H2  
SUZ12  
SUZ12P1  
SV2A  
SV2B  
SV2C  
SVBP  
SVEP1  
SVIL  
SVIL-AS1  
SVIP  
SVOP  
SVOPL  
SWAP70

SWI5  
SWSAP1  
SWT1  
SYAP1  
SYBU  
SYCP1  
SYCP2  
SYCP3  
SYDE2  
SYF2  
SYK  
SYMPK  
SYN2  
SYN3  
SYNC  
SYNCRIP  
SYNE1  
SYNE2  
SYNE3  
SYNE4  
SYNGAP1  
SYNGR1  
SYNGR2  
SYNJ1  
SYNJ2  
SYNJ2BP  
SYNJ2BP-COX16  
SYNM  
SYNPO  
SYNPO2  
SYNPO2L  
SYNRG  
SYP  
SYPL1  
SYS1  
SYS1-DBNDD2  
SYT1  
SYT11  
SYT12  
SYT13  
SYT14  
SYT15  
SYT16  
SYT17  
SYT2  
SYT5  
SYT7  
SYT8  
SYTL1  
SYTL2  
SYTL3  
SYTL4  
SYTL5  
SYVN1  
SZRD1  
SZT2  
TAB1  
TAB2

TAB3  
TAC4  
TACC1  
TACC2  
TACC3  
TACO1  
TACR2  
TACSTD2  
TADA1  
TADA2A  
TADA2B  
TADA3  
TAF1  
TAF10  
TAF11  
TAF12  
TAF13  
TAF15  
TAF1A  
TAF1B  
TAF1C  
TAF1D  
TAF2  
TAF3  
TAF4  
TAF4B  
TAF5  
TAF5L  
TAF6  
TAF6L  
TAF7  
TAF8  
TAF9  
TAF9B  
TAF A2  
TAGAP  
TAGLN  
TAGLN2  
TAGLN3  
TAL1  
TALDO1  
TAMM41  
TANC1  
TANC2  
TANGO2  
TANGO6  
TANK  
TAOK1  
TAOK2  
TAOK3  
TAP1  
TAP2  
TAPBP  
TAPBPL  
TAPT1  
TARBP1  
TARBP2  
TARDBP



TARS1  
TARS2  
TARS3  
TAS1R1  
TAS2R14  
TAS2R30  
TAS2R4  
TASOR  
TASOR2  
TASP1  
TAT  
TATDN1  
TATDN1P1  
TATDN2  
TATDN2P2  
TATDN3  
TAX1BP1  
TAX1BP3  
TAZ  
TBC1D1  
TBC1D10A  
TBC1D10B  
TBC1D10C  
TBC1D12  
TBC1D13  
TBC1D14  
TBC1D15  
TBC1D16  
TBC1D17  
TBC1D19  
TBC1D2  
TBC1D20  
TBC1D22A  
TBC1D22B  
TBC1D23  
TBC1D24  
TBC1D25  
TBC1D27P  
TBC1D29P  
TBC1D2B  
TBC1D30  
TBC1D31  
TBC1D32  
TBC1D3B  
TBC1D3I  
TBC1D3L  
TBC1D4  
TBC1D5  
TBC1D7  
TBC1D8  
TBC1D8B  
TBC1D9  
TBC1D9B  
TBCA  
TBCB  
TBCC  
TBCCD1  
TBCD

TBCEL  
TBCK  
TBK1  
TBKBP1  
TBL1X  
TBL1XR1  
TBL2  
TBL3  
TBP  
TBPL1  
TBR1  
TBRG1  
TBRG4  
TBX1  
TBX18  
TBX19  
TBX21  
TBX6  
TBXA2R  
TBXAS1  
TC2N  
TCAF1  
TCAF2  
TCAIM  
TCEA1  
TCEA1P2  
TCEA2  
TCEA3  
TCEAL1  
TCEAL3  
TCEAL4  
TCEAL8  
TCEAL9  
TCEANC  
TCEANC2  
TCERG1  
TCF12  
TCF19  
TCF20  
TCF21  
TCF23  
TCF24  
TCF25  
TCF3  
TCF4  
TCF7  
TCF7L1  
TCF7L2  
TCFL5  
TCHH  
TCHP  
TCIM  
TCIRG1  
TCL1A  
TCN1  
TCN2  
TCOF1  
TCP1

TCP10L  
TCP11  
TCP11L1  
TCP11L2  
TCP11X1  
TCP11X2  
TCTA  
TCTE1  
TCTE3  
TCTEX1D1  
TCTEX1D2  
TCTEX1D4  
TCTN1  
TCTN2  
TCTN3  
TDG  
TDGF1  
TDGF1P3  
TDP1  
TDP2  
TDRD1  
TDRD12  
TDRD3  
TDRD6  
TDRD7  
TDRD9  
TDRKH  
TDRP  
TEAD1  
TEAD3  
TEC  
TECPR1  
TECPR2  
TECR  
TECRL  
TECRP1  
TEDC1  
TEDDM1  
TEF  
TEFM  
TEKT1  
TEKT2  
TEKT3  
TEKT4  
TEKT4P2  
TELO2  
TEN1  
TEN1-CDK3  
TENM1  
TENM2  
TENM4  
TENT2  
TENT4A  
TENT4B  
TENT5A  
TENT5B  
TENT5C  
TEP1

TEPP  
TEPSIN  
TERB1  
TERF1  
TERF2  
TERF2IP  
TES  
TESC  
TESK1  
TESK2  
TESMIN  
TESPA1  
TET1  
TET2  
TET3  
TEX10  
TEX101  
TEX14  
TEX2  
TEX26  
TEX261  
TEX264  
TEX30  
TEX35  
TEX55  
TEX9  
TF  
TFAM  
TFAP2A  
TFAP2C  
TFAP4  
TFB1M  
TFB2M  
TFCP2  
TFCP2L1  
TFDP1  
TFDP2  
TFE3  
TFEB  
TFEC  
TFF3  
TFG  
TFIP11  
TFPI  
TFPT  
TFR2  
TFRC  
TG  
TGDS  
TGFA  
TGFB1  
TGFB1I1  
TGFB2  
TGFB3  
TGFB1  
TGFB1  
TGFB2  
TGFB3

TGFBRAP1  
TGIF1  
TGIF2  
TGIF2-RAB5IF  
TGM1  
TGM2  
TGM3  
TGOLN2  
TGS1  
THADA  
THAP1  
THAP10  
THAP11  
THAP12  
THAP12P7  
THAP12P9  
THAP2  
THAP3  
THAP4  
THAP5  
THAP6  
THAP7  
THAP8  
THAP9  
THBD  
THBS1  
THBS3  
THBS4  
THEM4  
THEM6  
THEMIS  
THEMIS2  
THG1L  
THNSL1  
THNSL2  
THOC1  
THOC2  
THOC3  
THOC5  
THOC6  
THOC7  
THOP1  
THRA  
THRAP3  
THRB  
THSD1  
THSD4  
THSD7A  
THTPA  
THUMPD1  
THUMPD2  
THUMPD3  
THYN1  
TIA1  
TIAF1  
TIAL1  
TIAM1  
TIAM2

TICAM1  
TICAM2  
TICRR  
TIE1  
TIFA  
TIFAB  
TIGAR  
TIGD1  
TIGD2  
TIGD4  
TIGD5  
TIGD6  
TIGD7  
TIGIT  
TIMELESS  
TIMM10  
TIMM10B  
TIMM13  
TIMM17A  
TIMM17B  
TIMM21  
TIMM22  
TIMM23  
TIMM23B  
TIMM29  
TIMM44  
TIMM50  
TIMM8B  
TIMM9  
TIMMDC1  
TIMP1  
TIMP2  
TIMP3  
TIMP4  
TINAGL1  
TINCR  
TINF2  
TIPARP  
TIPIN  
TIPRL  
TIRAP  
TJAP1  
TJP1  
TJP2  
TJP3  
TK1  
TK2  
TKFC  
TKT  
TKTL1  
TLCD1  
TLCD2  
TLCD3A  
TLCD3B  
TLCD4  
TLCD4-RWDD3  
TLCD5  
TLDC2

TLE1  
TLE2  
TLE3  
TLE4  
TLE5  
TLK1  
TLK2  
TLK2P2  
TLL2  
TLN1  
TLN2  
TLNRD1  
TLR1  
TLR10  
TLR2  
TLR3  
TLR4  
TLR5  
TLR6  
TLR7  
TLR8  
TM2D1  
TM2D2  
TM2D3  
TM4SF1  
TM4SF20  
TM6SF1  
TM7SF2  
TM7SF3  
TM9SF1  
TM9SF2  
TM9SF3  
TM9SF4  
TMA16  
TMA7  
TMBIM1  
TMBIM4  
TMBIM6  
TMC2  
TMC3  
TMC4  
TMC5  
TMC6  
TMC7  
TMC8  
TMCC1  
TMCC2  
TMCC3  
TMCO1  
TMCO3  
TMCO4  
TMCO5A  
TMCO5B  
TMCO6  
TMED1  
TMED10  
TMED2  
TMED3

TMED4  
TMED5  
TMED7  
TMED7-TICAM2  
TMED8  
TMED9  
TMEM101  
TMEM104  
TMEM106A  
TMEM106B  
TMEM106C  
TMEM107  
TMEM108  
TMEM109  
TMEM11  
TMEM115  
TMEM116  
TMEM117  
TMEM119  
TMEM120A  
TMEM120B  
TMEM121B  
TMEM123  
TMEM125  
TMEM126A  
TMEM126B  
TMEM127  
TMEM128  
TMEM129  
TMEM130  
TMEM131  
TMEM131L  
TMEM132A  
TMEM132B  
TMEM134  
TMEM135  
TMEM138  
TMEM139  
TMEM140  
TMEM141  
TMEM143  
TMEM144  
TMEM145  
TMEM147  
TMEM14A  
TMEM14B  
TMEM14C  
TMEM150A  
TMEM150C  
TMEM154  
TMEM156  
TMEM159  
TMEM160  
TMEM161A  
TMEM161B  
TMEM163  
TMEM164  
TMEM165



TMEM167A  
TMEM167B  
TMEM168  
TMEM169  
TMEM17  
TMEM170A  
TMEM170B  
TMEM171  
TMEM175  
TMEM176A  
TMEM176B  
TMEM177  
TMEM178A  
TMEM178B  
TMEM179B  
TMEM18  
TMEM181  
TMEM182  
TMEM183A  
TMEM183B  
TMEM184A  
TMEM184B  
TMEM184C  
TMEM185A  
TMEM185B  
TMEM186  
TMEM187  
TMEM189  
TMEM189-UBE2V1  
TMEM19  
TMEM190  
TMEM191C  
TMEM192  
TMEM198B  
TMEM199  
TMEM200A  
TMEM200B  
TMEM200C  
TMEM201  
TMEM203  
TMEM205  
TMEM208  
TMEM209  
TMEM212  
TMEM213  
TMEM214  
TMEM216  
TMEM217  
TMEM218  
TMEM219  
TMEM220  
TMEM222  
TMEM223  
TMEM229B  
TMEM230  
TMEM231  
TMEM231P1  
TMEM232

TMEM234  
TMEM236  
TMEM237  
TMEM238  
TMEM238L  
TMEM241  
TMEM242  
TMEM243  
TMEM245  
TMEM248  
TMEM25  
TMEM250  
TMEM251  
TMEM254  
TMEM255A  
TMEM255B  
TMEM258  
TMEM259  
TMEM260  
TMEM262  
TMEM263  
TMEM265  
TMEM266  
TMEM267  
TMEM268  
TMEM269  
TMEM272  
TMEM273  
TMEM30A  
TMEM30B  
TMEM33  
TMEM35A  
TMEM35B  
TMEM37  
TMEM38A  
TMEM38B  
TMEM39A  
TMEM39B  
TMEM40  
TMEM41A  
TMEM41B  
TMEM42  
TMEM43  
TMEM44  
TMEM45A  
TMEM45B  
TMEM47  
TMEM50A  
TMEM50B  
TMEM51  
TMEM52  
TMEM52B  
TMEM53  
TMEM54  
TMEM59  
TMEM60  
TMEM61  
TMEM62

TMEM63A  
TMEM63B  
TMEM63C  
TMEM64  
TMEM65  
TMEM67  
TMEM68  
TMEM69  
TMEM70  
TMEM71  
TMEM79  
TMEM80  
TMEM86A  
TMEM87A  
TMEM87B  
TMEM88  
TMEM8B  
TMEM9  
TMEM91  
TMEM92  
TMEM94  
TMEM97  
TMEM98  
TMEM99  
TMEM9B  
TMF1  
TMLHE  
TMOD1  
TMOD2  
TMOD3  
TMPO  
TMPPE  
TMPRSS11A  
TMPRSS11B  
TMPRSS11BNL  
TMPRSS11D  
TMPRSS11E  
TMPRSS12  
TMPRSS13  
TMPRSS2  
TMPRSS3  
TMPRSS4  
TMPRSS7  
TMSB10  
TMSB15B  
TMSB4X  
TMTC1  
TMTC2  
TMTC3  
TMTC4  
TMUB1  
TMUB2  
TMX1  
TMX2  
TMX2P1  
TMX3  
TMX4  
TNC

TNF  
TNFAIP1  
TNFAIP2  
TNFAIP3  
TNFAIP6  
TNFAIP8  
TNFAIP8L1  
TNFAIP8L2  
TNFAIP8L3  
TNFRSF10A  
TNFRSF10B  
TNFRSF10C  
TNFRSF10D  
TNFRSF11A  
TNFRSF11B  
TNFRSF12A  
TNFRSF13B  
TNFRSF13C  
TNFRSF14  
TNFRSF19  
TNFRSF1A  
TNFRSF1B  
TNFRSF21  
TNFRSF25  
TNFRSF6B  
TNFRSF8  
TNFRSF9  
TNFSF10  
TNFSF12  
TNFSF12-TNFSF13  
TNFSF13  
TNFSF13B  
TNFSF14  
TNFSF15  
TNFSF4  
TNFSF8  
TNFSF9  
TNIK  
TNIP1  
TNIP2  
TNIP3  
TNK1  
TNK2  
TNKS  
TNKS1BP1  
TNKS2  
TNNC1  
TNNI1  
TNNI2  
TNNI3  
TNNT2  
TNNT3  
TNPO1  
TNPO2  
TNPO3  
TNR  
TNRC18  
TNRC6A

TNRC6B  
TNRC6C  
TNS1  
TNS2  
TNS3  
TNS4  
TNXB  
TOB1  
TOB2  
TOE1  
TOGARAM1  
TOGARAM2  
TOLLIP  
TOM1  
TOM1L1  
TOM1L2  
TOMM20  
TOMM22  
TOMM34  
TOMM40  
TOMM40L  
TOMM5  
TOMM6  
TOMM7  
TOMM70  
TONSL  
TOP1  
TOP1MT  
TOP2A  
TOP2B  
TOP3A  
TOP3B  
TOPBP1  
TOPORS  
TOR1A  
TOR1AIP1  
TOR1AIP2  
TOR1B  
TOR2A  
TOR3A  
TOR4A  
TOX  
TOX2  
TOX3  
TOX4  
TOX4P1  
TP53  
TP53AIP1  
TP53BP1  
TP53BP2  
TP53I11  
TP53I13  
TP53I3  
TP53INP1  
TP53INP2  
TP53RK  
TP63  
TP73

TP73-AS1  
TPBG  
TPCN1  
TPCN2  
TPD52  
TPD52L1  
TPD52L2  
TPGS1  
TPGS2  
TPH1  
TPH2  
TPI1  
TPI1P2  
TPK1  
TPM1  
TPM2  
TPM3  
TPM3P9  
TPM4  
TPMT  
TPO  
TPP1  
TPP2  
TPPP  
TPPP3  
TPR  
TPRA1  
TPRG1  
TPRG1L  
TPRKB  
TPRN  
TPRXL  
TPSAB1  
TPSB2  
TPST1  
TPST2  
TPT1  
TPTE2P2  
TPTE2P5  
TPTE2P6  
TPTEP1  
TPTEP2  
TPX2  
TRA2A  
TRA2B  
TRABD  
TRABD2A  
TRAC  
TRADD  
TRAF1  
TRAF2  
TRAF3  
TRAF3IP1  
TRAF3IP2  
TRAF3IP3  
TRAF4  
TRAF5  
TRAF6

TRAF7  
TRAID1  
TRAIP  
TRAK1  
TRAK2  
TRAM1  
TRAM2  
TRANK1  
TRAP1  
TRAPPC1  
TRAPPC10  
TRAPPC11  
TRAPPC12  
TRAPPC13  
TRAPPC2  
TRAPPC2B  
TRAPPC2L  
TRAPPC3  
TRAPPC3L  
TRAPPC4  
TRAPPC5  
TRAPPC6A  
TRAPPC6B  
TRAPPC8  
TRAPPC9  
TRAT1  
TRBC1  
TRBC2  
TRDC  
TRDMT1  
TREM1  
TREM2  
TREML1  
TREML2  
TREML3P  
TREML4  
TRERF1  
TRES1  
TRGC1  
TRGC2  
TRHDE  
TRIAP1  
TRIB1  
TRIB2  
TRIB3  
TRIM11  
TRIM13  
TRIM14  
TRIM16  
TRIM16L  
TRIM2  
TRIM21  
TRIM22  
TRIM23  
TRIM24  
TRIM25  
TRIM26  
TRIM27

TRIM28  
TRIM29  
TRIM3  
TRIM31  
TRIM32  
TRIM33  
TRIM34  
TRIM35  
TRIM36  
TRIM37  
TRIM38  
TRIM39  
TRIM4  
TRIM41  
TRIM44  
TRIM45  
TRIM46  
TRIM47  
TRIM5  
TRIM52  
TRIM55  
TRIM56  
TRIM58  
TRIM59  
TRIM6  
TRIM61  
TRIM62  
TRIM65  
TRIM66  
TRIM68  
TRIM69  
TRIM7  
TRIM71  
TRIM72  
TRIM73  
TRIM8  
TRIM9  
TRIO  
TRIOBP  
TRIP10  
TRIP11  
TRIP12  
TRIP13  
TRIP4  
TRIP6  
TRIQK  
TRIR  
TRIT1  
TRMO  
TRMT1  
TRMT10A  
TRMT10B  
TRMT10C  
TRMT11  
TRMT112  
TRMT12  
TRMT13  
TRMT1L



TRMT2A  
TRMT2B  
TRMT44  
TRMT5  
TRMT6  
TRMT61A  
TRMT61B  
TRMT9B  
TRMU  
TRNAU1AP  
TRNP1  
TRNT1  
TRO  
TROAP  
TRPC1  
TRPC3  
TRPC4AP  
TRPC5  
TRPM2  
TRPM3  
TRPM4  
TRPM6  
TRPM7  
TRPM8  
TRPS1  
TRPT1  
TRPV1  
TRPV2  
TRPV3  
TRPV4  
TRPV6  
TRRAP  
TRUB1  
TRUB2  
TSC1  
TSC2  
TSC22D1  
TSC22D2  
TSC22D3  
TSC22D4  
TSEN15  
TSEN2  
TSEN34  
TSEN54  
TSFM  
TSG101  
TSGA10  
TSHR  
TSHZ1  
TSHZ2  
TSHZ3  
TSKU  
TSN  
TSNARE1  
TSNAX  
TSNAXIP1  
TSPAN1  
TSPAN10

TSPAN11  
TSPAN12  
TSPAN13  
TSPAN14  
TSPAN15  
TSPAN17  
TSPAN19  
TSPAN2  
TSPAN3  
TSPAN31  
TSPAN33  
TSPAN5  
TSPAN6  
TSPAN7  
TSPAN8  
TSPAN9  
TSPO  
TSPOAP1  
TSPY26P  
TSPYL1  
TSPYL2  
TSPYL4  
TSPYL5  
TSR1  
TSR2  
TSR3  
TSSC2  
TSSC4  
TST  
TSTA3  
TSTD1  
TSTD2  
TSTD3  
TTBK1  
TTBK2  
TTC1  
TTC12  
TTC13  
TTC14  
TTC16  
TTC17  
TTC19  
TTC21A  
TTC21B  
TTC22  
TTC23  
TTC23L  
TTC25  
TTC26  
TTC27  
TTC28  
TTC29  
TTC3  
TTC30A  
TTC30B  
TTC31  
TTC32  
TTC33

TTC34  
TTC37  
TTC38  
TTC39A  
TTC39B  
TTC39C  
TTC3P1  
TTC4  
TTC41P  
TTC5  
TTC6  
TTC7A  
TTC7B  
TTC8  
TTC9  
TTC9C  
TTF1  
TTF2  
TTI1  
TTI2  
TTK  
TTL  
TTLL1  
TTLL10  
TTLL11  
TTLL12  
TTLL13P  
TTLL3  
TTLL4  
TTLL5  
TTLL6  
TTLL7  
TTLL9  
TTN  
TTPA  
TTPAL  
TTYH1  
TTYH2  
TTYH3  
TUB  
TUBA1A  
TUBA1B  
TUBA1C  
TUBA4A  
TUBA4B  
TUBA8  
TUBB  
TUBB2A  
TUBB2B  
TUBB2BP1  
TUBB3  
TUBB4B  
TUBB6  
TUBBP5  
TUBD1  
TUBE1  
TUBG1  
TUBG2

TUBGCP2  
TUBGCP3  
TUBGCP4  
TUBGCP5  
TUBGCP6  
TUFM  
TUFT1  
TULP2  
TULP3  
TULP4  
TUNAR  
TUSC1  
TUSC2  
TUSC3  
TUT1  
TUT4  
TUT7  
TVP23A  
TVP23B  
TVP23C  
TVP23C-CDRT4  
TWF1  
TWF2  
TWISTNB  
TWNK  
TWSG1  
TXK  
TXLNA  
TXLNB  
TXLNG  
TXLNGY  
TXN  
TXN2  
TXNDC11  
TXNDC12  
TXNDC15  
TXNDC16  
TXNDC17  
TXNDC2  
TXNDC5  
TXNDC8  
TXNDC9  
TXNIP  
TXNL1  
TXNL4A  
TXNL4B  
TXNRD1  
TXNRD2  
TXNRD3  
TYK2  
TYMP  
TYMS  
TYR  
TYRO3  
TYROBP  
TYSND1  
TYW1  
TYW1B

TYW3  
TYW5  
U2AF1  
U2AF1L4  
U2AF1L5  
U2AF2  
U2SURP  
UACA  
UAP1  
UAP1L1  
UBA1  
UBA2  
UBA3  
UBA5  
UBA52  
UBA6  
UBA7  
UBAC1  
UBAC2  
UBALD1  
UBALD2  
UBAP1  
UBAP1L  
UBAP2  
UBAP2L  
UBASH3A  
UBASH3B  
UBB  
UBBP4  
UBC  
UBD  
UBE2A  
UBE2B  
UBE2D1  
UBE2D2  
UBE2D3  
UBE2D4  
UBE2E1  
UBE2E2  
UBE2E3  
UBE2F  
UBE2G1  
UBE2G2  
UBE2H  
UBE2I  
UBE2J1  
UBE2J2  
UBE2K  
UBE2L3  
UBE2L6  
UBE2M  
UBE2N  
UBE2O  
UBE2Q1  
UBE2Q2  
UBE2Q2P1  
UBE2Q2P2  
UBE2R2

UBE2S  
UBE2V1  
UBE2V2  
UBE2W  
UBE2Z  
UBE3A  
UBE3B  
UBE3C  
UBE3D  
UBE4A  
UBE4B  
UBFD1  
UBIAD1  
UBL3  
UBL4A  
UBL5  
UBL7  
UBLCP1  
UBN1  
UBN2  
UBOX5  
UBP1  
UBQLN1  
UBQLN2  
UBQLN4  
UBQLNL  
UBR1  
UBR2  
UBR3  
UBR4  
UBR5  
UBR7  
UBTD1  
UBTD2  
UBTF  
UBXN1  
UBXN10  
UBXN11  
UBXN2A  
UBXN2B  
UBXN4  
UBXN6  
UBXN7  
UBXN8  
UCHL1  
UCHL3  
UCHL5  
UCK1  
UCK2  
UCKL1  
UCN3  
UCP2  
UCP3  
UEVLD  
UFC1  
UFD1  
UFL1  
UFM1

UFSP2  
UGCG  
UGDH  
UGGT1  
UGGT2  
UGP2  
UGT1A1  
UGT1A10  
UGT1A6  
UGT1A7  
UGT2A1  
UGT2A2  
UGT3A1  
UGT8  
UHKM1  
UHRF1  
UHRF1BP1  
UHRF1BP1L  
UHRF2  
UHRF2P1  
UIMC1  
ULBP1  
ULBP3  
ULK1  
ULK2  
ULK3  
ULK4  
UMAD1  
UMODL1  
UMPS  
UNC119  
UNC119B  
UNC13A  
UNC13B  
UNC13C  
UNC13D  
UNC45A  
UNC50  
UNC5B  
UNC5C  
UNC79  
UNC80  
UNC93B1  
UNG  
UNK  
UNKL  
UPB1  
UPF1  
UPF2  
UPF3A  
UPF3B  
UPK1B  
UPK3B  
UPK3BL1  
UPP1  
UPP2  
UPRT  
UQCC1

UQCC2  
UQCC3  
UQCR10  
UQCR11  
UQCRB  
UQCRC1  
UQCRC2  
UQCRFS1  
UQCRFS1P1  
UQCRH  
UQCRHL  
UQCRQ  
URB1  
URB2  
URGCP  
URGCP-MRPS24  
URI1  
URM1  
UROD  
UROS  
USB1  
USE1  
USF1  
USF2  
USF3  
USH1C  
USH1G  
USH2A  
USHBP1  
USO1  
USP1  
USP10  
USP11  
USP12  
USP13  
USP14  
USP15  
USP16  
USP17L6P  
USP18  
USP19  
USP2  
USP20  
USP21  
USP22  
USP24  
USP25  
USP27X  
USP28  
USP3  
USP30  
USP31  
USP32  
USP32P1  
USP32P2  
USP33  
USP34  
USP35



USP36  
USP37  
USP38  
USP39  
USP4  
USP40  
USP41  
USP42  
USP43  
USP44  
USP45  
USP46  
USP47  
USP48  
USP49  
USP5  
USP51  
USP53  
USP54  
USP6  
USP6NL  
USP7  
USP8  
USP9X  
USP9Y  
USPL1  
UST  
UTP11  
UTP14A  
UTP14C  
UTP15  
UTP18  
UTP20  
UTP23  
UTP25  
UTP3  
UTP4  
UTP6  
UTRN  
UTS2  
UTS2B  
UTY  
UVRAG  
UVSSA  
UXS1  
UXT  
VAC14  
VAMP1  
VAMP2  
VAMP3  
VAMP4  
VAMP5  
VAMP7  
VAMP8  
VANGL1  
VANGL2  
VAPA  
VAPB

VAR1  
VAR2  
VASH1  
VASH2  
VASN  
VASP  
VAT1  
VAV1  
VAV2  
VAV3  
VBP1  
VCAM1  
VCAN  
VCL  
VCP  
VCP1P1  
VCPKMT  
VDAC1  
VDAC1P8  
VDAC2  
VDAC3  
VDR  
VEGFA  
VEGFB  
VEGFC  
VENTX  
VENTXP4  
VEPH1  
VEZF1  
VEZT  
VGLL1  
VGLL3  
VGLL4  
VHL  
VIL1  
VILL  
VIM  
VIPAS39  
VIPR1  
VIRMA  
VKORC1  
VKORC1L1  
VLDLR  
VMA21  
VMAC  
VMO1  
VMP1  
VN1R21P  
VN1R40P  
VNN1  
VNN2  
VNN3  
VOPP1  
VPS11  
VPS13A  
VPS13B  
VPS13C  
VPS13D

VPS16  
VPS18  
VPS25  
VPS26A  
VPS26B  
VPS26C  
VPS28  
VPS29  
VPS33A  
VPS33B  
VPS35  
VPS35L  
VPS36  
VPS37A  
VPS37B  
VPS37C  
VPS39  
VPS41  
VPS45  
VPS4A  
VPS4B  
VPS50  
VPS51  
VPS52  
VPS53  
VPS54  
VPS72  
VPS8  
VPS9D1  
VRK1  
VRK2  
VRK3  
VSIG1  
VSIG10  
VSIG10L  
VSIG2  
VSIG4  
VSIR  
VSNL1  
VSTM2A  
VSTM2L  
VSTM4  
VSX1  
VTA1  
VTCN1  
VTI1A  
VTI1B  
VWA1  
VWA2  
VWA3A  
VWA3B  
VWA5A  
VWA5B1  
VWA7  
VWA8  
VWC2  
VWCE  
VWDE

VWF  
VXN  
WAC  
WAPL  
WARS1  
WARS2  
WAS  
WASF1  
WASF2  
WASF3  
WASH2P  
WASH3P  
WASH4P  
WASH5P  
WASH6P  
WASH7P  
WASH8P  
WASH9P  
WASHC1  
WASHC2A  
WASHC2C  
WASHC3  
WASHC4  
WASHC5  
WASL  
WBP1  
WBP11  
WBP1L  
WBP2  
WBP2NL  
WBP4  
WDCP  
WDFY1  
WDFY2  
WDFY3  
WDFY4  
WDHD1  
WDPCP  
WDR1  
WDR11  
WDR12  
WDR13  
WDR17  
WDR18  
WDR19  
WDR20  
WDR24  
WDR25  
WDR26  
WDR27  
WDR3  
WDR31  
WDR33  
WDR34  
WDR35  
WDR36  
WDR37  
WDR38

WDR4  
WDR41  
WDR43  
WDR44  
WDR45  
WDR45B  
WDR45P1  
WDR46  
WDR47  
WDR48  
WDR49  
WDR5  
WDR53  
WDR54  
WDR55  
WDR59  
WDR5B  
WDR6  
WDR60  
WDR61  
WDR62  
WDR63  
WDR66  
WDR7  
WDR70  
WDR72  
WDR73  
WDR74  
WDR75  
WDR76  
WDR77  
WDR78  
WDR81  
WDR82  
WDR83  
WDR83OS  
WDR86  
WDR87  
WDR89  
WDR90  
WDR91  
WDR92  
WDR93  
WDR97  
WDSUB1  
WDTC1  
WDYHV1  
WEE1  
WEE2  
WFDC1  
WFDC11  
WFDC2  
WFDC21P  
WFDC3  
WFDC6  
WFS1  
WHAMM  
WHAMMP2

WHAMMP3  
WHRN  
WIPF1  
WIPF2  
WIPF3  
WIP11  
WIP12  
WIZ  
WLS  
WNK1  
WNK2  
WNK3  
WNK4  
WNT2B  
WNT4  
WNT5A  
WNT5B  
WNT7A  
WNT7B  
WNT9A  
WNT9B  
WRAP53  
WRAP73  
WRN  
WRNIP1  
WSB1  
WSB2  
WSCD2  
WTAP  
WTAPP1  
WTIP  
WWC1  
WWC2  
WWC3  
WWOX  
WWP1  
WWP2  
WWTR1  
XAB2  
XAF1  
XBP1  
XDH  
XG  
XIAP  
XIAPP2  
XIAPP3  
XK  
XKR4  
XKR5  
XKR6  
XKR8  
XKR9  
XKRX  
XPA  
XPC  
XPNPEP1  
XPNPEP3  
XPO1

XPO4  
XPO5  
XPO6  
XPO7  
XPOT  
XPR1  
XRCC1  
XRCC2  
XRCC3  
XRCC4  
XRCC5  
XRCC6  
XRN1  
XRN2  
XRR1  
XXYL1  
XYLB  
XYLT1  
XYLT2  
YAE1  
YAF2  
YAP1  
YARS1  
YARS2  
YBEY  
YBX1  
YBX1P1  
YBX3  
YDJC  
YEATS2  
YEATS4  
YES1  
YES1P1  
YIF1A  
YIF1B  
YIPF1  
YIPF2  
YIPF3  
YIPF4  
YIPF5  
YIPF6  
YJEFN3  
YJU2  
YKT6  
YLPM1  
YME1L1  
YOD1  
YPEL1  
YPEL2  
YPEL3  
YPEL5  
YRDC  
YTHDC1  
YTHDC2  
YTHDF1  
YTHDF2  
YTHDF3  
YWHAB

YWHAE  
YWHAEP1  
YWHAG  
YWHAH  
YWHAQ  
YWHAQP5  
YWHAZ  
YY1  
YY1AP1  
YY2  
Z82195.2  
Z95152.1  
Z97055.1  
Z97634.1  
Z98755.1  
ZACN  
ZADH2  
ZAP70  
ZBBX  
ZBED1  
ZBED2  
ZBED3  
ZBED4  
ZBED5  
ZBED6  
ZBED6CL  
ZBED8  
ZBP1  
ZBTB1  
ZBTB10  
ZBTB11  
ZBTB14  
ZBTB16  
ZBTB17  
ZBTB18  
ZBTB2  
ZBTB20  
ZBTB21  
ZBTB22  
ZBTB24  
ZBTB25  
ZBTB26  
ZBTB3  
ZBTB33  
ZBTB34  
ZBTB37  
ZBTB38  
ZBTB39  
ZBTB4  
ZBTB40  
ZBTB41  
ZBTB42  
ZBTB43  
ZBTB44  
ZBTB45  
ZBTB45P1  
ZBTB46  
ZBTB47



ZBTB48  
ZBTB49  
ZBTB5  
ZBTB6  
ZBTB7A  
ZBTB7B  
ZBTB7C  
ZBTB8A  
ZBTB8B  
ZBTB8OS  
ZBTB9  
ZC2HC1A  
ZC2HC1C  
ZC3H10  
ZC3H11A  
ZC3H12A  
ZC3H12B  
ZC3H12C  
ZC3H12D  
ZC3H13  
ZC3H14  
ZC3H15  
ZC3H18  
ZC3H3  
ZC3H4  
ZC3H6  
ZC3H7A  
ZC3H7B  
ZC3H8  
ZC3HAV1  
ZC3HAV1L  
ZC3HC1  
ZC4H2  
ZCCHC10  
ZCCHC14  
ZCCHC17  
ZCCHC2  
ZCCHC24  
ZCCHC3  
ZCCHC4  
ZCCHC7  
ZCCHC8  
ZCCHC9  
ZCRB1  
ZCWPW1  
ZCWPW2  
ZDHHHC1  
ZDHHHC11  
ZDHHHC11B  
ZDHHHC12  
ZDHHHC13  
ZDHHHC14  
ZDHHHC15  
ZDHHHC16  
ZDHHHC17  
ZDHHHC18  
ZDHHHC2  
ZDHHHC20

ZDHC21  
ZDHC23  
ZDHC24  
ZDHC3  
ZDHC4  
ZDHC4P1  
ZDHC5  
ZDHC6  
ZDHC7  
ZDHC8  
ZDHC9  
ZEB1  
ZEB2  
ZER1  
ZFAND1  
ZFAND2A  
ZFAND2B  
ZFAND3  
ZFAND4  
ZFAND5  
ZFAND6  
ZFAT  
ZFC3H1  
ZFH2  
ZFH3  
ZFH4  
ZFP1  
ZFP14  
ZFP2  
ZFP28  
ZFP3  
ZFP30  
ZFP36  
ZFP36L1  
ZFP36L2  
ZFP37  
ZFP41  
ZFP42  
ZFP62  
ZFP64  
ZFP69  
ZFP69B  
ZFP82  
ZFP90  
ZFP91  
ZFP91-CNTF  
ZFP92  
ZFPL1  
ZFPM1  
ZFPM2  
ZFR  
ZFR2  
ZFX  
ZFY  
ZFYVE1  
ZFYVE16  
ZFYVE19  
ZFYVE21

ZFYVE26  
ZFYVE27  
ZFYVE28  
ZFYVE9  
ZG16  
ZG16B  
ZGPAT  
ZGRF1  
ZHX1  
ZHX1-C8orf76  
ZHX2  
ZHX3  
ZIC3  
ZIK1  
ZIK1P1  
ZKSCAN1  
ZKSCAN2  
ZKSCAN3  
ZKSCAN4  
ZKSCAN5  
ZKSCAN7  
ZKSCAN8  
ZMAT1  
ZMAT2  
ZMAT3  
ZMAT5  
ZMIZ1  
ZMIZ2  
ZMPSTE24  
ZMYM1  
ZMYM2  
ZMYM3  
ZMYM4  
ZMYM5  
ZMYM6  
ZMYND10  
ZMYND11  
ZMYND12  
ZMYND15  
ZMYND19  
ZMYND8  
ZNF10  
ZNF100  
ZNF101  
ZNF106  
ZNF107  
ZNF112  
ZNF114  
ZNF117  
ZNF12  
ZNF121  
ZNF124  
ZNF131  
ZNF132  
ZNF133  
ZNF134  
ZNF135  
ZNF136

ZNF137P  
ZNF138  
ZNF14  
ZNF140  
ZNF141  
ZNF142  
ZNF143  
ZNF146  
ZNF148  
ZNF154  
ZNF155  
ZNF157  
ZNF16  
ZNF160  
ZNF165  
ZNF169  
ZNF17  
ZNF174  
ZNF175  
ZNF177  
ZNF18  
ZNF180  
ZNF181  
ZNF182  
ZNF184  
ZNF185  
ZNF189  
ZNF19  
ZNF195  
ZNF197  
ZNF2  
ZNF20  
ZNF200  
ZNF202  
ZNF204P  
ZNF205  
ZNF207  
ZNF208  
ZNF211  
ZNF212  
ZNF213  
ZNF214  
ZNF215  
ZNF217  
ZNF219  
ZNF22  
ZNF221  
ZNF222  
ZNF223  
ZNF224  
ZNF225  
ZNF226  
ZNF227  
ZNF229  
ZNF23  
ZNF230  
ZNF232  
ZNF233

ZNF234  
ZNF235  
ZNF236  
ZNF239  
ZNF24  
ZNF248  
ZNF25  
ZNF250  
ZNF251  
ZNF252P  
ZNF253  
ZNF254  
ZNF256  
ZNF257  
ZNF26  
ZNF260  
ZNF263  
ZNF264  
ZNF266  
ZNF267  
ZNF268  
ZNF271P  
ZNF273  
ZNF274  
ZNF275  
ZNF276  
ZNF277  
ZNF28  
ZNF280B  
ZNF280C  
ZNF280D  
ZNF281  
ZNF282  
ZNF283  
ZNF284  
ZNF285  
ZNF286A  
ZNF286B  
ZNF287  
ZNF292  
ZNF296  
ZNF3  
ZNF30  
ZNF300  
ZNF300P1  
ZNF302  
ZNF304  
ZNF311  
ZNF316  
ZNF317  
ZNF318  
ZNF319  
ZNF32  
ZNF320  
ZNF321P  
ZNF322  
ZNF322P1  
ZNF324

ZNF324B  
ZNF326  
ZNF329  
ZNF330  
ZNF331  
ZNF333  
ZNF334  
ZNF335  
ZNF337  
ZNF33A  
ZNF33B  
ZNF34  
ZNF341  
ZNF343  
ZNF345  
ZNF346  
ZNF347  
ZNF35  
ZNF350  
ZNF354A  
ZNF354B  
ZNF354C  
ZNF358  
ZNF362  
ZNF365  
ZNF366  
ZNF367  
ZNF37A  
ZNF37BP  
ZNF382  
ZNF383  
ZNF384  
ZNF385A  
ZNF385C  
ZNF385D  
ZNF391  
ZNF394  
ZNF395  
ZNF396  
ZNF397  
ZNF398  
ZNF404  
ZNF407  
ZNF408  
ZNF41  
ZNF410  
ZNF414  
ZNF415  
ZNF415P1  
ZNF416  
ZNF417  
ZNF418  
ZNF419  
ZNF420  
ZNF425  
ZNF426  
ZNF428  
ZNF429

ZNF43  
ZNF430  
ZNF431  
ZNF432  
ZNF433  
ZNF436  
ZNF438  
ZNF439  
ZNF44  
ZNF440  
ZNF441  
ZNF442  
ZNF443  
ZNF444  
ZNF445  
ZNF446  
ZNF449  
ZNF45  
ZNF451  
ZNF454  
ZNF460  
ZNF461  
ZNF462  
ZNF467  
ZNF468  
ZNF469  
ZNF470  
ZNF471  
ZNF473  
ZNF474  
ZNF48  
ZNF480  
ZNF483  
ZNF484  
ZNF485  
ZNF486  
ZNF487  
ZNF490  
ZNF491  
ZNF492  
ZNF493  
ZNF496  
ZNF497  
ZNF500  
ZNF501  
ZNF502  
ZNF503  
ZNF506  
ZNF507  
ZNF510  
ZNF511  
ZNF512  
ZNF512B  
ZNF513  
ZNF514  
ZNF516  
ZNF517  
ZNF518A

ZNF518B  
ZNF519  
ZNF519P1  
ZNF524  
ZNF525  
ZNF526  
ZNF527  
ZNF528  
ZNF529  
ZNF530  
ZNF532  
ZNF540  
ZNF542P  
ZNF543  
ZNF544  
ZNF546  
ZNF547  
ZNF548  
ZNF549  
ZNF550  
ZNF551  
ZNF552  
ZNF554  
ZNF555  
ZNF556  
ZNF557  
ZNF558  
ZNF559  
ZNF559-ZNF177  
ZNF56  
ZNF561  
ZNF562  
ZNF563  
ZNF564  
ZNF565  
ZNF566  
ZNF567  
ZNF568  
ZNF569  
ZNF57  
ZNF570  
ZNF571  
ZNF572  
ZNF573  
ZNF574  
ZNF576  
ZNF577  
ZNF578  
ZNF579  
ZNF580  
ZNF581  
ZNF582  
ZNF583  
ZNF584  
ZNF585A  
ZNF585B  
ZNF586  
ZNF587



ZNF587B  
ZNF589  
ZNF592  
ZNF594  
ZNF595  
ZNF596  
ZNF597  
ZNF598  
ZNF599  
ZNF600  
ZNF605  
ZNF606  
ZNF607  
ZNF608  
ZNF609  
ZNF610  
ZNF611  
ZNF613  
ZNF614  
ZNF615  
ZNF616  
ZNF618  
ZNF619  
ZNF620  
ZNF621  
ZNF622  
ZNF623  
ZNF624  
ZNF625  
ZNF625-ZNF20  
ZNF626  
ZNF627  
ZNF628  
ZNF629  
ZNF630  
ZNF638  
ZNF639  
ZNF641  
ZNF644  
ZNF646  
ZNF648  
ZNF649  
ZNF652  
ZNF653  
ZNF654  
ZNF655  
ZNF658  
ZNF658B  
ZNF66  
ZNF660  
ZNF662  
ZNF663P  
ZNF664  
ZNF665  
ZNF667  
ZNF668  
ZNF669  
ZNF670

ZNF670-ZNF695

ZNF671

ZNF672

ZNF674

ZNF675

ZNF677

ZNF678

ZNF680

ZNF680P1

ZNF681

ZNF682

ZNF683

ZNF684

ZNF687

ZNF688

ZNF689

ZNF69

ZNF691

ZNF692

ZNF695

ZNF696

ZNF697

ZNF699

ZNF7

ZNF70

ZNF700

ZNF701

ZNF702P

ZNF703

ZNF704

ZNF706

ZNF707

ZNF708

ZNF709

ZNF71

ZNF710

ZNF711

ZNF713

ZNF714

ZNF716

ZNF717

ZNF718

ZNF720

ZNF721

ZNF724

ZNF726

ZNF727

ZNF736

ZNF737

ZNF738

ZNF74

ZNF740

ZNF746

ZNF747

ZNF749

ZNF750

ZNF75A

ZNF75D

ZNF76  
ZNF761  
ZNF763  
ZNF764  
ZNF765  
ZNF766  
ZNF767P  
ZNF768  
ZNF77  
ZNF770  
ZNF771  
ZNF772  
ZNF773  
ZNF774  
ZNF775  
ZNF776  
ZNF777  
ZNF778  
ZNF780A  
ZNF780B  
ZNF781  
ZNF782  
ZNF783  
ZNF784  
ZNF785  
ZNF786  
ZNF787  
ZNF788P  
ZNF789  
ZNF79  
ZNF790  
ZNF791  
ZNF792  
ZNF793  
ZNF799  
ZNF8  
ZNF80  
ZNF800  
ZNF805  
ZNF808  
ZNF81  
ZNF812P  
ZNF813  
ZNF814  
ZNF816  
ZNF816-ZNF321P  
ZNF821  
ZNF823  
ZNF826P  
ZNF827  
ZNF829  
ZNF83  
ZNF830  
ZNF831  
ZNF833P  
ZNF835  
ZNF836  
ZNF837

ZNF839  
ZNF84  
ZNF841  
ZNF843  
ZNF844  
ZNF845  
ZNF846  
ZNF85  
ZNF850  
ZNF852  
ZNF853  
ZNF859P  
ZNF860  
ZNF862  
ZNF865  
ZNF875  
ZNF876P  
ZNF879  
ZNF880  
ZNF891  
ZNF90  
ZNF90P1  
ZNF91  
ZNF92  
ZNF93  
ZNF969P  
ZNF99  
ZNX1  
ZNHIT1  
ZNHIT2  
ZNHIT3  
ZNHIT6  
ZNRD1  
ZNRD1ASP  
ZNRD2  
ZNR1  
ZNR2  
ZNR2P2  
ZNR3  
ZP3  
ZBP2  
ZPLD2P  
ZPR1  
ZRB1  
ZRB2  
ZRB3  
ZRSR2  
ZSCAN12  
ZSCAN12P1  
ZSCAN16  
ZSCAN18  
ZSCAN2  
ZSCAN20  
ZSCAN21  
ZSCAN22  
ZSCAN25  
ZSCAN26  
ZSCAN29

ZSCAN30  
ZSCAN31  
ZSCAN32  
ZSCAN4  
ZSCAN5A  
ZSCAN9  
ZSWIM1  
ZSWIM3  
ZSWIM4  
ZSWIM5  
ZSWIM6  
ZSWIM7  
ZSWIM8  
ZSWIM9  
ZUP1  
ZW10  
ZWILCH  
ZWINT  
ZXDA  
ZXDB  
ZXDC  
ZYG11A  
ZYG11B  
ZYG  
ZZEF1
