# Supplementary material for: Identification of Novel COVID-19 Biomarkers by Multiple Feature Selection Strategies
Source: Hindawi journal article supplement (doi:10.1155/2021/2203636), 2021-09-27
Supplement: f2 [file 2203636.f2.pdf]

Supplementary Table S2 Screened top 500 feature genes after mRMR sequencing

| Order | Name       |
|-------|------------|
| 1     | OAS2       |
| 2     | RPLP0      |
| 3     | IGFBP2     |
| 4     | ZMYND10    |
| 5     | CLSTN1     |
| 6     | XAF1       |
| 7     | PRDX5      |
| 8     | RPL15      |
| 9     | KRT8       |
| 10    | HERC6      |
| 11    | C9orf24    |
| 12    | RPS7       |
| 13    | MAGED2     |
| 14    | CMPK2      |
| 15    | EEF2       |
| 16    | ATP5IF1    |
| 17    | VAPA       |
| 18    | IFI44L     |
| 19    | CAPS       |
| 20    | OAZ1       |
| 21    | TAGLN2     |
| 22    | EPCAM      |
| 23    | RPLP1      |
| 24    | SPINT2     |
| 25    | RRAD       |
| 26    | RPL10A     |
| 27    | CLU        |
| 28    | RPL3       |
| 29    | TUBB2A     |
| 30    | RPL30      |
| 31    | STOML3     |
| 32    | CKB        |
| 33    | OAS3       |
| 34    | RPL13      |
| 35    | TUBB4B     |
| 36    | PTTG1IP    |
| 37    | RPS28      |
| 38    | C11orf88   |
| 39    | RPL4       |
| 40    | CRIP1      |
| 41    | ST6GALNAC2 |
| 42    | TRIM22     |
| 43    | RPS18      |
| 44    | CCDC33     |
| 45    | UBE2L6     |
| 46    | RPS8       |
| 47    | SLC44A4    |
| 48    | GPX4       |
| 49    | CD99       |
| 50    | RPS5       |
| 51    | STAT1      |
| 52    | LGALS3     |
| 53    | GNAS       |
| 54    | CD59       |
| 55    | RPL18      |
| 56    | DDX60      |
| 57    | RPL32      |

|     |          |
|-----|----------|
| 58  | ACTR1B   |
| 59  | EZR      |
| 60  | RPS3A    |
| 61  | RHOB     |
| 62  | KRT10    |
| 63  | CTSH     |
| 64  | RPL35    |
| 65  | C9orf116 |
| 66  | IGFBP5   |
| 67  | SLC256A  |
| 68  | CITED2   |
| 69  | TUFM     |
| 70  | RPL26    |
| 71  | TMEM59   |
| 72  | ARL3     |
| 73  | PTPRN2   |
| 74  | CHCHD2   |
| 75  | ALDH3A1  |
| 76  | CCN1     |
| 77  | RPS14    |
| 78  | TTC29    |
| 79  | FBXW9    |
| 80  | PARP9    |
| 81  | RPL13A   |
| 82  | COPS6    |
| 83  | CBR1     |
| 84  | EEF1G    |
| 85  | GBP4     |
| 86  | SLC25A25 |
| 87  | FAM166B  |
| 88  | NDUFA4   |
| 89  | WDR13    |
| 90  | RPS10    |
| 91  | SAMD9    |
| 92  | ERBB2    |
| 93  | EEF1D    |
| 94  | CD24     |
| 95  | RPL21    |
| 96  | RIPK4    |
| 97  | ANAPC11  |
| 98  | CIB1     |
| 99  | ARL4A    |
| 100 | APOL6    |
| 101 | PIGR     |
| 102 | RPL34    |
| 103 | TPT1     |
| 104 | ELMO3    |
| 105 | COPS9    |
| 106 | STEAP3   |
| 107 | ACO2     |
| 108 | IFI16    |
| 109 | FAU      |
| 110 | DGCR6    |
| 111 | COMMD6   |
| 112 | ABHD2    |
| 113 | TRAF4    |
| 114 | RPS9     |
| 115 | RBM3     |

|     |          |
|-----|----------|
| 116 | PKIG     |
| 117 | EDF1     |
| 118 | EPHX1    |
| 119 | HSPBP1   |
| 120 | DTX3L    |
| 121 | RPS13    |
| 122 | ELF3     |
| 123 | CES1     |
| 124 | RPL37    |
| 125 | C9orf135 |
| 126 | ITGB4    |
| 127 | FAM183A  |
| 128 | EIF2AK2  |
| 129 | CALM1    |
| 130 | NDUFV1   |
| 131 | JUN      |
| 132 | NDUFB10  |
| 133 | TMEM205  |
| 134 | RPL27A   |
| 135 | FDXR     |
| 136 | TPPP3    |
| 137 | EPSTI1   |
| 138 | RPS29    |
| 139 | CD9      |
| 140 | RPLP2    |
| 141 | AGR2     |
| 142 | FIS1     |
| 143 | FAM174A  |
| 144 | ITGB5    |
| 145 | GCHFR    |
| 146 | MAPK8IP1 |
| 147 | RPS27    |
| 148 | SLFN5    |
| 149 | RPN1     |
| 150 | LAMTOR4  |
| 151 | MB       |
| 152 | CIRBP    |
| 153 | RPL18A   |
| 154 | COQ4     |
| 155 | C20orf85 |
| 156 | RPS17    |
| 157 | H2AJ     |
| 158 | UQCR11   |
| 159 | IGFBP7   |
| 160 | FAM166A  |
| 161 | RPL36A   |
| 162 | TCTEX1D2 |
| 163 | KIAA2013 |
| 164 | C11orf97 |
| 165 | DAG1     |
| 166 | MYL6     |
| 167 | SMDT1    |
| 168 | ANKRD65  |
| 169 | GDF15    |
| 170 | LRP11    |
| 171 | ZNFX1    |
| 172 | CDC34    |
| 173 | ATP5F1E  |

|     |                |
|-----|----------------|
| 174 | HNRNPF         |
| 175 | GNA11          |
| 176 | RPS21          |
| 177 | ZNF703         |
| 178 | TRIM28         |
| 179 | SSR4           |
| 180 | NDUFB2         |
| 181 | KRT19          |
| 182 | UQCRQ          |
| 183 | PPP2R1A        |
| 184 | DVL1           |
| 185 | RPL17-C18orf32 |
| 186 | MS4A6A         |
| 187 | TMEM141        |
| 188 | NDUFB7         |
| 189 | COX6A1         |
| 190 | CELSR1         |
| 191 | ROMO1          |
| 192 | CCDC153        |
| 193 | S100A6         |
| 194 | ARF5           |
| 195 | CYB561         |
| 196 | CTSB           |
| 197 | RPL7           |
| 198 | MID1IP1        |
| 199 | CXXC5          |
| 200 | GSN            |
| 201 | RUVBL2         |
| 202 | GADD45A        |
| 203 | RPL8           |
| 204 | TMEM9          |
| 205 | RPL7A          |
| 206 | ST14           |
| 207 | TIMM13         |
| 208 | NACA           |
| 209 | DDR1           |
| 210 | COMT           |
| 211 | POLR2L         |
| 212 | DPY30          |
| 213 | CD82           |
| 214 | TRIM5          |
| 215 | LRRC23         |
| 216 | ATAD3A         |
| 217 | TMA7           |
| 218 | AL928654.3     |
| 219 | KLF4           |
| 220 | SLPI           |
| 221 | ARL6IP4        |
| 222 | H3-3A          |
| 223 | NOP53          |
| 224 | NDUFA2         |
| 225 | TACSTD2        |
| 226 | RBMS2          |
| 227 | RPS19          |
| 228 | ZDHHC1         |
| 229 | CFAP53         |
| 230 | SIX2           |
| 231 | SELENOH        |

|     |            |
|-----|------------|
| 232 | RPL19      |
| 233 | CDKN2AIP   |
| 234 | RPS6       |
| 235 | LRRC46     |
| 236 | OAS1       |
| 237 | HINT1      |
| 238 | HAGH       |
| 239 | PLPPR3     |
| 240 | JTB        |
| 241 | ERGIC3     |
| 242 | MRPS31     |
| 243 | GUK1       |
| 244 | ITPA       |
| 245 | PERP       |
| 246 | UBXN6      |
| 247 | RPS15A     |
| 248 | CCDC74B    |
| 249 | PFKP       |
| 250 | ALOX15     |
| 251 | GTPBP6     |
| 252 | RHBDD2     |
| 253 | RPL29      |
| 254 | STUB1      |
| 255 | PGRMC1     |
| 256 | AKT1       |
| 257 | PTPRF      |
| 258 | UQCRC1     |
| 259 | C22orf15   |
| 260 | C12orf57   |
| 261 | ATP6V0B    |
| 262 | DHCR24     |
| 263 | AC011295.1 |
| 264 | RPS2       |
| 265 | EIF3CL     |
| 266 | RGL2       |
| 267 | RPS3       |
| 268 | LRRC75A    |
| 269 | MVP        |
| 270 | SPAG7      |
| 271 | RPL24      |
| 272 | TADA3      |
| 273 | P4HB       |
| 274 | PPP1R7     |
| 275 | SLC2A1     |
| 276 | RPS15      |
| 277 | TBCB       |
| 278 | EEF1B2     |
| 279 | BLOC1S1    |
| 280 | PYCR2      |
| 281 | SUN1       |
| 282 | MBTPS1     |
| 283 | POLR2J     |
| 284 | ASL        |
| 285 | SMIM22     |
| 286 | PLK2       |
| 287 | TLE5       |
| 288 | ATP5ME     |
| 289 | CCDC78     |

|     |            |
|-----|------------|
| 290 | GPX3       |
| 291 | BSG        |
| 292 | AKR1A1     |
| 293 | RPS24      |
| 294 | CFAP73     |
| 295 | NDUFC1     |
| 296 | TUBGCP2    |
| 297 | EIF3K      |
| 298 | C5orf49    |
| 299 | IMPA2      |
| 300 | DEGS2      |
| 301 | RPL41      |
| 302 | NIBAN2     |
| 303 | LRRC43     |
| 304 | LARP6      |
| 305 | GADD45GIP1 |
| 306 | XRN1       |
| 307 | EFNA1      |
| 308 | MRPL14     |
| 309 | RPL10      |
| 310 | CD151      |
| 311 | PROSER1    |
| 312 | RSPH9      |
| 313 | DDT        |
| 314 | SSBP4      |
| 315 | CHCHD6     |
| 316 | SGSM3      |
| 317 | SNRPD2     |
| 318 | SELENOS    |
| 319 | RPL6       |
| 320 | POLR2I     |
| 321 | CLDN4      |
| 322 | GSTA2      |
| 323 | ERP29      |
| 324 | CCDC96     |
| 325 | RPL17      |
| 326 | SNRPB      |
| 327 | RBP1       |
| 328 | UBXN11     |
| 329 | ARPC1A     |
| 330 | DDOST      |
| 331 | PRKCSH     |
| 332 | RPS16      |
| 333 | SRI        |
| 334 | NME2       |
| 335 | IFT43      |
| 336 | VPS51      |
| 337 | SELENBP1   |
| 338 | PSMA7      |
| 339 | NDUFAB1    |
| 340 | CYB5A      |
| 341 | CLDN3      |
| 342 | UBXN1      |
| 343 | UBL5       |
| 344 | LMNA       |
| 345 | EIF4H      |
| 346 | NDUFA13    |
| 347 | ST6GALNAC6 |

|     |          |
|-----|----------|
| 348 | DNAI2    |
| 349 | LRWD1    |
| 350 | ANAPC16  |
| 351 | APBB1    |
| 352 | COX5B    |
| 353 | POR      |
| 354 | CAPN1    |
| 355 | ROGDI    |
| 356 | CTTN     |
| 357 | MIF      |
| 358 | KRT17    |
| 359 | TRAK1    |
| 360 | EPHA2    |
| 361 | LRRC10B  |
| 362 | C12orf75 |
| 363 | WDR1     |
| 364 | OGFOD2   |
| 365 | GSTA1    |
| 366 | MMP24OS  |
| 367 | CLDN7    |
| 368 | KRT5     |
| 369 | PRR29    |
| 370 | NGRN     |
| 371 | ALKBH7   |
| 372 | RSPH1    |
| 373 | GTF3C5   |
| 374 | YIF1B    |
| 375 | SNX17    |
| 376 | MORN5    |
| 377 | R3HCC1   |
| 378 | RPS20    |
| 379 | KRT15    |
| 380 | DNPH1    |
| 381 | PUF60    |
| 382 | EIF3C    |
| 383 | MPG      |
| 384 | GAS2L2   |
| 385 | S100A13  |
| 386 | MRPL23   |
| 387 | SYTL1    |
| 388 | CHCHD1   |
| 389 | SCRN2    |
| 390 | PHACTR4  |
| 391 | ECHS1    |
| 392 | NENF     |
| 393 | COX4I1   |
| 394 | MRPL28   |
| 395 | CSRP1    |
| 396 | TOMM7    |
| 397 | ZNF562   |
| 398 | ECRG4    |
| 399 | CFAP298  |
| 400 | GADD45B  |
| 401 | ENKD1    |
| 402 | NQO1     |
| 403 | FKBP8    |
| 404 | TMED1    |
| 405 | GET3     |

|     |             |
|-----|-------------|
| 406 | PEPD        |
| 407 | RPL23A      |
| 408 | SGTA        |
| 409 | LMAN2       |
| 410 | RPL35A      |
| 411 | CUL7        |
| 412 | MRPS34      |
| 413 | RPL27       |
| 414 | ROPN1L      |
| 415 | AAMP        |
| 416 | SPOUT1      |
| 417 | AKR7A2      |
| 418 | BAIAP2      |
| 419 | RPL39       |
| 420 | WDR54       |
| 421 | RPL36       |
| 422 | TSPAN15     |
| 423 | RPL12       |
| 424 | PSMG3       |
| 425 | INO80D      |
| 426 | VILL        |
| 427 | RPSA        |
| 428 | CDK9        |
| 429 | SURF2       |
| 430 | SEPTIN9     |
| 431 | IFT57       |
| 432 | AHCY        |
| 433 | DPCD        |
| 434 | RPS10-NUDT3 |
| 435 | GPAA1       |
| 436 | GON7        |
| 437 | SIVA1       |
| 438 | DYNLRB2     |
| 439 | SEC61B      |
| 440 | MICOS10     |
| 441 | ADIRF       |
| 442 | ELOB        |
| 443 | NDUFAF3     |
| 444 | PWWP2B      |
| 445 | SERTAD1     |
| 446 | TCEA2       |
| 447 | SOD1        |
| 448 | CSTB        |
| 449 | DHX30       |
| 450 | PCYT2       |
| 451 | RABGAP1L    |
| 452 | ILF3        |
| 453 | PPIA        |
| 454 | CCDC88C     |
| 455 | TAB3        |
| 456 | NDUFS6      |
| 457 | UPF1        |
| 458 | LONP1       |
| 459 | DUS1L       |
| 460 | RPS12       |
| 461 | FAM92B      |
| 462 | NUMA1       |
| 463 | REL         |



|     |            |
|-----|------------|
| 464 | KEAP1      |
| 465 | AURKAIP1   |
| 466 | TFF3       |
| 467 | HMGN3      |
| 468 | UBAC1      |
| 469 | DNAJB2     |
| 470 | RPS25      |
| 471 | TST        |
| 472 | FXD3       |
| 473 | CCDC74A    |
| 474 | MRPL55     |
| 475 | AQP5       |
| 476 | DNAJB1     |
| 477 | TRAF7      |
| 478 | PFDN5      |
| 479 | HSPA1B     |
| 480 | DYNLL1     |
| 481 | CTSD       |
| 482 | PRPF31     |
| 483 | C16orf71   |
| 484 | HMGN2      |
| 485 | NUDC       |
| 486 | PHPT1      |
| 487 | THAP7      |
| 488 | RNH1       |
| 489 | GPS1       |
| 490 | PRMT2      |
| 491 | TSTD1      |
| 492 | PRPF6      |
| 493 | AC011448.1 |
| 494 | SERF2      |
| 495 | KRT18      |
| 496 | PEBP1      |
| 497 | SOX2       |
| 498 | ALDH3B1    |
| 499 | BCR        |
| 500 | GPX1       |
