# Supplementary material for: Identification of Novel COVID-19 Biomarkers by Multiple Feature Selection Strategies
Source: Hindawi journal article supplement (doi:10.1155/2021/2203636), 2021-09-27
Supplement: f3 [file 2203636.f3.pdf]

## Supplementary Table S3 Screened top 66 feature genes by IFS method

| Order | Name       |
|-------|------------|
| 1     | OAS2       |
| 2     | RPLP0      |
| 3     | IGFBP2     |
| 4     | ZMYND10    |
| 5     | CLSTN1     |
| 6     | XAF1       |
| 7     | PRDX5      |
| 8     | RPL15      |
| 9     | KRT8       |
| 10    | HERC6      |
| 11    | C9orf24    |
| 12    | RPS7       |
| 13    | MAGED2     |
| 14    | CMPK2      |
| 15    | EEF2       |
| 16    | ATP5IF1    |
| 17    | VAPA       |
| 18    | IFI44L     |
| 19    | CAPS       |
| 20    | OAZ1       |
| 21    | TAGLN2     |
| 22    | EPCAM      |
| 23    | RPLP1      |
| 24    | SPINT2     |
| 25    | RRAD       |
| 26    | RPL10A     |
| 27    | CLU        |
| 28    | RPL3       |
| 29    | TUBB2A     |
| 30    | RPL30      |
| 31    | STOML3     |
| 32    | CKB        |
| 33    | OAS3       |
| 34    | RPL13      |
| 35    | TUBB4B     |
| 36    | PTTG1IP    |
| 37    | RPS28      |
| 38    | C11orf88   |
| 39    | RPL4       |
| 40    | CRIP1      |
| 41    | ST6GALNAC2 |
| 42    | TRIM22     |
| 43    | RPS18      |
| 44    | CCDC33     |
| 45    | UBE2L6     |
| 46    | RPS8       |
| 47    | SLC44A4    |
| 48    | GPX4       |
| 49    | CD99       |
| 50    | RPS5       |
| 51    | STAT1      |
| 52    | LGALS3     |
| 53    | GNAS       |
| 54    | CD59       |
| 55    | RPL18      |
| 56    | DDX60      |
| 57    | RPL32      |

|    |          |
|----|----------|
| 58 | ACTR1B   |
| 59 | EZR      |
| 60 | RPS3A    |
| 61 | RHOB     |
| 62 | KRT10    |
| 63 | CTSH     |
| 64 | RPL35    |
| 65 | C9orf116 |
| 66 | IGFBP5   |
